# Supplementary material
Source: publisher figshare collection journal article supplement (https://tandf.figshare.com/articles/dataset/_/20369166)
Supplement: Supplementary file 1 [file 1]

## Sheet: Sheet1
Event	Time	date	Actor_type	Actor_short	Country	Text	Eng_text	Reply	Eng_reply	Type	Evidence	Demand_type	Reduce	Commission_reply	Reply_type	Language	Consumer_protection	Environment	Social_policy	Institutional_affairs	Chemical_policy	Single_market	Transport	Law_rights
e34	Y2015	2015-04-10	EU citizen	Citizen	France	Selon un règlement européen, 1251/2008 le certificat TRACES est exigé même pour les échanges internes aux états membres, au départ de piscicultures indemnes de SHV et NHI. S'agissant de vente d'oeufs, le certificat certifie rien de plus que le N° d'exploitation agréée, les oeufs n'étant pas suceptibles de "présenter des signes de maladies". C'est juste une paperasse inutile de plus. Il vaudrait m…	"According to a European regulation, 1251/2008 the TRACES certificate is required even for internal trade in member states, from fish farms free from VHS and NHI. Regarding the sale of eggs, the certificate certifies nothing more than the Approved farm number, eggs are not susceptible to "" show signs of disease. "It is just unnecessary paperwork more. It would be better to require national veter…	Au nom de la Plateforme REFIT, je vous remercie d'avoir présenté une suggestion sur l'efficacité, l'efficience ou la réduction de la charge administrative occasionnée par la règlementation de l'Union européenne ou encore par sa mise en œuvre par les États membres. La Plateforme REFIT a examiné votre suggestion et a conclu qu'elle ne préparerait pas pour le moment d'avis sur les questions soulevée…	On behalf of the REFIT Platform, I would like to thank you for presenting a suggestion on efficiency, effectiveness or reduction of the administrative charge raised by the European Union's regulations or even by its implementation Member States. The REFIT Platform examined your suggestion and concluded that it did not prepare for the review of the issues raised. This is because the information an…	Evidence	1	Reduce	1	1	Competence	FR	0.0326437	0.161297	0.0171197	0.0291047	0.0795513	0.249976	0.402917	0.0273907
e35	Y2015	2015-04-13	Business association	Business	United Kingdom	I understand that there is to be an on-line consultation regarding REFIT and the Habitats and Birds Directives which is due to take place in April 2015 - so far I have been unable to find it. The on-line consultation for the banning of driftnets passed un-noticed by most organisations and the NFFO would regard a similar exercise for REFIT as unacceptable unless the on-line questionnaire is widely…	I understand that there is to be an on-line consultation regarding REFIT and the Habitats and Birds Directives which is due to take place in April 2015 - so far I have been unable to find it. The on-line consultation for the banning of driftnets passed un-noticed by most organisations and the NFFO would regard a similar exercise for REFIT as unacceptable unless the on-line questionnaire is widely…			Opinion	0	Neutral	0	0		EN	0.0113895	0.885397	0.0194702	0.0131782	0.021976	0.0166625	0.0154387	0.016488
e36	Y2015	2015-04-16	EU citizen	Citizen	United Kingdom	Re: The Habitats Directive and Birds Directive changes. I am extremely concerned about the changes that are being proposed to the two above directives. These are hugely important documents that recognise the importance not only of particular species, but of the habitats that they comprise and survive in. We have to maintain our integrity and that of the habitats on which we rely. As an early care…	Re: The Habitats Directive and Birds Directive changes. I am extremely concerned about the changes that are being proposed to the two above directives. These are hugely important documents that recognise the importance not only of particular species, but of the habitats that they comprise and survive in. We have to maintain our integrity and that of the habitats on which we rely. As an early care…			Opinion	0	Increase	0	0		EN	0.0101416	0.771607	0.00926659	0.0106948	0.0823293	0.010525	0.0639373	0.041498
e37	Y2015	2015-04-22	EU citizen	Citizen	United Kingdom	I believe the nature conservation directives were landmark achievements and should not be watered down at all.	I believe the nature conservation directives were landmark achievements and should not be watered down at all.			Opinion	0	Increase	0	0		EN	0.179	0.610896	0.0253562	0.0286278	0.0448917	0.0372489	0.0286488	0.04533
e39	Y2015	2015-05-09	EU citizen	Citizen	Ireland	Birds directive Habitat Directive Birds directive particularly has clearly failed in that certain Birds ( Corvids ) have been given equal status, but in nature have gained an un-equal advantage, and are dessimating their fellow mammals. The Wrong people from a Blinkered mindset have influenced the EU unduly	Birds directive Habitat Directive Birds directive particularly has clearly failed in that certain Birds ( Corvids ) have been given equal status, but in nature have gained an un-equal advantage, and are dessimating their fellow mammals. The Wrong people from a Blinkered mindset have influenced the EU unduly	We have taken note of your views on the Birds Directive and Habitats Directive submitted through our REFIT portal. You may be interested to know that under the Commission's Regulatory Fitness and Performance Programme (REFIT) the Commission is currently evaluating how the Birds and Habitats have performed to date. The Fitness Check is drawing on a wide body of evidence and information provided by…	We have taken note of your views on the Birds Directive and Habitats Directive submitted through our REFIT portal. You may be interested to know that under the Commission's Regulatory Fitness and Performance Programme (REFIT) the Commission is currently evaluating how the Birds and Habitats have performed to date. The Fitness Check is drawing on a wide body of evidence and information provided by…	Opinion	0	Increase	0	1	Procedural	EN	0.012561	0.78996	0.0836591	0.0200213	0.0216608	0.0291137	0.0158353	0.0271893
e40	Y2015	2015-05-10	EU citizen	Citizen	Germany	Natura 2000 Die Auswahl der Gebiete (FFH, SPA) erfolgte in Deutschland auf undemokratischer und für die Flächeneigentümer nicht rechtmäßiger Basis. So wurden Flächenmeldungen beispielsweise von Umweltverbänden oder Naturschutzverwaltungen abgegeben. Die Eigentümer wurden in KEINEM Fall dabei beteiligt oder angehört. Es bestand folglich nie die Möglichkeit, sich gehen eine Ausweisung eines Natura2…	"Natura 2000 The areas (FFH, SPA) were selected in Germany on an undemocratic basis that was not lawful for the landowners. For example, area reports were submitted by environmental associations or nature conservation administrations. In no case were the owners involved or consulted. As a result, it was never possible to defend the designation of a Natura2000 area under the rule of law. Due to th…	Thank you for submitting your views through our REFIT portal. Many of the issues you raise are the subject of an evaluation (Fitness Check) of the EU Nature legislation (Birds Directive and Habitats Directive) which the Commission is currently carrying out. This evaluation is part of the Commission's Regulatory Fitness and Performance Programme and is evaluating how the legislation has performed …	Thank you for submitting your views through our REFIT portal. Many of the issues you raise are the subject of an evaluation (Fitness Check) of the EU Nature legislation (Birds Directive and Habitats Directive) which the Commission is currently carrying out. This evaluation is part of the Commission's Regulatory Fitness and Performance Programme and is evaluating how the legislation has performed …	Evidence	1	Reduce	1	1	Procedural	DE	0.0477551	0.70525	0.0774055	0.0346524	0.0357264	0.0227455	0.0554973	0.0209673
e42	Y2015	2015-05-19	EU citizen	Citizen	Greece	Commissions of banks all round Europa are not the same. Commissions and charges of Germany banks are too high,so that greek exporters have to pay a lot when a germany bank is envolved, i.e when a germany bank confirms a letter opf credit. Suggestion: I think that Germany banks must see charges and commissions of different banks and charge not more than banks in Greece, in order not to prevent fre…	Commissions of banks all round Europa are not the same. Commissions and charges of Germany banks are too high,so that greek exporters have to pay a lot when a germany bank is envolved, i.e when a germany bank confirms a letter opf credit. Suggestion: I think that Germany banks must see charges and commissions of different banks and charge not more than banks in Greece, in order not to prevent fre…	Commercial rates of interest, commissions and other charges are based on many factors. One of the main factors for the rate of interest is the risk that an individual loan might pose to the bank. For instance, a company with a low risk profile will most likely receive an offer with a low rate, while the offer for a company with a higher risk profile will most likely include a higher rate. These m…	Commercial rates of interest, commissions and other charges are based on many factors. One of the main factors for the rate of interest is the risk that an individual loan might pose to the bank. For instance, a company with a low risk profile will most likely receive an offer with a low rate, while the offer for a company with a higher risk profile will most likely include a higher rate. These m…	Opinion	0	Harmonization	0	1	Policy substantive	EN	0.0523746	0.0310641	0.015259	0.0146674	0.0311623	0.811275	0.0149281	0.0292695
e45	Y2015	2015-05-20	Company/business org	Business	United Kingdom	The slow pace at which things happen at EC , makes it impossible for SMEs to work effectively with EC. Suggestion: The culture of the organisation is fundamentally wrong. It should be less arrogant and more collaborative.	The slow pace at which things happen at EC , makes it impossible for SMEs to work effectively with EC. Suggestion: The culture of the organisation is fundamentally wrong. It should be less arrogant and more collaborative.	Thank you for your contribution to our website. We take note of your observation regarding SME's in Europe. In order for us to follow up on your observation we would be grateful if you could provide us with examples of how SME's effectiveness is being impacted by EU legislation. Best regards,	Thank you for your contribution to our website. We take note of your observation regarding SME's in Europe. In order for us to follow up on your observation we would be grateful if you could provide us with examples of how SME's effectiveness is being impacted by EU legislation. Best regards,	Opinion	0	Neutral	0	1	Policy substantive	EN	0.0402362	0.180897	0.0577084	0.318591	0.0385636	0.0942419	0.0563899	0.213372
e46	Y2015	2015-05-20	EU citizen	Citizen	Germany	The Alicante road towards a community trade mark is smooth but the acquisition of a US trademark protection via WIPO is a complete waste of time and resources, bureaucratic and discriminatory on the US side, meaning they even object to items that stem from the forms and the process, you need an US registered special attorney to make your case at the USPTO, even if you are right and they abitraril…	The Alicante road towards a community trade mark is smooth but the acquisition of a US trademark protection via WIPO is a complete waste of time and resources, bureaucratic and discriminatory on the US side, meaning they even object to items that stem from the forms and the process, you need an US registered special attorney to make your case at the USPTO, even if you are right and they abitraril…			Opinion	0	Increase	0	0		EN	0.0149107	0.218534	0.626419	0.0167999	0.0116326	0.0276186	0.0564661	0.0276192
e47	Y2015	2015-05-21	EU citizen	Citizen	France	The EU institutions seems to mix democracy, transparency and Twitter. Too many twitts by too many EU representatives or institutions...for a poor final result in people opinions about the EU institutions Suggestion: Limit the twitts accounts and twitts per day for institutions and représentative Hour Estimation: 200 000 Euro Estimation: 2 000 000	The EU institutions seems to mix democracy, transparency and Twitter. Too many twitts by too many EU representatives or institutions...for a poor final result in people opinions about the EU institutions Suggestion: Limit the twitts accounts and twitts per day for institutions and représentative Hour Estimation: 200 000 Euro Estimation: 2 000 000			Opinion	0	Increase	0	0		EN	0.0156235	0.0270441	0.615011	0.0149221	0.00698103	0.0318249	0.123155	0.165438
e48	Y2015	2015-05-22	Company/business org	Business	United Kingdom	EMC directive imposes restriction on Immunity unlike any other region world-wide except South Korea as a mandated requirement. Immunity should not be a mandateable requirement but is a product quality issue. Emissions is and should be a mandated requirement to avoid interference to other users of the radio spectrum The continually changes in applicable harmonised standards (EMCD and LVD), contrar…	EMC directive imposes restriction on Immunity unlike any other region world-wide except South Korea as a mandated requirement. Immunity should not be a mandateable requirement but is a product quality issue. Emissions is and should be a mandated requirement to avoid interference to other users of the radio spectrum The continually changes in applicable harmonised standards (EMCD and LVD), contrar…	Harmonised standards in the EU are not mandatory; they give presumption of conformity with the essential requirements of the New Approach Directives Any alternative technical solution that is justified is also accepted. New harmonised standards or revised version of the existing harmonised standards are based on the state of the art. They follow for nearly 100% the international standards which a…	Harmonised standards in the EU are not mandatory; they give presumption of conformity with the essential requirements of the New Approach Directives Any alternative technical solution that is justified is also accepted. New harmonised standards or revised version of the existing harmonised standards are based on the state of the art. They follow for nearly 100% the international standards which a…	Evidence	1	Reduce	1	1	Policy substantive	EN	0.0192281	0.548514	0.0235858	0.014437	0.335845	0.00844898	0.032225	0.0177161
e49	Y2015	2015-05-22	EU citizen	Citizen	Netherlands	De veiligheid in Europa kan verhoogd worden wanneer moslims, die geen Europese nationaliteit bezitten en in Europa verblijven, een verklaring te laten tekenen dat ze de Universele Verklaring van de Rechten van de Mens (UVRM VN) onderschrijven en tevens afstand nemen van de Cairo-verklaring. Deze Cairo-verklaring is op 5 augustus 1990 door islamitische landen ondertekend en is gebaseerd op de shar…	"Security in Europe can be increased when Muslims, who do not have European nationality and reside in Europe, sign a declaration that they endorse the Universal Declaration of Human Rights (UDHR) and also distance themselves from the Cairo- statement. This Cairo Declaration was signed by Islamic countries on August 5, 1990 and is based on Sharia as the basis for human rights, which is contrary to…			Opinion	0	Increase	0	0		NL	0.0156933	0.0638139	0.0147765	0.0160777	0.00715208	0.839996	0.0147365	0.0277541
e50	Y2015	2015-05-22	EU citizen	Citizen	Netherlands	Ik denk dat het zinvol is dat bij migratie, zowel van binnen als van buiten EU, de migrant aan de volgende voorwaarde voldoet: De migrant bezit arbeidszekerheid voordat hij/zij migreert of in eigen levensonderhoud kan voorzien.	“I think it makes sense for the migrant to meet the following condition in the event of migration, both from within and outside the EU: The migrant has job security before he / she migrates or can provide for his / her own livelihood. "			Opinion	0	Increase	0	0		NL	0.036778	0.0269535	0.038255	0.0256576	0.0129156	0.62199	0.188595	0.0488549
e52	Y2015	2015-05-29	EU citizen	Citizen	United Kingdom	Dear Sir or Madam, I am writing regarding the European Commission’s current REFIT initiative to voice a strong concern that, again, the focus of these reforms seem to solely focus in their narrative on economic growth, forgetting people and the environment. I understand the unstated logic here that growth and jobs are ultimately good for European citizens, and would broadly agree with this. But t…	Dear Sir or Madam, I am writing regarding the European Commission’s current REFIT initiative to voice a strong concern that, again, the focus of these reforms seem to solely focus in their narrative on economic growth, forgetting people and the environment. I understand the unstated logic here that growth and jobs are ultimately good for European citizens, and would broadly agree with this. But t…			Opinion	0	Increase	0	0		EN	0.00867331	0.677874	0.0625627	0.00980434	0.0306785	0.0359878	0.0285846	0.145835
e53	Y2015	2015-05-31	EU citizen	Citizen	Netherlands	Ik denk dat het zinvol is dat de belastingen (BTW en vennootsschapsbelasting) in Europa worden geharmoniseerd. Verlaagd BTW-tarieg verlagen naar 0%. Standaard BTW-tarief verlagen naar 15%. Vennootsschapsbelasting verhogen naar 49%. Deze verhoging is in overeenstemming met art. 22 Universele Verklaring Rechten van de Mens, waarin sprake is van hulpbronnen. Iedere Staat heeft recht op inkomsten van…	" I think it makes sense for taxes (VAT and corporate tax) to be harmonized in Europe. Reduced VAT rate to 0%. Reduce the standard VAT rate to 15%. Increase corporate tax to 49%. This increase is in accordance with art. 22 Universal Declaration of Human Rights, which refers to resources. Every State has the right to income from resources. Economic activities are resources. "	Thank you very much for your submission to our website. Taxation is shared competence between the EU and Member States. The Commission can table legislative proposal in the area of direct taxation, if the "approximation of such laws, regulations or administrative provisions of the Member States […] directly affect the establishment or functioning of the internal market" (Article 115 of the Treaty…	Thank you very much for your submission to our website. Taxation is shared competence between the EU and Member States. The Commission can table legislative proposal in the area of direct taxation, if the "approximation of such laws, regulations or administrative provisions of the Member States […] directly affect the establishment or functioning of the internal market" (Article 115 of the Treaty…	Evidence	1	Harmonization	0	1	Competence	NL	0.758061	0.020874	0.0122292	0.017424	0.0102937	0.144119	0.0128233	0.0241748
e54	Y2015	2015-06-01	Public authority	Non-business org	Bulgaria	Acquainted with water resources, mitigation of climate change through sustainable management of irrigation systems and drainage. Planning and programming processes in the context of climate change to achieve a balance between available water resources and water needs, and manage the risk of flooding and drought. Опозване на водните ресурси, смекчаване на въздействието на климатичните промени чрез…	Acquainted with water resources, mitigation of climate change through sustainable management of irrigation systems and drainage. Planning and programming processes in the context of climate change to achieve a balance between available water resources and water needs, and manage the risk of flooding and drought.			Opinion	0	Neutral	0	0		BG	0.00903693	0.908701	0.0118934	0.0123936	0.0236675	0.0104697	0.0124758	0.0113622
e56	Y2015	2015-06-16	Public authority	Non-business org	Belgium	Please follow the recommendations of the Global Risk Report 2015 of the World Economic Forum since the loss in biodiversity and ecosystems is one of the most important risks fot the economy: ‘Increasingly, decision-makers are realizing that biodiversity loss is not a second-order issue but is intricately linked to economic development, food challenges and water security.’ Moreover, the protection…	Please follow the recommendations of the Global Risk Report 2015 of the World Economic Forum since the loss in biodiversity and ecosystems is one of the most important risks fot the economy: ‘Increasingly, decision-makers are realizing that biodiversity loss is not a second-order issue but is intricately linked to economic development, food challenges and water security.’ Moreover, the protection…			Evidence	1	Increase	0	0		EN	0.00604708	0.842023	0.0265083	0.0119108	0.0251683	0.0636211	0.0138239	0.0108977
e57	Y2015	2015-06-17	EU citizen	Citizen	Ireland	Regulations relating to the transport of greyhounds from ireland to the uk. Restrictions are in place in the republic are putting transporters at a disadvantage driving the trade north of the border. No regulation exists on the border as it's not deemed necessary. The regulation is causing duplication of paperwork and traceability of greyhounds already exists and is having a negative impact on th…	Regulations relating to the transport of greyhounds from ireland to the uk. Restrictions are in place in the republic are putting transporters at a disadvantage driving the trade north of the border. No regulation exists on the border as it's not deemed necessary. The regulation is causing duplication of paperwork and traceability of greyhounds already exists and is having a negative impact on th…	The issues raised in your submission concern the national implementation of EU measures. The dispatch of dogs, including greyhounds, from one Member State to another is governed by the animal health conditions laid down in Council Directive 92/65/EEC and subject to the veterinary checks applicable to such trade in accordance with Council Directive 90/425/EEC. They are therefore applicable between…	The issues raised in your submission concern the national implementation of EU measures. The dispatch of dogs, including greyhounds, from one Member State to another is governed by the animal health conditions laid down in Council Directive 92/65/EEC and subject to the veterinary checks applicable to such trade in accordance with Council Directive 90/425/EEC. They are therefore applicable between…	Evidence	1	Harmonization	0	1	Policy substantive	EN	0.0140956	0.733919	0.036798	0.0166959	0.0230527	0.135593	0.0198539	0.0199919
e58	Y2015	2015-06-21	Business association	Business	Belgium	Financial Services - cross border transactions, consumers protection, data protection, Suggestion: A drastic review of all existing regulations, better involvement of the staekolders in the implementation process. Hour Estimation: 900 Euro Estimation: 100000	Financial Services - cross border transactions, consumers protection, data protection, Suggestion: A drastic review of all existing regulations, better involvement of the staekolders in the implementation process. Hour Estimation: 900 Euro Estimation: 100000	Regular reviews and comprehensive evaluations are part of the Commission's work to ensure that legislation is fit for purpose, also in the area of financial services. For instance, reviews of the EU Derivatives Regulation and the Capital Requirements Regulation are currently underway. Besides actions on individual pieces of legislation, the Commission is also conducting wider fitness checks and r…	Regular reviews and comprehensive evaluations are part of the Commission's work to ensure that legislation is fit for purpose, also in the area of financial services. For instance, reviews of the EU Derivatives Regulation and the Capital Requirements Regulation are currently underway. Besides actions on individual pieces of legislation, the Commission is also conducting wider fitness checks and r…	Opinion	0	Harmonization	0	1	Procedural	EN	0.16441	0.405777	0.0891535	0.0444196	0.0358487	0.0313677	0.198432	0.0305912
e59	Y2015	2015-06-26	Business association	Business	Ireland	Hello, I would like to know where I could find out if TUV certification for gym equipment is recognised in Ireland. I cannot find the relevant legislation or information online. Many thanks in advance. Kind regards, Eimear O'Mullane	Hello, I would like to know where I could find out if TUV certification for gym equipment is recognised in Ireland. I cannot find the relevant legislation or information online. Many thanks in advance. Kind regards, Eimear O'Mullane			Opinion	0	Neutral	0	0		EN	0.0317043	0.227552	0.0557923	0.0340954	0.0406059	0.108418	0.369931	0.131902
e60	Y2015	2015-07-05	EU citizen	Citizen	Romania	1. I want more taxes for trees sold outside and in Romanian Borders! 2. Three trees planted after each tree cut! 3. No more trees chopped for Christmas in Romania - only plastic trees to be sold! 4. Stunt weapons for forest people that protect forests 5. etc. Suggestion: It's easy, just modify the legislation!	1. I want more taxes for trees sold outside and in Romanian Borders! 2. Three trees planted after each tree cut! 3. No more trees chopped for Christmas in Romania - only plastic trees to be sold! 4. Stunt weapons for forest people that protect forests 5. etc. Suggestion: It's easy, just modify the legislation!			Opinion	0	Increase	0	0		EN	0.0106372	0.080353	0.789245	0.0131064	0.00705631	0.0327233	0.0189242	0.0479547
e61	Y2015	2015-07-05	EU citizen	Citizen	Spain	Estimad@s Srs: Europa, es un ejemplo ante el mundo, incluyendo la comunicación lingüística.-Los documentos oficiales que produce, son emitidos en todas las lenguas de los países que la forman.- Pero aún queda un trabajo muy grande por hacer, con respecto a los segundos escalones, y siguientes, de la Institución, en los que muy frecuentemente, los documentos que producen solo son emitidos en la le…	"Dear Srs: Europe is an example to the world, including linguistic communication.- The official documents it produces are issued in all the languages ​​of the countries that comprise it.- But there is still a very big work to do, with respect to the second and subsequent steps of the Institution, in which very frequently, the documents they produce are only issued in the language of the country t…			Evidence	1	Increase	0	0		ES	0.00307823	0.00828006	0.00589002	0.00488885	0.0289101	0.805181	0.13513	0.00864276
e62	Y2015	2015-07-05	EU citizen	Citizen	Ireland	Downgrading of the Birds and Habitat Directives following REFIT examination. REFIT seems to be a good idea but I would hope it would strengthen EU law on biodiversity and protection of species rather than weaken the existing directectives.	Downgrading of the Birds and Habitat Directives following REFIT examination. REFIT seems to be a good idea but I would hope it would strengthen EU law on biodiversity and protection of species rather than weaken the existing directectives.			Opinion	0	Increase	0	0		EN	0.0170831	0.748371	0.073338	0.0157612	0.0217016	0.0320752	0.0241699	0.0675004
e63	Y2015	2015-07-05	EU citizen	Citizen	Italy	Greece and further bailouts Suggestion: I do not want my taxes put to bailing out the Greek economy again and again - nor do my friends and acquaintances	Greece and further bailouts Suggestion: I do not want my taxes put to bailing out the Greek economy again and again - nor do my friends and acquaintances			Opinion	0	Increase	0	0		EN	0.059487	0.200604	0.0473911	0.0262818	0.0266974	0.146949	0.0415347	0.451055
e65	Y2015	2015-07-09	EU citizen	Citizen	Slovenia	Crisis in Grece ---Kriza v Grčiji Grčija naj gre takoj na Drahmo. Lahko jim jo tiska EU v neomejenih količinah. Grece mast go emidiatly to Drahma. EU mast help Grece with tehnicaly suport - print ecc. Janez Mihelič Slovenia Suggestion: Emidiatly start with printing Drahma for Grece. If will EU waits it will bee a katastrofic for Grece and us. Hour Estimation: 0 Euro Estimation: 0	"Crisis and Grece --- The crisis in Greece Greece should go to Drahma immediately. It can be printed by the EU in unlimited quantities. Grece mast go emidiatly to Drahma. EU mast help Grece with tehnicaly suport - print ecc. Janez Mihelič Slovenia Suggestion: Emidiatly start with printing Drahma for Grece. If will EU waits it will bee a catastrophic for Grece and us. Hour Estimation: 0 Euro Estim…			Opinion	0	Increase	0	0		SI	0.0083417	0.0198037	0.888593	0.00893001	0.00325778	0.0215538	0.0142426	0.0352769
e66	Y2015	2015-07-12	EU citizen	Citizen	Switzerland	For me the EU suffers from it´s top down Approach and should start a bottom-up re-design. At the Moment I experience many times that member state laws do not confirm with EU-laws and even when the new law has been filed for approval it takes sometimes very Long to be processed. During that time nobody knows what will be applicable and that cretes insecurity. Suggestion: Laws of member states shou…	For me the EU suffers from it´s top down Approach and should start a bottom-up re-design. At the Moment I experience many times that member state laws do not confirm with EU-laws and even when the new law has been filed for approval it takes sometimes very Long to be processed. During that time nobody knows what will be applicable and that cretes insecurity. Suggestion: Laws of member states shou…	Thank you for your swift reply. Lighten the load is not responsible for infringement procedures but for suggestions on how to improve the efficiency and effectiveness of EU legislation. If your case concerns infringement you can nevertheless send it to us and we will pass it on to the responsible services. Kind regards,	Thank you for your swift reply. Lighten the load is not responsible for infringement procedures but for suggestions on how to improve the efficiency and effectiveness of EU legislation. If your case concerns infringement you can nevertheless send it to us and we will pass it on to the responsible services. Kind regards,	Evidence	1	Harmonization	0	1	Competence	EN	0.0187496	0.116136	0.0200962	0.116763	0.124826	0.264214	0.211201	0.128015
e67	Y2015	2015-07-16	EU citizen	Citizen	France	This new online tool is a very very good idea first of all to help improve the EU laws but also to improve EU image by giving the citizen (and others) the ability to participate directly. HOWEVER the only available language is English which will massively reduce the scope of citizen able to participate. 24 languages may not be possible / reallistic but at least to add French, German, Italian and …	This new online tool is a very very good idea first of all to help improve the EU laws but also to improve EU image by giving the citizen (and others) the ability to participate directly. HOWEVER the only available language is English which will massively reduce the scope of citizen able to participate. 24 languages may not be possible / reallistic but at least to add French, German, Italian and …	Thank you for your submission on our website 'Lighten the load – Have your say'. This website is dedicated to collect views on how to make EU laws more effective and efficient, to identify actions for simplification and reduction of regulatory burden. We are happy to inform you that the 'Lighten the load – Have your say' submission form is now available in all EU languages and we thank you for yo…	Thank you for your submission on our website 'Lighten the load – Have your say'. This website is dedicated to collect views on how to make EU laws more effective and efficient, to identify actions for simplification and reduction of regulatory burden. We are happy to inform you that the 'Lighten the load – Have your say' submission form is now available in all EU languages and we thank you for yo…	Opinion	0	Neutral	0	1	Procedural	EN	0.0121147	0.0254248	0.0774679	0.0217479	0.00925094	0.318971	0.481411	0.053611
e68	Y2015	2015-07-20	Other	Citizen	Chile	dear, good day as the "comision europea", recuperate investment, to confront the crisis of grecia , economic and monetary policy.If invested does not justify and investment.the probability that grecia strikes a balance in the trade balance; is considering the global crisis. which it is the proposal of Grecia to achieve its economic balance post financial aid from the European commission y the can…	dear, good day as the "comision europea", recuperate investment, to confront the crisis of grecia , economic and monetary policy.If invested does not justify and investment.the probability that grecia strikes a balance in the trade balance; is considering the global crisis. which it is the proposal of Grecia to achieve its economic balance post financial aid from the European commission y the can…			Opinion	0	Increase	0	0		EN	0.449808	0.191479	0.0836399	0.0604627	0.12645	0.0123925	0.0620447	0.0137231
e69	Y2015	2015-07-22	EU citizen	Citizen	Belgium	On the introduction for this pages i read ,'The Commission would like to hear your views on how to make EU laws more effective' May i suggest you adopt a zero tolerance politic on most of them. Right now i'm concerned with the Faroes Pilot whaling Act. I realize the Faroe Islands are not part of the EU, but Denmark is. Danish government is enforcing Faroes Pilot Whaling Act with its own Navy. Arr…	On the introduction for this pages i read ,'The Commission would like to hear your views on how to make EU laws more effective' May i suggest you adopt a zero tolerance politic on most of them. Right now i'm concerned with the Faroes Pilot whaling Act. I realize the Faroe Islands are not part of the EU, but Denmark is. Danish government is enforcing Faroes Pilot Whaling Act with its own Navy. Arr…	Thank you for your inquiry regarding the Danish Government assisting whaling operations in the Faroe Islands. The Commission is committed to the protection of all cetaceans (whales, dolphins and porpoises) and would like to recall that within the EU, the capture or killing of cetaceans is prohibited under Council Directive 92/43/EEC of 21 May 1992 on the conservation of natural habitats and of wi…	Thank you for your inquiry regarding the Danish Government assisting whaling operations in the Faroe Islands. The Commission is committed to the protection of all cetaceans (whales, dolphins and porpoises) and would like to recall that within the EU, the capture or killing of cetaceans is prohibited under Council Directive 92/43/EEC of 21 May 1992 on the conservation of natural habitats and of wi…	Evidence	1	Harmonization	0	1	Competence	EN	0.00882764	0.170757	0.012936	0.0108867	0.0184515	0.709095	0.0129702	0.056076
e70	Y2015	2015-07-23	EU citizen	Citizen	Sweden	Hejsan. Mitt namn är Richard, 38 år från Helsingborg och jag har funderingar kring många ämne, särskild när det gäller TRAFFIKEN, då jag kör mycket både i Sverige och övriga Europa. Nästan alla länder använder VIGNETTER på sina vägar, och det är dyrt, speciell när man samlar ihop alla transiterade länder. Det är lite orättviss. Till och med Tyskland vill införa “TOLL ROAD”. SVERIGE MÅSTE INFÖRA O…	"Hello. My name is Richard, 38 years old from Helsingborg and I have thoughts on many topics, especially when it comes to TRAFFIC, as I drive a lot both in Sweden and the rest of Europe. Almost all countries use VIGNETTS on their roads, and it is expensive, especially when gathering all transit countries. That's a little unfair. Even Germany wants to introduce "TOLL ROAD". SWEDEN MUST ALSO INTROD…	Tack för dina kommentarer och förslag till förbättringar. Beslut om de problem som du tar upp fattas i varje EU-land – inte centralt inom EU. Vi föreslår därför att du kontaktar de myndigheter i Sverige som ansvarar för att ändra de lagar som nu gäller (t.ex. rörande maxhastigheten på svenska vägar, nödtelefoner längs vägarna eller byggande av vägar som är anpassade till trafikmängden) eller som …	Thank you for your comments and suggestions for improvements. Decisions about the problems you address are made in every EU country - not centrally within the EU. We therefore suggest that you contact the authorities in Sweden who are responsible for changing the laws that now apply (eg concerning the maximum speed on Swedish roads, emergency telephones along the roads or construction of roads th…	Evidence	1	Harmonization	0	1	Competence	SE	0.00255355	0.00455444	0.00664114	0.00324157	0.00113046	0.953244	0.00673237	0.0219022
e71	Y2015	2015-07-23	Company/business org	Business	United Kingdom	Road maps for influence seem understated, if at all. Also, key actors are not always diplomats or diplomacy trained. Technocrats, particularly of a finance ilk appear to rule the roost. Even putting the Greek situation on one side, oil', energy and defence seem less co-ordinated around cohesive diplomatic goals, more a hotchpotch of competing internal goals. Policy appears reactive instead of pro…	Road maps for influence seem understated, if at all. Also, key actors are not always diplomats or diplomacy trained. Technocrats, particularly of a finance ilk appear to rule the roost. Even putting the Greek situation on one side, oil', energy and defence seem less co-ordinated around cohesive diplomatic goals, more a hotchpotch of competing internal goals. Policy appears reactive instead of pro…			Opinion	0	Increase	0	0		EN	0.0125132	0.431714	0.140715	0.019501	0.0114317	0.0557744	0.0241315	0.304219
e75	Y2015	2015-07-24	EU citizen	Citizen	United Kingdom	Some countries in the EU has their own traditions, which destroys not just the species (e.g. Denmark - dolphin massacre; Malta - hunting for migratory bird) in a given area but has a huge affect on other wildlife populations and generally on the environment. It might have been 'all right' in the past when we didn't face to environmental destruction on such a high density but I believe we need to …	Some countries in the EU has their own traditions, which destroys not just the species (e.g. Denmark - dolphin massacre; Malta - hunting for migratory bird) in a given area but has a huge affect on other wildlife populations and generally on the environment. It might have been 'all right' in the past when we didn't face to environmental destruction on such a high density but I believe we need to …			Opinion	0	Increase	0	0		EN	0.0238642	0.57847	0.0240651	0.0131447	0.0141459	0.0889016	0.0158034	0.241606
e78	Y2015	2015-07-24	EU citizen	Citizen	United Kingdom	Continued protection for habitats and species across the EU	Continued protection for habitats and species across the EU			Opinion	0	Increase	0	0		EN	0.0228775	0.786908	0.024973	0.0243663	0.0469082	0.0306871	0.0280513	0.0352291
e79	Y2015	2015-07-24	EU citizen	Citizen	United Kingdom	the Habitats and Birds Directives have driven up nature conservation standards around Europe . For the sake of people and nature, please resist short sighted attempsts to undermine them	the Habitats and Birds Directives have driven up nature conservation standards around Europe . For the sake of people and nature, please resist short sighted attempsts to undermine them			Opinion	0	Increase	0	0		EN	0.134061	0.56485	0.0254019	0.0230185	0.030703	0.0351576	0.0497845	0.137023
e80	Y2015	2015-07-24	EU citizen	Citizen	United Kingdom	Concerned that the Habitats and Bird Directives will be watered down or devalued. These directives have saved a huge amount of biodiversity throughout the EU e.g bats, birds, butterflly popultations etc and habitats from woodlands to wetlands. UK has a wide range of examples. The spirit of the directives ( to protect, restore and create favourable conservation status of a wide range of species an…	Concerned that the Habitats and Bird Directives will be watered down or devalued. These directives have saved a huge amount of biodiversity throughout the EU e.g bats, birds, butterflly popultations etc and habitats from woodlands to wetlands. UK has a wide range of examples. The spirit of the directives ( to protect, restore and create favourable conservation status of a wide range of species an…			Opinion	0	Increase	0	0		EN	0.0771271	0.788883	0.0160153	0.0067471	0.0117664	0.0290974	0.0105092	0.0598541
e81	Y2015	2015-07-24	EU citizen	Citizen	United Kingdom	The nature directives are the main protection of protected areas and species. Their powers should be strengthened not weakened.	The nature directives are the main protection of protected areas and species. Their powers should be strengthened not weakened.			Opinion	0	Increase	0	0		EN	0.015836	0.791063	0.0815201	0.0177556	0.0270623	0.022853	0.0197326	0.0241769
e82	Y2015	2015-07-25	EU citizen	Citizen	United Kingdom	Review of the EU Habitats and Wildlife Directives - any weakening of the directives will pose a direct threat to habitats and species across the countries of the EU. Unfettered development is increasingly impacting upon both and we should be acutely aware that our environment is unique, precious and what we all depend upon for survival. Do not allow any reduction of the essential protection affor…	Review of the EU Habitats and Wildlife Directives - any weakening of the directives will pose a direct threat to habitats and species across the countries of the EU. Unfettered development is increasingly impacting upon both and we should be acutely aware that our environment is unique, precious and what we all depend upon for survival. Do not allow any reduction of the essential protection affor…			Opinion	0	Increase	0	0		EN	0.0140736	0.834622	0.0182186	0.00922369	0.0258035	0.0357337	0.0132037	0.0491213
e83	Y2015	2015-07-25	EU citizen	Citizen	United Kingdom	The possible weakening of the european directives protecting habitats and wildlife, please keep these strong. Suggestion: There are no suggestions as humans always put their needs first it is inevitable that wildlife will suffer more and more.	The possible weakening of the european directives protecting habitats and wildlife, please keep these strong. Suggestion: There are no suggestions as humans always put their needs first it is inevitable that wildlife will suffer more and more.	Further to your inquiry of 25 July, we would like to inform you that the Commission is undertaking a Fitness Check of the Birds and Habitats directives as part of a broader programme of taking stock of EU legislation to see whether it is fit for purpose. The objective of this exercise is not to call nature legislation into question, but to ensure that the legislative framework works well and achi…	Further to your inquiry of 25 July, we would like to inform you that the Commission is undertaking a Fitness Check of the Birds and Habitats directives as part of a broader programme of taking stock of EU legislation to see whether it is fit for purpose. The objective of this exercise is not to call nature legislation into question, but to ensure that the legislative framework works well and achi…	Opinion	0	Increase	0	1	Procedural	EN	0.0186142	0.589568	0.030056	0.0157657	0.0308108	0.0461425	0.0340693	0.234974
e84	Y2015	2015-07-25	EU citizen	Citizen	United Kingdom	I am concerned that environmental legislation, including the habitats directive, may be weakened, and that controls on the use of neonicotinamides in particular are inadequate. Without strong EU leadership, UK wildlife legislation could be dismantled under the present government, with disastrous consequences.	I am concerned that environmental legislation, including the habitats directive, may be weakened, and that controls on the use of neonicotinamides in particular are inadequate. Without strong EU leadership, UK wildlife legislation could be dismantled under the present government, with disastrous consequences.			Opinion	0	Increase	0	0		EN	0.0159116	0.78951	0.0205442	0.0200413	0.0808671	0.0208004	0.0313857	0.0209393
e85	Y2015	2015-07-25	EU citizen	Citizen	United Kingdom	The protection of wildlife habitat	The protection of wildlife habitat			Opinion	0	Increase	0	0		EN	0.0284174	0.736728	0.0317107	0.0311758	0.0563725	0.0383133	0.0354586	0.0418239
e86	Y2015	2015-07-25	EU citizen	Citizen	United Kingdom	I am concerned at the way planning laws in the UK have been relaxed which means that brownfield sites can be turned into housing estates without any regard for the true environmental and social value of the land being considered. Some of these brownfield sites are significant contributors to the variety of wildlife in our cities.	I am concerned at the way planning laws in the UK have been relaxed which means that brownfield sites can be turned into housing estates without any regard for the true environmental and social value of the land being considered. Some of these brownfield sites are significant contributors to the variety of wildlife in our cities.			Opinion	0	Increase	0	0		EN	0.0210312	0.427854	0.0251685	0.019293	0.0321971	0.0449722	0.0391418	0.390342
e88	Y2015	2015-07-25	EU citizen	Citizen	United Kingdom	The Habitats Regulations are not being properly applied in UK in planning decisions for major development. In particular, I feel UK Local Authorities and Government-led Agencies, particularly the Homes and Communities Agency, do not seem to fully understand what is required in an area containing an SAC and following the laid-down protocols. They are also not carrying out an Appropriate Assessment…	The Habitats Regulations are not being properly applied in UK in planning decisions for major development. In particular, I feel UK Local Authorities and Government-led Agencies, particularly the Homes and Communities Agency, do not seem to fully understand what is required in an area containing an SAC and following the laid-down protocols. They are also not carrying out an Appropriate Assessment…			Evidence	1	Increase	0	0		EN	0.00696024	0.330969	0.250771	0.0121666	0.19979	0.0147481	0.165651	0.0189436
e89	Y2015	2015-07-25	EU citizen	Citizen	United Kingdom	I am concerned that the EC may consider a merger between the EU Habitats and Birds Directives thus weakening the laws which, if properly implemented, would get nature's recovery back on track. The economy of the UK is working well with these laws and they are not a burden on businesses ( view Cemex statement at http://wtru.st/1BTUyj4). Please listen to the experts from conservation - not politici…	I am concerned that the EC may consider a merger between the EU Habitats and Birds Directives thus weakening the laws which, if properly implemented, would get nature's recovery back on track. The economy of the UK is working well with these laws and they are not a burden on businesses ( view Cemex statement at http://wtru.st/1BTUyj4). Please listen to the experts from conservation - not politici…			Evidence	1	Increase	0	0		EN	0.111856	0.356333	0.0181294	0.150306	0.084706	0.0382997	0.0232044	0.217165
e90	Y2015	2015-07-25	EU citizen	Citizen	United Kingdom	Wildlife conservation	Wildlife conservation			Opinion	0	Increase	0	0		EN	0.302689	0.350038	0.0397075	0.053362	0.0641803	0.0618547	0.0520413	0.0761274
e91	Y2015	2015-07-25	EU citizen	Citizen	United Kingdom	I am concerned that the EU is proposing to water down the directives that protect wildlife and their habitats, thus allowing more land to be made available for building and other forms of development.	I am concerned that the EU is proposing to water down the directives that protect wildlife and their habitats, thus allowing more land to be made available for building and other forms of development.			Opinion	0	Increase	0	0		EN	0.0253571	0.784387	0.0408118	0.0233838	0.0429839	0.0248	0.0271995	0.0310774
e92	Y2015	2015-07-25	EU citizen	Citizen	United Kingdom	That the legislation is going to change for the worse and threaten the rules and regulations protecting our precious environment- countryside, seascape and wildlife both flora and fauna.	That the legislation is going to change for the worse and threaten the rules and regulations protecting our precious environment- countryside, seascape and wildlife both flora and fauna.			Opinion	0	Increase	0	0		EN	0.0195958	0.744411	0.0227291	0.0845532	0.0580172	0.0217953	0.0223635	0.0265349
e93	Y2015	2015-07-25	EU citizen	Citizen	United Kingdom	The EU Nature Directives are one of the most important instruments we have for protecting our flora and fauna and the habitats they live in. It would be tragic if they were to be watered down to become ineffective against development. Without a natural environment and its contents providing the lungs of the planet, the human race cannot survive on concrete and money alone.	The EU Nature Directives are one of the most important instruments we have for protecting our flora and fauna and the habitats they live in. It would be tragic if they were to be watered down to become ineffective against development. Without a natural environment and its contents providing the lungs of the planet, the human race cannot survive on concrete and money alone.			Opinion	0	Increase	0	0		EN	0.0225397	0.630756	0.0385011	0.0187988	0.0377895	0.104277	0.0630194	0.0843185
e94	Y2015	2015-07-26	EU citizen	Citizen	United Kingdom	I am concerned at the proposals in the review of the HABITATS AND WILDLIFE DIRECTIVES to weaken the controls that protect wildlfe and habitats. We need to tighten the regulations still further to limit the relentless irreversible ongoing damage to our ecosystems.	I am concerned at the proposals in the review of the HABITATS AND WILDLIFE DIRECTIVES to weaken the controls that protect wildlfe and habitats. We need to tighten the regulations still further to limit the relentless irreversible ongoing damage to our ecosystems.			Opinion	0	Increase	0	0		EN	0.0295329	0.724287	0.023813	0.0265134	0.0867869	0.0278719	0.0550582	0.0261372
e95	Y2015	2015-07-26	EU citizen	Citizen	United Kingdom	I have been involved in wildlife conservation for over half a century and am alarmed by the rapid depletion of insect numbers and the consequent effects of this on bird species and on biodiversity in general. I believe these losses are due to the continued excessive use of insecticides and the relentless pressure of development on species rich habitats.	I have been involved in wildlife conservation for over half a century and am alarmed by the rapid depletion of insect numbers and the consequent effects of this on bird species and on biodiversity in general. I believe these losses are due to the continued excessive use of insecticides and the relentless pressure of development on species rich habitats.	Thank you for your submission to "Lighten the load - have your say". The Commission is currently undertaking a Fitness Check of the Birds and Habitats directives as part of a broader programme of taking stock of EU legislation to see whether it is fit for purpose. The objective of this exercise is not to call nature legislation into question, but to ensure that the legislative framework works wel…	Thank you for your submission to "Lighten the load - have your say". The Commission is currently undertaking a Fitness Check of the Birds and Habitats directives as part of a broader programme of taking stock of EU legislation to see whether it is fit for purpose. The objective of this exercise is not to call nature legislation into question, but to ensure that the legislative framework works wel…	Evidence	1	Increase	0	1	Procedural	EN	0.0954979	0.672301	0.0165464	0.0152962	0.0263908	0.0282959	0.116602	0.0290703
e97	Y2015	2015-07-27	EU citizen	Citizen	United Kingdom	Developmennt of buildings and new infrastructure on the environment, funding for coservation and a lack of help for farmers to improve their farming methods so they become sustainable to the environment.	Developmennt of buildings and new infrastructure on the environment, funding for coservation and a lack of help for farmers to improve their farming methods so they become sustainable to the environment.	Thank you for your submission to "Lighten the load - have your say". The need to ensure that diverging economic activities align with sustainable development is supported by the European Commission. The European Commission is currently undertaking a Fitness Check of the Birds and Habitats directives as part of a broader programme of taking stock of EU legislation to see whether it is fit for purp…	Thank you for your submission to "Lighten the load - have your say". The need to ensure that diverging economic activities align with sustainable development is supported by the European Commission. The European Commission is currently undertaking a Fitness Check of the Birds and Habitats directives as part of a broader programme of taking stock of EU legislation to see whether it is fit for purp…	Opinion	0	Increase	0	1	Policy substantive	EN	0.0219536	0.703884	0.0386604	0.0244556	0.0344717	0.0326869	0.0421652	0.101723
e98	Y2015	2015-07-27	EU citizen	Citizen	United Kingdom	A health natural environment is vital for health people, a healthy environment and healthy societies yet our natural environment is under attack from pressures for housing, transport, increased consumption and the need for resources combined with undervaluing ecosystems and the benefits they bring. The threat of weakening the Nature Directives due to the demands from business undermine any progre…	A health natural environment is vital for health people, a healthy environment and healthy societies yet our natural environment is under attack from pressures for housing, transport, increased consumption and the need for resources combined with undervaluing ecosystems and the benefits they bring. The threat of weakening the Nature Directives due to the demands from business undermine any progre…			Opinion	0	Increase	0	0		EN	0.00721885	0.934003	0.00811573	0.00595463	0.0146584	0.00837161	0.00682365	0.0148544
e99	Y2015	2015-07-27	EU citizen	Citizen	United Kingdom	Habitats Regulations are not adequate for protecting wildlife species and are not properly enforced. The Habitats Regulations should provide greater protection for more species and their habitats and anomalies need to be removed. For example the great crested newt and its habitat is protected but the adder which is more threatened is not adequately protected. One example locally is the 'Northern …	Habitats Regulations are not adequate for protecting wildlife species and are not properly enforced. The Habitats Regulations should provide greater protection for more species and their habitats and anomalies need to be removed. For example the great crested newt and its habitat is protected but the adder which is more threatened is not adequately protected. One example locally is the 'Northern …	Further to your inquiry of 27 July, we would like to inform you that the Commission is undertaking a Fitness Check of the Birds and Habitats directives as part of a broader programme of taking stock of EU legislation to see whether it is fit for purpose. The objective of this exercise is not to call nature legislation into question, but to ensure that the legislative framework works well and achi…	Further to your inquiry of 27 July, we would like to inform you that the Commission is undertaking a Fitness Check of the Birds and Habitats directives as part of a broader programme of taking stock of EU legislation to see whether it is fit for purpose. The objective of this exercise is not to call nature legislation into question, but to ensure that the legislative framework works well and achi…	Evidence	1	Increase	0	1	Procedural	EN	0.0676139	0.767409	0.0162532	0.0142954	0.0358087	0.0619909	0.0213705	0.0152586
e100	Y2015	2015-07-27	EU citizen	Citizen	Romania	Can one impose more legislation to prevent the use of wooden packages and wooden pallets in the EU in order to start saving the environment?	Can one impose more legislation to prevent the use of wooden packages and wooden pallets in the EU in order to start saving the environment?			Opinion	0	Increase	0	0		EN	0.0352786	0.452687	0.0266914	0.0434616	0.176104	0.120272	0.043503	0.102002
e101	Y2015	2015-07-30	Company/business org	Business	France	Reinforced border check in case of histamine or heavy metal alert. The RASFF procedure to re-establish an exporter to be allowed to export to the EU is extremely complicated and costly. A company under the list of reinforced controls must send 9 shipments of at list 300KG of products each and wait for each of the 9 analysis to go through... Most of the time even if the analysis are negative (good…	Reinforced border check in case of histamine or heavy metal alert. The RASFF procedure to re-establish an exporter to be allowed to export to the EU is extremely complicated and costly. A company under the list of reinforced controls must send 9 shipments of at list 300KG of products each and wait for each of the 9 analysis to go through... Most of the time even if the analysis are negative (good…	Thank you for your submission in the Lighten the Load – Have your say. According to Article 24 of Directive 97/78/EC, a programme of re-enforced checks at EU borders is set in motion when a serious infringement of veterinary EU legislation is notified by the Member States. In the case below it can be histamine or heavy metal which are found at excessive levels in fisheries. Therefore a re-enforce…	Thank you for your submission in the Lighten the Load – Have your say. According to Article 24 of Directive 97/78/EC, a programme of re-enforced checks at EU borders is set in motion when a serious infringement of veterinary EU legislation is notified by the Member States. In the case below it can be histamine or heavy metal which are found at excessive levels in fisheries. Therefore a re-enforce…	Evidence	1	Harmonization	0	1	Policy substantive	EN	0.046383	0.185569	0.0115631	0.0173217	0.365658	0.0162976	0.215769	0.141438
e102	Y2015	2015-08-01	EU citizen	Citizen	Romania	Can we eliminate wooden packages from the EU in order to prevent cutting trees	Can we eliminate wooden packages from the EU in order to prevent cutting trees			Opinion	0	Increase	0	0		EN	0.051878	0.30241	0.232243	0.0929694	0.100293	0.108992	0.0504195	0.0607941
e103	Y2015	2015-08-03	EU citizen	Citizen	Netherlands	FOOD SECURITY; The EU has only one set of rules and regulations based upon avoiding food related diseases. Avoiding is only necessary for the real weak people either, after an illness or the elderly and infants, roughly between 2 -5% of our population. Yet we push the other 95% of our population to make food safe by avoiding contact. Avoiding exposure leads to less resistance and breads more weak…	FOOD SECURITY; The EU has only one set of rules and regulations based upon avoiding food related diseases. Avoiding is only necessary for the real weak people either, after an illness or the elderly and infants, roughly between 2 -5% of our population. Yet we push the other 95% of our population to make food safe by avoiding contact. Avoiding exposure leads to less resistance and breads more weak…	Thank you for your message to the website 'Lighten the load – Have your say'. This website is dedicated to collect views on how to make EU laws more effective and efficient, to identify actions for simplification and reduction of regulatory burden. The EU has put in place a comprehensive set of rules to ensure that everyone enjoys an equal right to safe food. A “two speed” food safety system woul…	Thank you for your message to the website 'Lighten the load – Have your say'. This website is dedicated to collect views on how to make EU laws more effective and efficient, to identify actions for simplification and reduction of regulatory burden. The EU has put in place a comprehensive set of rules to ensure that everyone enjoys an equal right to safe food. A “two speed” food safety system woul…	Opinion	0	Reduce	1	1	Procedural	EN	0.0173284	0.280799	0.0477968	0.0195353	0.143706	0.0483278	0.0411639	0.401343
e104	Y2015	2015-08-06	EU citizen	Citizen	Latvia	1. THE COMFORTABLE POST-WORLD WAR II BARGAIN 2. THE ABSENCE OF A UNIFYING MECHANISM 3. EUROPE’S DEMOGRAPHIC DECLINE 4. THE NATO-EU DEADLOCK	1. THE COMFORTABLE POST-WORLD WAR II BARGAIN 2. THE ABSENCE OF A UNIFYING MECHANISM 3. EUROPE’S DEMOGRAPHIC DECLINE 4. THE NATO-EU DEADLOCK			Opinion	0	Neutral	0	0		EN	0.115616	0.145272	0.0206675	0.0725811	0.343343	0.0852841	0.0495295	0.167707
e105	Y2015	2015-08-14	Company/business org	Business	United Kingdom	Ensuring that Free Movement of goods, people and services are what it should and to make EU a truly EU with less barriers and Red taps across the EU but at the same time protecting the integrity and fundamentals of EECA Pillars Suggestion: To have ECJ and ECHR in every member state of the Union	Ensuring that Free Movement of goods, people and services are what it should and to make EU a truly EU with less barriers and Red taps across the EU but at the same time protecting the integrity and fundamentals of EECA Pillars Suggestion: To have ECJ and ECHR in every member state of the Union			Opinion	0	Harmonization	0	0		EN	0.0261508	0.101572	0.0313514	0.0274579	0.0158508	0.624535	0.0468597	0.126223
e107	Y2015	2015-08-17	NGO	Non-business org	Italy	TRANSPARENCY obligations should include timing of the processes (when a certain initiative is planned) and public work plan. The update of websites should have a mandatory deadline. We are often told that everything is on the website but it is very difficult to find (FTS, Comitology Register...) and the DG DEVCO website and related information is often not updated. In fact many information is giv…	TRANSPARENCY obligations should include timing of the processes (when a certain initiative is planned) and public work plan. The update of websites should have a mandatory deadline. We are often told that everything is on the website but it is very difficult to find (FTS, Comitology Register...) and the DG DEVCO website and related information is often not updated. In fact many information is giv…	Many thanks for your feedback on the EuropeAid website. It is very useful! Our web team is continuously improving usability of the website and we have many further developments ahead. For example, in the next few weeks, the advanced search tool will be improved to help users find documents and other useful content more easily. 1. Programming documents can already be found in a specific search too…	Many thanks for your feedback on the EuropeAid website. It is very useful! Our web team is continuously improving usability of the website and we have many further developments ahead. For example, in the next few weeks, the advanced search tool will be improved to help users find documents and other useful content more easily. 1. Programming documents can already be found in a specific search too…	Opinion	0	Increase	0	1	Procedural	EN	0.0788022	0.0436371	0.0139395	0.0300272	0.233584	0.0280928	0.245808	0.326109
e108	Y2015	2015-08-20	EU citizen	Citizen	Portugal	Finally, I think the EU should look to the Nordic countries to learn and get inspired from the systems they have there, if this is not already the case. Something which would save a lot of time and money and get rid of unnecessary bureaucracy would be to provide every EU-citizen with their individual signum. This would then be instead of all the various numbers you have in countries like Portugal…	Finally, I think the EU should look to the Nordic countries to learn and get inspired from the systems they have there, if this is not already the case. Something which would save a lot of time and money and get rid of unnecessary bureaucracy would be to provide every EU-citizen with their individual signum. This would then be instead of all the various numbers you have in countries like Portugal…	On behalf of the REFIT Platform, we would like to inform you that on 7 June 2017 the REFIT Platform has adopted an opinion on your suggestions regarding "identity and travel documents" (REFIT Platform ref. XIII.3.a). The adopted Opinion has also been published on the REFIT Platform's website . The follow-up to this adopted opinion will be made in the context of the preparation of the CWP2018 and …	On behalf of the REFIT Platform, we would like to inform you that on 7 June 2017 the REFIT Platform has adopted an opinion on your suggestions regarding "identity and travel documents" (REFIT Platform ref. XIII.3.a). The adopted Opinion has also been published on the REFIT Platform's website . The follow-up to this adopted opinion will be made in the context of the preparation of the CWP2018 and …	Evidence	1	Reduce	1	1	Adoption	EN	0.0272009	0.0207755	0.0184617	0.0152764	0.0100344	0.151717	0.0981323	0.658402
e109	Y2015	2015-08-20	EU citizen	Citizen	France	Bonjour, Je demande la censure des réseaux sociaux comme Facebook, Twitter et autres. Les réseaux sociaux sont la principale cause du cyber-harcèlement et de la cyber-criminalité. Les réseaux sociaux servent aux personnes comme pédophiles, caïds d'écoles et autres de nuire à une personne plus faible ou une personne porteur d'un handicap. C'est pour cela que je demande une loi Européenne visant à …	"Hello, I demand the censorship of social networks like Facebook, Twitter and others. Social networks are the main cause of cyber harassment and cyber crime. Social networks are used by people such as pedophiles, school bosses and others to harm a weaker person or a person with a disability. This is why I am asking for a European law aimed at censoring social networks in the European Union zone. …	Monsieur, Merci pour votre message qui a été transmis à EUROPE DIRECT. EUROPE DIRECT est un service d'information de l'Union européenne (UE) qui apporte des réponses aux questions d'ordre général sur l'UE posées par des citoyens et des entreprises. Pour en savoir plus sur EUROPE DIRECT, rendez-vous à l'adresse: http://europa.eu/europedirect Nous souhaitons attirer votre attention sur la réponse q…	Sir, Thank you for your message which was sent to EUROPE DIRECT. EUROPE DIRECT is a European Union (EU) information service providing answers to general questions about the EU from citizens and businesses. To find out more about EUROPE DIRECT, go to: http://europa.eu/europedirect We would like to draw your attention to the response we sent you on 08/20/2015 with reference number 1087267. Please f…	Opinion	0	Increase	0	1	Procedural	FR	0.0147523	0.0209575	0.0443157	0.0149709	0.00606693	0.0362141	0.04284	0.819882
e110	Y2015	2015-08-26	EU citizen	Citizen	Germany	Petition zur sofortigen Änderung des Durchführungsbeschluß (EU) 2015/893 der Kommission vom 9. Juni 2015 In der EU wird zur Zeit die Richtlinie 2000/29 EG des Rates vom 8. Mai 2000 überarbeitet. Im Zusammenhang mit dieser Richtlinie hat die EU-Kommission den Durchführungsbeschluß (EU) 2015/893 vom 9. Juni 2015 erlassen. Er verschärft den alten Durchführungsbeschluß vom 1. März 2012. Danach muß di…	"Petition for the immediate amendment of the Commission Implementing Decision (EU) 2015/893 of 9 June 2015 In the EU, Council Directive 2000/29 EC of May 8, 2000 is currently being revised. In connection with this directive, the EU Commission issued the Implementing Decision (EU) 2015/893 of June 9, 2015. It tightened the old implementation decision of March 1, 2012. After that, the st. Authority…			Evidence	1	Reduce	1	0		DE	0.00484894	0.0113299	0.00428938	0.859097	0.0245601	0.0218421	0.0669932	0.00703954
e111	Y2015	2015-08-26	EU citizen	Citizen	Ireland	Pointless EU ban on simple bright incandescent light bulbs. Supposed energy savings are not there for many reasons, and even if they were, alternative described information/taxation/market policies are more relevant also for those with saving objectives. As researched, original decision in favour of more complex expensive alternatives heavily weighted on "producer" side in advisory groups: manufa…	Pointless EU ban on simple bright incandescent light bulbs. Supposed energy savings are not there for many reasons, and even if they were, alternative described information/taxation/market policies are more relevant also for those with saving objectives. As researched, original decision in favour of more complex expensive alternatives heavily weighted on "producer" side in advisory groups: manufa…			Evidence	1	Reduce	1	0		EN	0.00967894	0.930631	0.00845372	0.00673513	0.0227631	0.00670905	0.00702496	0.00800436
e112	Y2015	2015-08-28	EU citizen	Citizen	Belgium	How are we going to feed everybody with delicious, nuticious and cheap protein? Suggestion: Allow permits for http://aquabounty.com/ genetically modified salmon to be farmed in european aquaculture facilities. Hour Estimation: 0 Euro Estimation: 0	How are we going to feed everybody with delicious, nuticious and cheap protein? Suggestion: Allow permits for http://aquabounty.com/ genetically modified salmon to be farmed in european aquaculture facilities. Hour Estimation: 0 Euro Estimation: 0			Opinion	0	Increase	0	0		EN	0.0185853	0.394935	0.434311	0.0204664	0.0239321	0.0359155	0.0320926	0.0397628
e113	Y2015	2015-08-29	EU citizen	Citizen	Denmark	The TTIP negotiations Suggestion: Reject the Investor-state dispute settlement (ISDS) madness. Giving corporations the right to sue member states for potential loss of profits? Look at all the countries that have already been hit by such disputes for trying to protect their environment against large polluting mines, or trying to protect the public health with anti-smoking laws or banning chemical…	The TTIP negotiations Suggestion: Reject the Investor-state dispute settlement (ISDS) madness. Giving corporations the right to sue member states for potential loss of profits? Look at all the countries that have already been hit by such disputes for trying to protect their environment against large polluting mines, or trying to protect the public health with anti-smoking laws or banning chemical…			Evidence	1	Reduce	1	0		EN	0.0223328	0.416274	0.0151878	0.0505009	0.0154134	0.174713	0.0163826	0.289196
e114	Y2015	2015-08-29	EU citizen	Citizen	United Kingdom	Do Not water down wildlife legislation as it protects our natural environment.	Do Not water down wildlife legislation as it protects our natural environment.	Further to your inquiry of 29 August, we would like to inform you that the Commission is undertaking a Fitness Check of the Birds and Habitats directives as part of a broader programme of taking stock of EU legislation to see whether it is fit for purpose. The objective of this exercise is not to call nature legislation into question, but to ensure that the legislative framework works well and ac…	Further to your inquiry of 29 August, we would like to inform you that the Commission is undertaking a Fitness Check of the Birds and Habitats directives as part of a broader programme of taking stock of EU legislation to see whether it is fit for purpose. The objective of this exercise is not to call nature legislation into question, but to ensure that the legislative framework works well and ac…	Opinion	0	Increase	0	1	Procedural	EN	0.0182766	0.829136	0.0207407	0.0202337	0.0421219	0.022631	0.0217767	0.0250837
e115	Y2015	2015-08-31	EU citizen	Citizen	Spain	Soy Ezequiel Briz Villanueva, doctor y profesor titular de la Facultad de Educación (Universidad de Zaragoza, España). Realicé una investigación consistente en una encuesta a 150 directores de recursos humanos de grandes empresas e instituciones de Aragón. La investigación, extrapolable a nivel nacional de España y significativa para la Comunidad Europea, indaga acerca de las habilidades de comun…	"I am Ezequiel Briz Villanueva, doctor and professor at the Faculty of Education (University of Zaragoza, Spain). I carried out an investigation consisting of a survey of 150 human resources directors of large companies and institutions in Aragon. The research, extrapolated to the level national of Spain and significant for the European Community, it inquires about oral communication skills relev…			Opinion	0	Neutral	0	0		ES	0.00877407	0.0512724	0.405358	0.0265536	0.0411183	0.0194353	0.432773	0.0147149
e117	Y2015	2015-09-03	EU citizen	Citizen	Netherlands	Een mogelijke oplossing voor het vluchtelingenprobleem kan zijn dat de vluchtelingen worden opgevangen in een land met dezelfde culturele achtergrond bijvoorbeeld Saoedie-Arabie. De oorzaak van het vluchtelingenprobleem is naar mijn mening dat op 5 augustus 1990 de islmitische landen de Cairo-verklaring hebben ondertekend, waarin staat dat de sharia uitgangspunt is voor de mensenrechten en men de…	“A possible solution to the refugee problem could be that the refugees are received in a country with the same cultural background, for example Saudi Arabia. The cause of the refugee problem, in my opinion, is that on August 5, 1990, the Islamic countries signed the Cairo Declaration, which states that Sharia is the starting point for human rights and that freedom of religion is not recognized. W…			Opinion	0	Increase	0	0		NL	0.0255431	0.00983209	0.00954276	0.00806378	0.00335907	0.907714	0.0174216	0.0185237
e118	Y2015	2015-09-04	EU citizen	Citizen	Spain	Hola, buenas tardes,para cuando se aprobará el programa operativo fse adaptabilidad y empleo para España? Gracias!	" Hello, good afternoon, when will the operational program fse adaptability and employment for Spain be approved? Thanks!"			Opinion	0	Neutral	0	0		ES	0.127627	0.111586	0.0408105	0.0603764	0.155866	0.0774397	0.343569	0.0827261
e119	Y2015	2015-09-04	EU citizen	Citizen	Netherlands	De vrede en veiligheid kan bewerkstelligd worden door EU, wanneer de islamitische landen de vrijheid van godsdienst opnieuw erkennen.	Peace and security can be achieved through the EU when the Islamic countries re-recognize freedom of religion.			Opinion	0	Neutral	0	0		NL	0.0122695	0.0302719	0.0192597	0.0163119	0.00837002	0.84701	0.0303804	0.0361268
e120	Y2015	2015-09-07	EU citizen	Citizen	France	Avec l'augmentation des flux migratoires n'est-il pas possible de proposer aux migrants volontaires une formation et les équiper pour en faire une armée internationale pour luter contre DAECH? Cela leur donnera l'espoir de retourner chez eux dans l'avenir et ainsi soulager l'europe. L'europe pourra utiliser une aide internationale efficace afin de rétablir l'équilibre international. Qu'en pensez-…	"With the increase in migratory flows, is it not possible to offer voluntary migrants training and equipping them to make an international army to fight against DAECH? This will give them hope to return home in the future and thus relieve europe Europe can use effective international aid to restore international equilibrium. What do you think? cordially Ali ALIOUATE "			Opinion	0	Increase	0	0		FR	0.185448	0.139831	0.0558857	0.0423014	0.020612	0.11318	0.166799	0.275944
e122	Y2015	2015-09-09	Other	Citizen	France	Les directives nous étrangles, les périmètres Natura 2000 sont faits pour nous interdire de travailler et donc de nous supprimer. En France les services de l'état exemple la DREAL ignore totalement les rapports scientifique, les droit de l'homme, le protocole PIDESC. Voivi le sujet qui nous préoccupe! Avons nous encore le droit de vivre ?	" The directives strangle us, the Natura 2000 perimeters are made to prohibit us from working and therefore to suppress us. In France, state services, for example, the DREAL totally ignores scientific reports, human rights and the ICESCR protocol. This is the subject that concerns us! Do we still have the right to live? "			Opinion	0	Reduce	1	0		FR	0.0266346	0.0860279	0.264152	0.0344154	0.0117432	0.278969	0.0592853	0.238772
e123	Y2015	2015-09-11	EU citizen	Citizen	Portugal	Boa noite sou portuguesa e emigrei para conseguir ter uma vida digna, porque o meu país nunca me ajudou, deixei ficar um apartamento em portugal que sozinha ( porque entretanto me divorciei) e durante 4 anos esforcei-me para cumprir as minhas obrigações bancárias, quando fui confrontada com um empréstimo que o meu ex marido fez sem o meu consentimento e não o cumpriu, o resultado foi a penhora do…	Suggestion: Don't take what is ours. Respect each other, respect others and take responsibility for what you do. EN TRANSLATION: Good evening I'm Portuguese and I emigrated to achieve a dignified life, because my country has never helped me, let him get an apartment in Portugal that alone (because though divorced) and for four years I struggled to meet my bank bonds when I was confronted with a l…			Opinion	0	Reduce	1	0		PT	0.0207409	0.0541694	0.0277265	0.00652996	0.0059668	0.0591932	0.0409212	0.784752
e124	Y2015	2015-09-14	EU citizen	Citizen	United Kingdom	Animation project funding is often listed under cultural policy; I wonder why it's not listed under business growth policy? Could there be a financial or economic remit to support independent animation companies in the UK as most are now being bought by North American or Asian investors. Without inward British investment, they lose the ability to compete internationally.	Animation project funding is often listed under cultural policy; I wonder why it's not listed under business growth policy? Could there be a financial or economic remit to support independent animation companies in the UK as most are now being bought by North American or Asian investors. Without inward British investment, they lose the ability to compete internationally.			Opinion	0	Increase	0	0		EN	0.0223755	0.0631654	0.0357506	0.208595	0.0242714	0.0576566	0.165575	0.422611
e125	Y2015	2015-09-16	EU citizen	Citizen	Romania	The medicinal products and the food supplements are not candy	The medicinal products and the food supplements are not candy			Opinion	0	Neutral	0	0		EN	0.0399206	0.26868	0.185204	0.0612735	0.265172	0.0568451	0.0596284	0.0632759
e126	Y2015	2015-09-19	Other	Citizen	India	Bovine Banks as Seed to attract Green Climate Fund and Impact Investment :- It's time we unlock the bovine science for the given commercial applications. 1st vertical as Nano Refinery Natural Gas consists of Methane (CH4) to the tune of 70-90%. Cow guts produce Methane upto 500 liters a day per cow, as per a research team of MIT , Cambridge and Woods Hole Oceanographic Institution, Univ. of Toron…	Bovine Banks as Seed to attract Green Climate Fund and Impact Investment :- It's time we unlock the bovine science for the given commercial applications. 1st vertical as Nano Refinery Natural Gas consists of Methane (CH4) to the tune of 70-90%. Cow guts produce Methane upto 500 liters a day per cow, as per a research team of MIT , Cambridge and Woods Hole Oceanographic Institution, Univ. of Toron…			Evidence	1	Increase	0	0		EN	0.145919	0.554443	0.152983	0.0327809	0.070782	0.0127186	0.0155214	0.0148517
e128	Y2015	2015-09-20	EU citizen	Citizen	France	Serait-il possible d'avoir les Consultations Publiques en Français pour moi par exemple. Ou plus généralement traduites dans toutes les langues des pays appartenants à l'Union Européenne. Tout le monde n'a pas la chance de maîtriser l'anglais. Merci	Would it be possible to have the Public Consultations in French for me for example. Or more generally translated into all the languages of the countries belonging to the European Union. Not everyone has the chance to master English. Thank you	Merci pour votre message concernant les consultations publiques. Malheureusement, nous ne sommes pas en mesure de fournir une version en langue française de toutes les consultations. Actuellement près d'un tiers des consultations en cours sont disponibles en français, notamment les consultations portant sur: - la citoyenneté de l’Union - les obstacles dans les régions frontalières - les besoins e…	Thank you for your message regarding the public consultations. Unfortunately, we are unable to provide a French language version of all consultations. Currently, almost a third of the consultations in progress are available in French, in particular the consultations concerning: - Union citizenship - obstacles in border regions - the needs in terms of speed and quality of the Internet beyond 2020 …	Opinion	0	Neutral	0	1	Procedural	FR	0.0117388	0.0374668	0.0256794	0.025236	0.00990099	0.790207	0.0607648	0.0390059
e129	Y2015	2015-09-22	Public authority	Non-business org	Spain	Dear Sir/Madame, I work in local public administration of Catalonia and I would be very pleased if you answered a doubt in order to apply the SCM. Concerning the basic SCM formula, SMC model defines price as follows "Price: Price consists of a tariff, wage costs plus overhead for administrative activities done internally or hourly cost for external service providers". Could you please clarify if …	Dear Sir/Madame, I work in local public administration of Catalonia and I would be very pleased if you answered a doubt in order to apply the SCM. Concerning the basic SCM formula, SMC model defines price as follows "Price: Price consists of a tariff, wage costs plus overhead for administrative activities done internally or hourly cost for external service providers". Could you please clarify if …	Thank you for your question. The hourly wage costs for the purpose of the standard cost model are calculated by summing up: hourly earnings, non-wage labour costs (such as social security contributions) and 25% overhead costs. Hourly wages used in EU baseline measurement are taken from the harmonized ISCO tariff covering all member states. National measurements may use different tariffs. Please f…	Thank you for your question. The hourly wage costs for the purpose of the standard cost model are calculated by summing up: hourly earnings, non-wage labour costs (such as social security contributions) and 25% overhead costs. Hourly wages used in EU baseline measurement are taken from the harmonized ISCO tariff covering all member states. National measurements may use different tariffs. Please f…	Evidence	1	Neutral	0	1	Policy substantive	EN	0.164191	0.0325236	0.00920123	0.0229866	0.1058	0.018725	0.469431	0.177142
e131	Y2015	2015-09-24	EU citizen	Citizen	Germany	When it comes to Family law, court decisions between the different countries have to be enforced without going to court again (free movement of Judgements according to EC2201/2003 - Brussels IIa). Mainly I am talking about Parental (Paternal) Child Contact. Means the foreign court order is valid in all EU member state countries. I have informed the EU Commission in March 2010 that UK is violating…	When it comes to Family law, court decisions between the different countries have to be enforced without going to court again (free movement of Judgements according to EC2201/2003 - Brussels IIa). Mainly I am talking about Parental (Paternal) Child Contact. Means the foreign court order is valid in all EU member state countries. I have informed the EU Commission in March 2010 that UK is violating…	Thank you for your message to the website 'Lighten the load – Have your say'. This website is dedicated to collect views on how to make EU laws more effective and efficient, to identify actions for simplification and reduction of regulatory burden. As your message did not contain this kind of suggestion but falls mainly under the competences of the Directorate General for Justice and consumers, w…	Thank you for your message to the website 'Lighten the load – Have your say'. This website is dedicated to collect views on how to make EU laws more effective and efficient, to identify actions for simplification and reduction of regulatory burden. As your message did not contain this kind of suggestion but falls mainly under the competences of the Directorate General for Justice and consumers, w…	Evidence	1	Reduce	1	1	Competence	EN	0.00674744	0.0103541	0.00876173	0.0152491	0.0367684	0.867374	0.0106963	0.0440489
e132	Y2015	2015-09-27	Company/business org	Business	Bulgaria	ICT 's and University Education and Trainingcts Suggestion: More confacts & questions to be useful. Hour Estimation: 100 Euro Estimation: 20 000	ICT 's and University Education and Trainingcts Suggestion: More confacts & questions to be useful. Hour Estimation: 100 Euro Estimation: 20 000			Opinion	0	Increase	0	0		EN	0.0116113	0.0411522	0.817498	0.0162088	0.00682157	0.0388119	0.0300906	0.0378058
e134	Y2015	2015-10-08	EU citizen	Citizen	Italy	Quería decir que la traducción al español no está bien hecha. Que la UE tampoco tiene que legislar continuamente como si tuviera convulsiones legales. Que el proceso legislativo es harto complejo y complicado. Debería simplificarse. Que porque haya más normas no significa que la Unión funcione mejor.	I wanted to say that the Spanish translation is not well done. That the EU also does not have to continuously legislate as if it has legal convulsions. That the legislative process is very complex and complicated. It should be simplified. That because there are more rules does not mean that the Union works better.	Gracias por su participación, Para poder dar curso a su contribución, necesitamos recibir sugerencias concretas sobre la manera de simplificar el proceso legislativo en un ámbito político determinado. Por lo que respecta a la traducción al español, lo comprobaremos con los servicios competentes. Atentamente,	Thanks for your participation, In order to take action on your contribution, we need to receive concrete suggestions on how to simplify the legislative process in a given policy area. Regarding the translation into Spanish, we will check it with the competent services. Sincerely,	Opinion	0	Reduce	1	1	Competence	ES	0.0304228	0.108007	0.0307776	0.0581378	0.0299986	0.0769844	0.451158	0.214513
e135	Y2015	2015-10-10	EU citizen	Citizen	Sweden	HUMAN OBLIGATIONS FROM EVEYBODY EVERYWHERE! We, workers and taxpayers, also have the human right to work to maintain only our own livelihood and enjoy our money from our work. We have been turn into slaves to work to support those who don't take their responsabilities to work and build their lives and their countries. Humanity is not only solidarity, it's not only rights, it's obligations also, o…	HUMAN OBLIGATIONS FROM EVEYBODY EVERYWHERE! We, workers and taxpayers, also have the human right to work to maintain only our own livelihood and enjoy our money from our work. We have been turn into slaves to work to support those who don't take their responsabilities to work and build their lives and their countries. Humanity is not only solidarity, it's not only rights, it's obligations also, o…			Opinion	0	Increase	0	0		EN	0.002817	0.00530869	0.00453188	0.00157964	0.00141427	0.00725904	0.00440738	0.972682
e136	Y2015	2015-10-10	EU citizen	Citizen	Slovakia	Tisztelt EB! Az egész probléma fiktív-kókler. Az EU az oktatást a tagállamokra bízta. Ezt a politika úgy gondolja lerendezni, hogy ne legyen zavar-nehézség. Az folyamatos oktatás van védve, de még az is, ha nemzeti jelleg mutatkozik. Ez a nagy elmélet. Az EU csak kivonul, az oktatás nincs jó karban. Az nem nagyon van rendben, hogy a trehány tanár "sikeres", terjesztheti a kóklerséget is. Ez van. …	"Dear EC! The whole problem is a fictitious broker. The EU has left education to the Member States. This policy is thought to be arranged so that there is no difficulty of confusion. Continuing education is protected, but even if it is national in nature. This is the big theory. The EU is just withdrawing, education is not well maintained. It 's not very good that the three teachers are "" succes…			Opinion	0	Increase	0	0		HU	0.0440386	0.0829832	0.216002	0.126302	0.0453314	0.146287	0.202008	0.137047
e137	Y2015	2015-10-13	EU citizen	Citizen	Italy	Normalizzare le leggi con applicazione immediate ai singoli stati. Retribuzione dei politici uguale a tutti gli stati europei e diritto alla pensione a 70 anni con sistema contributivo. Aggangiare la retribuzione alla presenza nel parlamento Sospendere la retribuzione al parlamentare che cambia partito o coalizione. Suggestion: Normalize laws with immediate application to the individual states . …	"Normalize the laws with immediate application to individual states. Remuneration of politicians equal to all European states and the right to a 70-year pension with a contributory system. Hooking pay to presence in parliament Suspend the salary of the parliamentarian who changes party or coalition. Suggestion: Normalize laws with immediate application to the individual states. Remuneration of po…			Opinion	0	Increase	0	0		IT	0.0295175	0.0874355	0.0744985	0.0412395	0.0104506	0.317841	0.0380854	0.400932
e138	Y2015	2015-10-14	EU citizen	Citizen	Austria	Liebe EU, ´mein Wutbürgeranliegen: Es gibt viele Berechnungen was der sinnlose EU Umzug an Kosten verursacht. Wann wird endlich das Verschleudern meines Steuergeldes beendet? Ein Kollege hat mal gesagt: ES reicht!!! Was war die Konsequenz daraus --> er sitzt nun auch auf einem hochdotierten EU Sessel Ich möchte mir erlauben mich anzuschließen : ES reicht http://www.deutsche-mittelstands-nachricht…	Dear EU, 'my angry citizen concerns: There are many calculations of the cost of the pointless EU move. When will the wasting of my tax money finally end? A colleague once said: IT’s enough !!! What was the consequence of this -> he is now also sitting on a highly endowed EU armchair I would like to allow myself to join: IT is enough http://www.deutsche-mittelstands-nachrichten.de/2012/10/47103/ I…			Opinion	0	Reduce	1	0		DE	0.261654	0.0356341	0.0387715	0.017794	0.0212286	0.141852	0.0397294	0.443337
e139	Y2015	2015-10-19	EU citizen	Citizen	Sweden	To demand people to commit with basic human obligations as work-responsability-respect in order to have aid would help themselves to learn and improve. They have had aid with no demands and this is not helping to end the problems, it is increasing year after year. Sometimes in life, the treatment that cures is very painful and then make people appreciate life better and learn to be more positive …	To demand people to commit with basic human obligations as work-responsability-respect in order to have aid would help themselves to learn and improve. They have had aid with no demands and this is not helping to end the problems, it is increasing year after year. Sometimes in life, the treatment that cures is very painful and then make people appreciate life better and learn to be more positive …			Opinion	0	Increase	0	0		EN	0.00699737	0.00706836	0.00619138	0.00388882	0.0025312	0.0121931	0.0118801	0.94925
e140	Y2015	2015-10-22	EU citizen	Citizen	Germany	Please get rid of all laws. People will find their own ways to fix these kinds of problems which are generally only made worse by state regulations. Please also remove tax while you're at it so we can have some extra funds for this purpose.	Please get rid of all laws. People will find their own ways to fix these kinds of problems which are generally only made worse by state regulations. Please also remove tax while you're at it so we can have some extra funds for this purpose.			Opinion	0	Reduce	1	0		EN	0.114098	0.034618	0.0294812	0.291689	0.0225179	0.216455	0.06087	0.230271
e142	Y2015	2015-10-30	EU citizen	Citizen	Spain	Deberian obligar a los estados a rehabilitar energeticamente todos los bloques de viviendas construidos antes de 1996, subvencionando el 90% del importe de la realizacion de envolventes termicas y de cambio de carpinteria, ya que sino los ciudadanos no lo realizaran. Esto creará empleo y reducira la factura energetica en un gran porcentaje. En 3-4 años esa inversion estará amortizada.	They should oblige the states to energetically rehabilitate all the housing blocks built before 1996, subsidizing 90% of the amount of the realization of thermal enclosures and carpentry change, since otherwise the citizens will not do it. This will create jobs and reduce your energy bill by a large percentage. In 3-4 years that investment will be amortized.	Nos ha señalado legítimamente la posibilidad de incrementar la eficiencia energética de los edificios, ya que su consumo energético representa actualmente cerca de un 40 % de la energía final total utilizada en la UE. El aumento de su eficiencia energética conduciría indudablemente a reducir de forma significativa las facturas energéticas de los ciudadanos y contribuiría asimismo al crecimiento d…	He has legitimately pointed out to us the possibility of increasing the energy efficiency of buildings, since their energy consumption currently represents around 40% of the total final energy used in the EU. Increasing their energy efficiency would undoubtedly lead to a significant reduction energy bills for citizens and would also contribute to the growth of employment in the Union. This is why…	Evidence	1	Increase	0	1	Adoption	ES	0.180905	0.116334	0.0431882	0.0292225	0.0219656	0.315391	0.110489	0.182505
e143	Y2015	2015-10-30	Company/business org	Business	United Kingdom	The Traditional Herbal Medicinal product directive is not fit for purpose. I am a regulatory compliance consultant and to date I have told 100s companies they cannot market their botanical/herbal products in the EU, because they are not foods,but do not fit into the extremely narrow defintion of tradtional use: 30 years on the market 15 of years of which in EU. Firstly tradtional use is a term us…	The Traditional Herbal Medicinal product directive is not fit for purpose. I am a regulatory compliance consultant and to date I have told 100s companies they cannot market their botanical/herbal products in the EU, because they are not foods,but do not fit into the extremely narrow defintion of tradtional use: 30 years on the market 15 of years of which in EU. Firstly tradtional use is a term us…			Evidence	1	Harmonization	0	0		EN	0.00981772	0.567102	0.0684848	0.0111708	0.162198	0.0119438	0.0139142	0.155369
e145	Y2015	2015-11-02	Company/business org	Business	Turkey	Online courses and soft materals developed for improving skills under life long learning activities are not usefull for people not speaking english. Suggestion: Flexibility on authorship and openess to cooperation , sharing knowledge. In our part we are missing knowkedge . Hour Estimation: 800 Euro Estimation: 100	Online courses and soft materals developed for improving skills under life long learning activities are not usefull for people not speaking english. Suggestion: Flexibility on authorship and openess to cooperation , sharing knowledge. In our part we are missing knowkedge . Hour Estimation: 800 Euro Estimation: 100			Opinion	0	Increase	0	0		EN	0.021557	0.0925181	0.503191	0.0352459	0.0269355	0.0469998	0.061508	0.212045
e147	Y2015	2015-11-04	Other	Citizen	Czechia	Dobrý den, domnívám se, že k velké úlevě soudů by došlo, kdyby byla více respektována doporučení Rady Ministrů a Komise. Ve východoevropských zemích byli nahrazeni státní soudní vykonavatelé za soukromníky- tzv.soudní exekutory, usilující o maximalizaci podnikatelského zisku. Jediné doporučení Rady, které systém akceptoval je konkurenční boj, má neblahé následky. Dochází k uplácení velkých věřite…	Hello, I believe that the courts would be greatly relieved if the recommendations of the Council of Ministers and the Commission were more respected. In Eastern European countries, bailiffs have been replaced by private bailiffs seeking to maximize business profits. The only Council recommendation that the system has accepted is competition, and it has unfortunate consequences. Large creditors ar…			Evidence	1	Harmonization	0	0		CZ	0.0173223	0.0110954	0.0157585	0.189839	0.00776366	0.516603	0.221758	0.0198603
e148	Y2015	2015-11-04	Company/business org	Business	Spain	El reconocimiento de los derechos de autor en el mundo editorial , en especial las obras y los artículos de los periodistas Suggestion: Unificar la normativa para su reconocimiento a nivel internacional	The recognition of copyright in the publishing world, especially the works and articles of journalists Suggestion: Unify the regulations for international recognition	Gracias por su contribución. Deseo informarla de que los derechos de los periodistas como autores de sus artículos ya están armonizados a escala de la UE en virtud de la normativa sobre derechos de autor de la UE, en particular, la Directiva 2001/29/CE, y, a escala internacional, por el Convenio de Berna y los Tratados de la Organización Mundial de la Propiedad Intelectual (OMPI). Encontrará más …	Thank you for your contribution. I wish to inform you that the rights of journalists as authors of their articles are already harmonized at EU level under EU copyright law, in particular Directive 2001/29 / EC, and, internationally, by the Berne Convention and the Treaties of the World Intellectual Property Organization (WIPO). More information on these instruments and on European policy in the f…	Opinion	0	Harmonization	0	1	Competence	ES	0.0269572	0.154962	0.0164167	0.521304	0.179229	0.0301688	0.0319247	0.0390379
e149	Y2015	2015-11-04	EU citizen	Citizen	Germany	Is it correct, that the Regulatory Scrunity Board should be equipped with something as powerful as a of veto right against the EU Comission for every regulation? "The [Regulatory Scrunity] Board examines and issues opinions on all the Commission's draft impact assessments and of major evaluations and "fitness checks" of existing legislation. In principle, a positive opinion is needed from the Boa…	Is it correct, that the Regulatory Scrunity Board should be equipped with something as powerful as a of veto right against the EU Comission for every regulation? "The [Regulatory Scrunity] Board examines and issues opinions on all the Commission's draft impact assessments and of major evaluations and "fitness checks" of existing legislation. In principle, a positive opinion is needed from the Boa…	The Regulatory Scrutiny Board was set up on 1 July 2015 and provides a central, independent, quality control function for Commission impact assessments and evaluation work. The Board examines and issues opinions on all the Commission's draft impact assessments and of major evaluations and "fitness checks" of existing legislation. In principle, a positive opinion is needed from the Board for an in…	The Regulatory Scrutiny Board was set up on 1 July 2015 and provides a central, independent, quality control function for Commission impact assessments and evaluation work. The Board examines and issues opinions on all the Commission's draft impact assessments and of major evaluations and "fitness checks" of existing legislation. In principle, a positive opinion is needed from the Board for an in…	Evidence	1	Neutral	0	1	Procedural	EN	0.0137312	0.393038	0.0181748	0.0392718	0.264788	0.0337017	0.211052	0.0262423
e150	Y2015	2015-11-13	EU citizen	Citizen	Czechia	Dobrý den, systém exekucí v České republice odporuje cílům Evropského společenství a není výkonem spravedlnosti. Z haléřových dluhů vznikají desetitisícové zisky advokátů a exekutorů, aniž by měl dlužník šanci se o haléřovém dluhu dozvědět a uhradit včas, poněvadž nyní platí fikce doručení i na platební rozkazy, platí smlouvy uzavřené po telefonu a úroveň ochrany spotřebitele nedosahuje standardn…	Good day, the system of executions in the Czech Republic contradicts the objectives of the European Community and is not the administration of justice. Pennies' debts generate tens of thousands of profits for lawyers and executors, without the debtor having a chance to find out about the penny debt and pay it on time, as delivery fiction now applies to payment orders, telephone contracts and the …			Opinion	0	Increase	0	0		CZ	0.0477771	0.0441094	0.0366419	0.232285	0.00796049	0.468419	0.0716753	0.0911318
e151	Y2015	2015-11-14	EU citizen	Citizen	United Kingdom	Dear EU, Our citizens voted for a trading partnership in the 1970's not a “one country” state. This “freedom of movement” policy has gone too far (as have a lot of other EU Treaties and ideas) and whilst people should of course be free to work in other countries, it would be sensible to let those countries have control over their own rules & borders. The "EU" is not democratically represented by …	Dear EU, Our citizens voted for a trading partnership in the 1970's not a “one country” state. This “freedom of movement” policy has gone too far (as have a lot of other EU Treaties and ideas) and whilst people should of course be free to work in other countries, it would be sensible to let those countries have control over their own rules & borders. The "EU" is not democratically represented by …			Opinion	0	Increase	0	0		EN	0.00482704	0.0074816	0.00877941	0.00576992	0.00220461	0.687897	0.0233433	0.259697
e152	Y2015	2015-11-16	EU citizen	Citizen	Sweden	Jag vill påminna kommissionen om hur viktigt det är att vara restriktiv med antibiotika användningen och aldrig använda antibiotika i förebyggande syfte eller tillväxtfrämjande syfte. Det finns goda exempel på länder inom EU där användandet av antibiotika inom lantbruket ligger på ett minimum. Ta lärdom av de goda exemplen. Om vi inte är försiktiga med antibiotikan idag kommer vi inte kunna använ…	I would like to remind the Commission of the importance of being restrictive of antibiotic use and never using antibiotics for preventive or growth-promoting purposes. There are good examples of countries in the EU where the use of antibiotics in agriculture is kept to a minimum. If we are not careful with antibiotics today, we will not be able to use it tomorrow as the multi-resistant bacteria h…	Thank you for your submission in the lighten the load – have your say. Antimicrobials are essential in combatting infectious diseases and antimicrobial resistance (AMR) is a serious threat both for human and animal health. Since AMR can be transferred from animals to humans and vice-versa via direct and indirect contact, a "One Health" approach based on collaboration and joined-up thinking of bot…	Thank you for your submission in the lighten the load – have your say. Antimicrobials are essential in combatting infectious diseases and antimicrobial resistance (AMR) is a serious threat both for human and animal health. Since AMR can be transferred from animals to humans and vice-versa via direct and indirect contact, a "One Health" approach based on collaboration and joined-up thinking of bot…	Evidence	1	Increase	0	1	Policy substantive	SE	0.00858174	0.0426427	0.0149915	0.00930632	0.00776635	0.137175	0.594371	0.185165
e153	Y2015	2015-11-19	EU citizen	Citizen	Germany	Impementierung einer digitalen Feedback-Plattform, auf der WissenschaftlerInnen und weitere Fachmenschen zu den EU-Gesetzgebungsentwürfen ein Feedack geben können. Und damit zur Verbesserung der EU-Rechstssetzung beitragen.	Implementation of a digital feedback platform on which scientists and other specialists can give a feedack on the EU draft legislation. And thus contribute to improving EU legislation.			Opinion	0	Increase	0	0		DE	0.0221811	0.158482	0.0212126	0.0330749	0.0552969	0.0358533	0.593608	0.0802904
e154	Y2015	2015-11-22	EU citizen	Citizen	Spain	Buenos días: Exijo el fin de la discriminación lingüística en la Unión Europea cuya causa es la política multilingüista absurda por cara, poco eficiente, no neutral (porque todos prefieren por pragmatismo aprender idiomas más extendidos y no los de menos hablantes). Existe el idioma esperanto que posibilita que todos los idiomas sean tratados por igual, sin dar preferencia al inglés en la educaci…	Good Morning: I demand an end to linguistic discrimination in the European Union, the cause of which is the absurd multilingual policy on the face of it, inefficient, not neutral (because everyone pragmatically prefers to learn more widespread languages ​​and not those with fewer speakers). There is the Esperanto language that allows all languages ​​to be treated equally, without giving preferenc…			Evidence	1	Harmonization	0	0		ES	0.00394615	0.0109067	0.9278	0.00531517	0.00144129	0.0304217	0.00897512	0.011194
e155	Y2015	2015-11-24	EU citizen	Citizen	Portugal	I work in A casino, in Portugal, and I have no protecion concerning smoke. I have to work sitted in a table, with 4,5 0r even 7 people smoking one meter from me, blowing the smoke to my face. It's forbiden to smoke in interior places all over Portugal,but not in casinos. After 25 years working in this job, I, that never smoked in all my life, have severe lung problems, are adviced by my phisician…	I work in A casino, in Portugal, and I have no protecion concerning smoke. I have to work sitted in a table, with 4,5 0r even 7 people smoking one meter from me, blowing the smoke to my face. It's forbiden to smoke in interior places all over Portugal,but not in casinos. After 25 years working in this job, I, that never smoked in all my life, have severe lung problems, are adviced by my phisician…			Opinion	0	Increase	0	0		EN	0.0137856	0.0157493	0.0142581	0.301539	0.0115356	0.0233551	0.0267832	0.592995
e156	Y2015	2015-11-29	EU citizen	Citizen	Austria	If you take a look at Israel or USA, mass shootings can be stopped by armed citizen! You want to disarm them, why? Could it be that you want to help these terrorists scum? Or do you want to create new slaves? Or are you scared, that the EU won't earn enough money trough new "taxes"? So what could be the solution? Armed citizen are buying their equipment themselfes, the state saves money and earn …	If you take a look at Israel or USA, mass shootings can be stopped by armed citizen! You want to disarm them, why? Could it be that you want to help these terrorists scum? Or do you want to create new slaves? Or are you scared, that the EU won't earn enough money trough new "taxes"? So what could be the solution? Armed citizen are buying their equipment themselfes, the state saves money and earn …			Opinion	0	Reduce	1	0		EN	0.0804606	0.0241492	0.106219	0.0128695	0.00552261	0.222037	0.0386376	0.510105
e158	Y2015	2015-12-04	EU citizen	Citizen	Finland	The gun ban that EU is pushing ahead is illegal. Primarily Germany and France, but also other southern EU countries have messed up the whole idea of EU with their sloppy immigration politics and are now trying to make smaller and northern countries suffer because of their stupid & criminal decisions made under influence of blind humanism. Greece is corrupt and worthless: Just name ONE thing that …	The gun ban that EU is pushing ahead is illegal. Primarily Germany and France, but also other southern EU countries have messed up the whole idea of EU with their sloppy immigration politics and are now trying to make smaller and northern countries suffer because of their stupid & criminal decisions made under influence of blind humanism. Greece is corrupt and worthless: Just name ONE thing that …			Opinion	0	Reduce	1	0		EN	0.00444684	0.00504489	0.00788608	0.00382005	0.00153077	0.586653	0.00821725	0.382401
e159	Y2015	2015-12-07	EU citizen	Citizen	Sweden	Hunters are not terrorists. Swedish gun laws are more than sufficient. Many scientific studies prove that legal hunting guns are no problems in Sweden The deactivation of military guns is a problem Do not punish swedish hunters using semi automatic rifles Punish the criminals supplying tons of deactivated guns to other criminals	Hunters are not terrorists. Swedish gun laws are more than sufficient. Many scientific studies prove that legal hunting guns are no problems in Sweden The deactivation of military guns is a problem Do not punish swedish hunters using semi automatic rifles Punish the criminals supplying tons of deactivated guns to other criminals	Thank you for your message to the website 'Lighten the load – Have your say'. This website is dedicated to collect views on how to make EU laws more effective and efficient, to identify actions for simplification and reduction of regulatory burden. As your message did not contain this kind of suggestion it will not be treated further in this context. We invite you to consult the following website…	Thank you for your message to the website 'Lighten the load – Have your say'. This website is dedicated to collect views on how to make EU laws more effective and efficient, to identify actions for simplification and reduction of regulatory burden. As your message did not contain this kind of suggestion it will not be treated further in this context. We invite you to consult the following website…	Opinion	0	Reduce	1	1	Competence	EN	0.00900141	0.0279092	0.0452517	0.0189898	0.0110187	0.103561	0.750768	0.0335007
e160	Y2015	2015-12-10	EU citizen	Citizen	Spain	Io mi sono laureata all Universita di Bergamo e il tema della mia tesi era in diritto internazionale e piu specificamente della Comunita Europea. Mi fa male pensare di tutto quello che si sta discutendo riguardo la sospensione della zona Schengen. Non so la decisione che i leader Europei andranno a prendere domani venerdi l`11/12/15, ma esprimo fermamente la mia opinione che Schengen e` e deve ri…	I graduated from the University of Bergamo and the subject of my thesis was in international law and more specifically of the European Community. It hurts me to think of everything that is being discussed regarding the suspension of the Schengen zone. I do not know the decision that the European leaders will pick up tomorrow Friday 11/12/15, but I firmly express my opinion that Schengen is and mu…			Evidence	1	Increase	0	0		IT	0.00389662	0.00849518	0.0128076	0.00640236	0.0028978	0.0911007	0.318465	0.555935
e161	Y2015	2015-12-11	EU citizen	Citizen	Austria	Nowadays, the global climate summit is taking place in Paris. Many promises are made, we are waiting for the draft being finally transformed into a binding treaty. Well, I hope that each country will do its best do decrease the environment pollution. However, the new government in Poland has also promised not to close any of coal mines. Not only are they immensely unprofitable but also their acti…	Nowadays, the global climate summit is taking place in Paris. Many promises are made, we are waiting for the draft being finally transformed into a binding treaty. Well, I hope that each country will do its best do decrease the environment pollution. However, the new government in Poland has also promised not to close any of coal mines. Not only are they immensely unprofitable but also their acti…			Evidence	1	Increase	0	0		EN	0.00812346	0.575054	0.171109	0.0139598	0.0404695	0.14458	0.0142086	0.0324966
e162	Y2015	2015-12-11	EU citizen	Citizen	Austria	A couple of months ago I read in the newspaper about a Romanian village whose all inhabitants moved to Berlin at once. So simply - all at on time. Not to work. Without any knowledge of German. Only to receive welfare payment. And it was not a conservative, nationalistic, xenophobic newspaper. In my opinion, the members of the European Union should be able to send back such people to their own cou…	A couple of months ago I read in the newspaper about a Romanian village whose all inhabitants moved to Berlin at once. So simply - all at on time. Not to work. Without any knowledge of German. Only to receive welfare payment. And it was not a conservative, nationalistic, xenophobic newspaper. In my opinion, the members of the European Union should be able to send back such people to their own cou…			Opinion	0	Increase	0	0		EN	0.0472691	0.0113022	0.0437454	0.0083049	0.0029512	0.643604	0.0158511	0.226972
e164	Y2015	2015-12-16	EU citizen	Citizen	Slovakia	Vážení pánové, Je problém, že Brusel jde za svým nosem a na nic ohledy nebere. Hlavně to jsou školy, tedy chybně se učí a je následně problém na každém kroku. Uchazeč o práci v EU na přijímacím řízení uspěje, když členové komise vyškolili se ze stejných učebnic. Pro klid duše se školení též dodatečně udělá, ale je to jen deprese a krize. Podle práva školy patří členským států. Směrem na 28 + 4 = …	Sirs, the problem is that Brussels is not its nose and for nothing considerations. Schools are therefore, in essence, wrongly learn and intermediate issue at every step of the way. EU jobseekers succeed on recruitment procedures, when the members of the Commission, for the same train textbooks. The training also for calm dem 4 034.79 inner tubes, but it’s just her depression and crisis. Schools a…			Opinion	0	Increase	0	0		CZ	0.011872	0.0494254	0.180011	0.163589	0.0456608	0.32556	0.15366	0.0702218
e169	Y2015	2015-12-26	EU citizen	Citizen	United Kingdom	Online Form Suggestion: Need for more character spaces on your online form - as attachments are too large if pdf form, also if docx and rtf are unsupported document attachments so no way to know whether they got through - unless emailed behind scenes. Perhaps an email address link would be just as useful as an online form. Just saying - HRA freedom of expression includes capture of information. H…	Online Form Suggestion: Need for more character spaces on your online form - as attachments are too large if pdf form, also if docx and rtf are unsupported document attachments so no way to know whether they got through - unless emailed behind scenes. Perhaps an email address link would be just as useful as an online form. Just saying - HRA freedom of expression includes capture of information. H…			Opinion	0	Neutral	0	0		EN	0.00782829	0.0188079	0.807393	0.110623	0.005954	0.0180163	0.0141223	0.0172554
e170	Y2015	2015-12-29	EU citizen	Citizen	Belgium	Je voulais m'informer sur l'initiative REFIT, mais une petite page disponible dans toutes les langues mise à part, tout est en anglais (même la décision de la Commission). Vous pensez que c'est la meilleure façon pour intéresser le citoyen aux questions européennes?	I wanted to learn more about the REFIT initiative, but a small page available in all languages apart, everything is in English (even the Commission decision). Do you think this is the best way to get citizens interested in European issues?			Opinion	0	Neutral	0	0		FR	0.0197904	0.101864	0.0248466	0.0192209	0.0155139	0.278915	0.0333752	0.506474
e171	Y2016	2016-01-02	EU citizen	Citizen	Czechia	4.8.2015 podal místopředseda Poslanecké sněmovny Parlamentu ČR písemnou Stížnost na " Podezření na porušení práva unie ze strany členského státu" na formuláři EK. Další tutéž stížnost jsem podal osobně já dne 29.9.2015 doporučenou poštou. Dosud postrádáme oba takzvané potvrzení o přijetí podnětu s uvedením čísla jednacího písemnosti. Platí vnitřní předpisy EK o administraci a termínech odeslání o…	Vice-handed Chamber of Deputies written complaint about "" suspected breaches of EU law by a Member State "" to form the European Commission. Another complaint I filed the same person I am on Sept. 29, 2015, by registered post. So far, we lack both the so-called confirmation of receipt of the complaint under reference number of the document. EC apply internal rules of administration and terms of …			Opinion	0	Neutral	0	0		CZ	0.248915	0.0169903	0.00838053	0.648873	0.0175336	0.0201005	0.024469	0.0147377
e172	Y2016	2016-01-03	Company/business org	Business	France	REFIT is working on changes to be made on MiFID, PRIIPS...These régulations concern a very specialize industry in Europe. Parts of this industry englobes Banks, Insurance companies and Financial trading services companies but also Financial Planers, Brokers that represent more than four million emloyees in Europe. You created a commission to discuss about the futurs régulations and changes in the…	REFIT is working on changes to be made on MiFID, PRIIPS...These régulations concern a very specialize industry in Europe. Parts of this industry englobes Banks, Insurance companies and Financial trading services companies but also Financial Planers, Brokers that represent more than four million emloyees in Europe. You created a commission to discuss about the futurs régulations and changes in the…	Thank you for your message raising a question about the appointment of the members of the stakeholder group of the REFIT Platform. The selection of experts for the stakeholder group of the REFIT platform was based on the criteria laid out in the Commission decision establishing the Platform C(2015) 3261, namely that: - The Stakeholder group must (Article 4.3): "consist of experts from business, i…	Thank you for your message raising a question about the appointment of the members of the stakeholder group of the REFIT Platform. The selection of experts for the stakeholder group of the REFIT platform was based on the criteria laid out in the Commission decision establishing the Platform C(2015) 3261, namely that: - The Stakeholder group must (Article 4.3): "consist of experts from business, i…	Evidence	1	Neutral	0	1	Procedural	EN	0.0600535	0.512498	0.0781803	0.0381107	0.0114666	0.018975	0.0190393	0.261677
e173	Y2016	2016-01-04	EU citizen	Citizen	Slovenia	No entiendo como es posible que en un tanto por ciento muy elevado, se acceda a la web de la comisión europea o a la normativa común en idiomas como el inglés, francés e incluso alemán y no se incluya el español como, si no el primero, el segundo idioma más hablado del mundo. O al menos podrían incluirlo en las pestañas para elegir el idioma. En una Europa en común, todo el acceso a las normas co…	I do not understand how it is possible that a very high percentage are accessing the website of the European Commission or the common rules for languages like English, French and even German and Spanish is not included as, if not the first, the second most spoken language in the world. Or at least they could include the tabs to choose the language. In a Europe in common, all access to Community s…			Opinion	0	Neutral	0	0		ES	0.00663368	0.00991258	0.0112629	0.00855995	0.0034208	0.890622	0.0256303	0.0439576
e174	Y2016	2016-01-07	Other	Citizen	Austria	Das FWU (www.fwu.at) teilt mit, dass Maßnahmen im Rahmen von REFIT nicht dazu führen dürfen, dass: Problematische Regelungen in Freihandelsabkommen wie z.B. TTIP (Aushebeln der Justiz der Staaten durch Investitionsgerichte, Umgehung von Qualitätsstandards, …) „durch die Hintertür“ ermöglicht werden. Demokratiedefizite geschaffen werden. soziale, ökologische, gesundheitliche Aspekte weniger berück…	The Forum Wissenschaft & Umwelt [Science and Environment Forum] (http://fwu.at/praesidium-und-vorstand.html) would like to inform you that REFIT actions should not lead to a situation where: • it is possible for problematic legislation in free trade agreements to be brought in 'through the back door' e.g. in the case of the TTIP (Investment Courts overriding the national judiciary, circumvention …	On behalf of the REFIT Platform, thank you for submitting your suggestion on the efficiency, effectiveness or burden reduction of EU regulation or its implementation by Member States. The Platform has concluded that it does not intend to prepare an opinion on the issues raised because of the "Trade for all" Communication (http://trade.ec.europa.eu/doclib/docs/2015/october/tradoc_153846.pdf, relea…	On behalf of the REFIT Platform, thank you for submitting your suggestion on the efficiency, effectiveness or burden reduction of EU regulation or its implementation by Member States. The Platform has concluded that it does not intend to prepare an opinion on the issues raised because of the "Trade for all" Communication (http://trade.ec.europa.eu/doclib/docs/2015/october/tradoc_153846.pdf, relea…	Evidence	1	Increase	0	1	Competence	DE	0.0707849	0.885775	0.00500884	0.0061085	0.0137156	0.00692198	0.00494822	0.00673729
e176	Y2016	2016-01-10	EU citizen	Citizen	United Kingdom	When I visited Berlin in 2008 from Scotland, I noticed and went into a European Shop which had information available and computers which were accessible on European issues. I live in Inverness and did previously live in Edinburgh and London. I have never seen this facility in any city in the UK. Can we have shops / European information portal in every city in UK/Europe as a shop in city centure w…	When I visited Berlin in 2008 from Scotland, I noticed and went into a European Shop which had information available and computers which were accessible on European issues. I live in Inverness and did previously live in Edinburgh and London. I have never seen this facility in any city in the UK. Can we have shops / European information portal in every city in UK/Europe as a shop in city centure w…			Opinion	0	Increase	0	0		EN	0.00855551	0.0172934	0.0195984	0.0124445	0.00768663	0.398008	0.48175	0.0546631
e177	Y2016	2016-01-14	EU citizen	Citizen	Belgium	la mise en place des prélèvements SEPA .Le consommateur n'est plus protégé (DOM80).Le contrôle de nos domiciliations est passé aux mains des bénéficiaires.la banque n'a plus le rôle d'intermédiaire.Le constat est réel car je l'est vécu et mis un peu de temps pour comprendre.Ce changement est passé discrètement.Les banques n'ont pas assez insisté sur ce GRAND changement qui peut nuire à leurs clie…	the implementation of SEPA direct debits. The consumer is no longer protected (DOM80). The control of our direct debits has passed into the hands of the beneficiaries. the bank no longer has the role of intermediary. The observation is real because I 'is lived and taken a little time to understand. This change has happened discreetly. The banks have not insisted enough on this BIG change which ca…			Opinion	0	Increase	0	0		FR	0.0312961	0.441174	0.234062	0.0207086	0.0218	0.0303953	0.114763	0.105801
e178	Y2016	2016-01-17	EU citizen	Citizen	Finland	The so called "cookie law" is totally stupid. It does not really stop any kind of tracking. There are dozens of ways to track browsers without cookies, and cookies are one of the easiest to block in the browser. The cookie law as currently implemented just stops people from blocking the cookies for real, as in this case the annoying popups will just reopen every time.	The so called "cookie law" is totally stupid. It does not really stop any kind of tracking. There are dozens of ways to track browsers without cookies, and cookies are one of the easiest to block in the browser. The cookie law as currently implemented just stops people from blocking the cookies for real, as in this case the annoying popups will just reopen every time.			Opinion	0	Reduce	1	0		EN	0.014878	0.0229454	0.0172378	0.0174161	0.00783543	0.0396458	0.0259763	0.854065
e180	Y2016	2016-01-25	EU citizen	Citizen	Spain	In April 2014 the EU Commission presented its proposal for the European single-member company Societas Unius Personae (SUP), which not only affects companies, start-ups and national standards in corporate law, but also endangers workers’ participation rights. Member States and the European Parliament have not found yet a common solution. If the proposal were adopted as proposed by the EU Commissi…	In April 2014 the EU Commission presented its proposal for the European single-member company Societas Unius Personae (SUP), which not only affects companies, start-ups and national standards in corporate law, but also endangers workers’ participation rights. Member States and the European Parliament have not found yet a common solution. If the proposal were adopted as proposed by the EU Commissi…			Evidence	1	Reduce	1	0		EN	0.264873	0.305988	0.0208917	0.278082	0.0202351	0.0288417	0.0652467	0.0158423
e181	Y2016	2016-01-26	EU citizen	Citizen	Belgium	I am concerned by the discrimination of all non-English speakers that cannot have their say under this "Have you say" initiative, which de facto disenfranchises five sixths of the EU population as second-class citizens.	I am concerned by the discrimination of all non-English speakers that cannot have their say under this "Have you say" initiative, which de facto disenfranchises five sixths of the EU population as second-class citizens.	Thank you for your submission on our website 'Lighten the load – Have your say'. This website is dedicated to collect views on how to make EU laws more effective and efficient, to identify actions for simplification and reduction of regulatory burden. We are happy to inform you that the 'Lighten the load – Have your say' submission form is available in all EU languages. You can find further infor…	Thank you for your submission on our website 'Lighten the load – Have your say'. This website is dedicated to collect views on how to make EU laws more effective and efficient, to identify actions for simplification and reduction of regulatory burden. We are happy to inform you that the 'Lighten the load – Have your say' submission form is available in all EU languages. You can find further infor…	Opinion	0	Neutral	0	1	Procedural	EN	0.0202737	0.0494344	0.246667	0.215766	0.0207593	0.33146	0.047762	0.0678777
e183	Y2016	2016-01-26	Other	Citizen	Sweden	Dear Sirs and Madams, I and Professor William Hogland have published the attached paper on how to ensure the flow of the Gulf Stream. If it stops, Scandinavia has to be evacuated. We give the EU Comission a flexible tool for monitoring, managing and evaluating ocean currents. Euros are used throughout, hence encapsulating for example the very kind of technical solutions chosen. Please, study the …	Dear Sirs and Madams, I and Professor William Hogland have published the attached paper on how to ensure the flow of the Gulf Stream. If it stops, Scandinavia has to be evacuated. We give the EU Comission a flexible tool for monitoring, managing and evaluating ocean currents. Euros are used throughout, hence encapsulating for example the very kind of technical solutions chosen. Please, study the …			Evidence	1	Increase	0	0		EN	0.0424548	0.109064	0.155822	0.266272	0.0388096	0.039592	0.249144	0.0988411
e184	Y2016	2016-01-26	EU citizen	Citizen	United Kingdom	1.I want Britain to have the House of Lords be the highest court in the Land and not be overruled on any matter by the European Court. This is a concern. 2. I want Britain have the right to who choose who from EEC enters any country in The EEC. We do not want those with criminal records in my (or country even with EEC passports). 3. The level of corruption by EEC council ministers and their famil…	1.I want Britain to have the House of Lords be the highest court in the Land and not be overruled on any matter by the European Court. This is a concern. 2. I want Britain have the right to who choose who from EEC enters any country in The EEC. We do not want those with criminal records in my (or country even with EEC passports). 3. The level of corruption by EEC council ministers and their famil…			Opinion	0	Reduce	1	0		EN	0.00641967	0.0111724	0.0099389	0.00832978	0.00552622	0.851218	0.00894932	0.0984461
e185	Y2016	2016-01-27	EU citizen	Citizen	France	Bonjour, si j'ai bien compris, on peut s'exprimer dans toutes les langues européennes pour vous faire part de nos remarques ou suggestions... Je trouverais plus judicieux et plus engageant que toutes les langues européennes soient proposées en amont, représentées par tous les drapeaux correspondants... Il est déjà très compliqué pour un citoyen lambda (français en tout cas) de comprendre quoi rép…	Hello, if I understood correctly, we can speak in all European languages to share our comments or suggestions with you ... I would find it wiser and more engaging if all European languages were offered upstream, represented by all the corresponding flags ... It is already very complicated for an average citizen (French in any case) to understand what to answer in the boxes of this questionnaire .…			Opinion	0	Neutral	0	0		FR	0.012987	0.0208702	0.0197379	0.01911	0.00893022	0.269104	0.563991	0.08527
e187	Y2016	2016-01-28	NGO	Non-business org	Belgium	IMPLEMENTATION AND ENFORCEMENT OF THE REACH AUTHORISATION PROCESS Since REACH was approved in 2006, substantial progress in the management of chemicals has been achieved in Europe, bringing about many positive changes to companies’ competitiveness and their capacity to innovate. The REACH Authorisation process is vital to ensuring the phase out and substitution of SVHC by safer alternatives, the …	IMPLEMENTATION AND ENFORCEMENT OF THE REACH AUTHORISATION PROCESS Since REACH was approved in 2006, substantial progress in the management of chemicals has been achieved in Europe, bringing about many positive changes to companies’ competitiveness and their capacity to innovate. The REACH Authorisation process is vital to ensuring the phase out and substitution of SVHC by safer alternatives, the …			Evidence	1	Reduce	1	0		EN	0.00686919	0.581247	0.00435152	0.0794226	0.30474	0.00537573	0.0126005	0.00539358
e192	Y2016	2016-01-31	EU citizen	Citizen	Greece	Subject:THE 'MIND HACKING' SPYING NSA's TECHNOLOGY/PROJECT IN EU .ITS IMPLICATIONS UPON SECURITY,PERSONAL DATA,CIVIL LIBERTIES and HUMAN RIGHTS CITIZENS IN EUROPE. Gentlemen/Sir very probably you are Unaware of the Exertion of this Spying Method of REMOTELY RETRIE VING INFORMATION out of the affec ted Person ,been him a CIVILIAN or POLITICIAN even STATE LEADER . Technical details will be discusse…	Subject:THE 'MIND HACKING' SPYING NSA's TECHNOLOGY/PROJECT IN EU .ITS IMPLICATIONS UPON SECURITY,PERSONAL DATA,CIVIL LIBERTIES and HUMAN RIGHTS CITIZENS IN EUROPE. Gentlemen/Sir very probably you are Unaware of the Exertion of this Spying Method of REMOTELY RETRIE VING INFORMATION out of the affec ted Person ,been him a CIVILIAN or POLITICIAN even STATE LEADER . Technical details will be discusse…			Opinion	0	Neutral	0	0		EN	0.0123823	0.0184238	0.0207202	0.40604	0.0339911	0.129942	0.155451	0.223049
e194	Y2016	2016-02-01	EU citizen	Citizen	Belgium	A harmonized (and coordinated) European pension system for the Europaen citizens who work in many European countries in their careers and must handle the huge burden of dealing with several Member State rules and legislations when they reach the age of pension. A simple solution is that the last country where the citizen finished his career, coordinates with all other European countries to provid…	A harmonized (and coordinated) European pension system for the Europaen citizens who work in many European countries in their careers and must handle the huge burden of dealing with several Member State rules and legislations when they reach the age of pension. A simple solution is that the last country where the citizen finished his career, coordinates with all other European countries to provid…			Evidence	1	Harmonization	0	0		EN	0.0322705	0.113527	0.023936	0.0330652	0.0276788	0.683519	0.0537144	0.0322884
e195	Y2016	2016-02-01	Public authority	Non-business org	Germany	Zum ersten sind Umfragen nur in einer Sprache wenig geeignet, gute Ergebnisse zu erziehlen. Es ist zu unterstellen, dass dies auch nicht geplant ist. Zum zweiten verhindert das Beihilferecht und dessen unsystematische Normierung eine Fülle von Maßnahmen. Wenn die Rahmen und die Freistellungen in sich stimmig abgestimmt wären und eine durchgänge Normierung erreicht würde, könnte es möglicherweise …	For the first surveys are not well suited to erziehlen good results in only one language . It is to assume that this is also not planned . Secondly, the state aid law and its unsystematic standardization prevents an abundance of activities . If the frame and the waivers were coordinated internally consistent and passages normalization would be reached , it could possibly eventually give a comment…			Opinion	0	Reduce	1	0		DE	0.0137638	0.0277786	0.059713	0.0339766	0.0104881	0.448612	0.336499	0.0691688
e196	Y2016	2016-02-01	EU citizen	Citizen	Austria	Ich finde es gut, dass telefonieren innerhalb der EU billiger geworden ist. Ebenfalls die Vereinfachung von Banküberweisungen innerhalb des EU-Raumes finde ich gut. Die Postgebühren sollten für die Versandtpost ebenfalls nachziehen und vereinheitlicht werden. Weniger zufrieden bin ich mit den derzeitigen Grenzkontrollen. Wo bleibt da der Schengenraum. Das Einkaufen beidseits der Grenzen zB Österr…	I think it's good that the phone has become cheaper in the EU . Also, the simplification of bank transfers within the EU area is good. The postal charges should be for the Sent Mail also follow suit and unified. Less pleased I am with the current border controls . Where is the Schengen area . The shopping on both sides of the borders , for example in Austria and Germany is severely limited when t…			Opinion	0	Reduce	1	0		DE	0.0127798	0.018077	0.0178928	0.0152071	0.00824491	0.20132	0.480813	0.245665
e197	Y2016	2016-02-01	EU citizen	Citizen	Portugal	A imensa legislação comunitária deveria estar mais acessível ao cidadão comum, que se interessa e busca por questões comunitárias. Salvo melhor opinião, toda a regulamentação Comunitária, após três alterações, devia ter o diploma normativo completamente reproduzido na íntegra com a versão totalmente actualizada. Suggestion: Translation The immense Community legislation should be more accessible t…	The immense Community legislation should be more accessible to the ordinary citizen, who is interested and search for community issues.			Opinion	0	Increase	0	0		PT	0.0260925	0.0955884	0.024503	0.231202	0.106764	0.240528	0.228949	0.046373
e198	Y2016	2016-02-02	EU citizen	Citizen	Italy	ASSIGNMENT AND ENLARGEMENT OF EU SOVEREIGNTY G206 SOCIAL MARKET ECONOMY"	To the best opinion, all the Community rules , after three changes , should have the regulatory text completely reproduced in full with the fully updated version."			Opinion	0	Increase	0	0		EN	0.0312317	0.0725706	0.0144036	0.0402383	0.245459	0.0331745	0.527582	0.0353406
e200	Y2016	2016-02-03	EU citizen	Citizen	Brazil	Estamos sendo mortos no Brasil,não temos hospitais atendendo a população com o mínimo de dignidade,falta esparadrapo,seringas,gazes,remédio etc...a corrupção e tão grande que estao fechando os hospitais no rio de janeiro.um dos últimos absurdo foi uma mulher que retornou de um hospital sem atendimento por falta de material pros médicos poderem trabalhar,sendo que ela esta grávida com e já se sabe…	We are being killed in Brazil , we do not have hospitals serving the population with a minimum of dignity , lack tape , syringes , gauze , medicine etc ... corruption and so great who are closing hospitals in janeiro.um River was the last absurd a woman who returned from a hospital without care for lack of medical pros stuff can work , and she is pregnant with and we know that the child has many …			Opinion	0	Increase	0	0		PT	0.00694458	0.0166617	0.910936	0.00813498	0.00257518	0.0177278	0.0121373	0.0248824
e202	Y2016	2016-02-08	EU citizen	Citizen	Netherlands	It is not about the amount of rules...it is about the quality and their goals!!	It is not about the amount of rules...it is about the quality and their goals!!			Opinion	0	Neutral	0	0		EN	0.0448056	0.680563	0.0349185	0.0393885	0.0543991	0.0495501	0.0420341	0.0543415
e203	Y2016	2016-02-09	EU citizen	Citizen	Ireland	In my capacity as an energy I would like to play a positive role in providing for the next generation through new forms of energy and improvement in technology and grid systems. I would like to be involved in any legislation which impacts these topics.	In my capacity as an energy I would like to play a positive role in providing for the next generation through new forms of energy and improvement in technology and grid systems. I would like to be involved in any legislation which impacts these topics.			Opinion	0	Neutral	0	0		EN	0.0179724	0.653469	0.169969	0.0311948	0.0351763	0.0222717	0.0280268	0.0419199
e204	Y2016	2016-02-09	EU citizen	Citizen	Ireland	TTIP is a huge concern for me. This legislation is totally exclusive and does not look after the rights of european citizens and the future safety of our food, water, energy supplies and environment. I would like to be involved in any developments in this regard.	TTIP is a huge concern for me. This legislation is totally exclusive and does not look after the rights of european citizens and the future safety of our food, water, energy supplies and environment. I would like to be involved in any developments in this regard.			Opinion	0	Neutral	0	0		EN	0.0133028	0.772206	0.0285477	0.0149322	0.0219558	0.09035	0.0195152	0.0391903
e205	Y2016	2016-02-11	EU citizen	Citizen	Belgium	Dear Sir or Madam, I have found your webside "Lighten the load". As far as I understand I can only suggest removing of regulations here. Unfortunately I have not found a similar page where I can suggest more and better, so missing, regulations. Can you please tell me where I can found a comparable service of the Commission in this regard. Many thanks and regards Roland Kulke	Dear Sir or Madam, I have found your webside "Lighten the load". As far as I understand I can only suggest removing of regulations here. Unfortunately I have not found a similar page where I can suggest more and better, so missing, regulations. Can you please tell me where I can found a comparable service of the Commission in this regard. Many thanks and regards Roland Kulke	Thank you for your submission in the light the load – have your say. The lighten the load website is not about removing legislation but about ensuring that EU legislation is fit for purpose. If you have suggestions on how to improve the effectiveness and efficiency of existing legislation we would be very interested to hear about it. Kind regards,	Thank you for your submission in the light the load – have your say. The lighten the load website is not about removing legislation but about ensuring that EU legislation is fit for purpose. If you have suggestions on how to improve the effectiveness and efficiency of existing legislation we would be very interested to hear about it. Kind regards,	Opinion	0	Neutral	0	1	Competence	EN	0.0224491	0.0492223	0.0426163	0.523474	0.0272798	0.0517109	0.247703	0.0355451
e206	Y2016	2016-02-11	EU citizen	Citizen	France	Mijn opmerking gaat over de enorme hoeveelheid, vaak als "flauwekul regelgeving" gekwalificeerde wetten, inzake milieu, gezondheid/hygiëne enerzijds en het vreemd genoeg nog immer ontbrekende Europese/gezamenlijk beleid/harmonisatie op het gebied van belastingen, werkeloosheidsuitkering, minimumloon, pensioen/pensioenleeftijd et cetera. Kortom het nog immer ontbreken van een alle gebieden bestrij…	My comment is about the enormous amount of laws, often qualified as "rubbish regulations", on the environment, health / hygiene on the one hand and the strangely enough still missing European / joint policy / harmonization in the field of taxes, unemployment benefits, minimum wages, pension / retirement age etcetera. In short, the still lack of an all-spherical - true - European constitution. How…			Opinion	0	Reduce	1	0		NL	0.200615	0.105965	0.127247	0.0374238	0.072605	0.196067	0.0343335	0.225744
e208	Y2016	2016-02-13	EU citizen	Citizen	Cyprus	No vaccines, no school, no child benefits. Why in some European countries the laws of the vaccines mandatory and in another only recommended, for example in Bulgaria and Romania vaccines are mandatory and in Sweden, German, Cyprus are recommended? There is no equality but extreme discrimination shouldn't the laws in Europe be for all the Europe, secondly mandatory vaccination must never exist, th…	No vaccines, no school, no child benefits. Why in some European countries the laws of the vaccines mandatory and in another only recommended, for example in Bulgaria and Romania vaccines are mandatory and in Sweden, German, Cyprus are recommended? There is no equality but extreme discrimination shouldn't the laws in Europe be for all the Europe, secondly mandatory vaccination must never exist, th…			Opinion	0	Reduce	1	0		EN	0.00959754	0.0596704	0.338151	0.0299097	0.0105639	0.453809	0.0672563	0.0310427
e210	Y2016	2016-02-15	EU citizen	Citizen	Romania	I am concerned that the EU decision-making system becomes less and less democratic through the consolidation of the institutions that represent governments of Member-states. I am concerned about the proliferation of new agencies which are not accountable to the citizens and about the increasing lack of transparency of the decision-making system. This cannot be solved through more consultation, be…	I am concerned that the EU decision-making system becomes less and less democratic through the consolidation of the institutions that represent governments of Member-states. I am concerned about the proliferation of new agencies which are not accountable to the citizens and about the increasing lack of transparency of the decision-making system. This cannot be solved through more consultation, be…			Opinion	0	Reduce	1	0		EN	0.0235308	0.0723026	0.0346412	0.397311	0.0291224	0.215234	0.186365	0.0414926
e211	Y2016	2016-02-16	EU citizen	Citizen	Germany	The new better regulation reform is going to install a so-called regulatory scrutiny board in order to check up proposals made by the commission. In your planning you describe scenarios where the rbs is allowed to call for an ad-hoc expertise containing of persons with special knowledge of a certain topic. But which criteria do you use for choosing those persons. I see an extreme lack of transpar…	The new better regulation reform is going to install a so-called regulatory scrutiny board in order to check up proposals made by the commission. In your planning you describe scenarios where the rbs is allowed to call for an ad-hoc expertise containing of persons with special knowledge of a certain topic. But which criteria do you use for choosing those persons. I see an extreme lack of transpar…	Thank you for your submission in the lighten the load – have your say. The Regulatory Scrutiny Board will have the possibility to call on expertise from a variety of sources including the Commission departments, Commission officials or external experts for ad-hoc advice. Although it is likely to be an exceptional measure, if it were to be decided that external expertise is needed for a particular…	Thank you for your submission in the lighten the load – have your say. The Regulatory Scrutiny Board will have the possibility to call on expertise from a variety of sources including the Commission departments, Commission officials or external experts for ad-hoc advice. Although it is likely to be an exceptional measure, if it were to be decided that external expertise is needed for a particular…	Opinion	0	Neutral	0	1	Procedural	EN	0.0182439	0.127121	0.252334	0.0868397	0.233845	0.0435623	0.177641	0.0604137
e213	Y2016	2016-02-17	NGO	Non-business org	Belgium	The application of Regulations 883/2004 and 987/2009.	The application of Regulations 883/2004 and 987/2009.	On behalf of the REFIT Platform, we would like to inform you that on 21 September 2017 the REFIT Platform has adopted an opinion on your suggestion regarding the EU Regulations on social security coordination (REFIT Platform ref. VII.5.a). The adopted Opinion has also been published on the REFIT Platform's website . The follow-up to this adopted opinion will be made in the context of the preparat…	On behalf of the REFIT Platform, we would like to inform you that on 21 September 2017 the REFIT Platform has adopted an opinion on your suggestion regarding the EU Regulations on social security coordination (REFIT Platform ref. VII.5.a). The adopted Opinion has also been published on the REFIT Platform's website . The follow-up to this adopted opinion will be made in the context of the preparat…	Evidence	1	Reduce	1	1	Adoption	EN	0.0487609	0.510159	0.0363537	0.0720978	0.158198	0.0550617	0.0577098	0.0616593
e215	Y2016	2016-02-18	Other	Citizen	France	Farmers are crushed by too much complexity. Too many rules that do not make sense. Everyone is lost in this system : farmers and advisors! We are in total absurdity. The rules must be largely simplified (ecological focus area especially)	Farmers are crushed by too much complexity. Too many rules that do not make sense. Everyone is lost in this system : farmers and advisors! We are in total absurdity. The rules must be largely simplified (ecological focus area especially)	Thank you for your email. May we kind ask you to provide us with some concrete examples and possible solutions to the issues you raised? Kind regards,	Thank you for your email. May we kind ask you to provide us with some concrete examples and possible solutions to the issues you raised? Kind regards,	Opinion	0	Reduce	1	1	Policy substantive	EN	0.222525	0.595657	0.0278745	0.0226219	0.0332092	0.0333651	0.0242811	0.0404661
e216	Y2016	2016-02-18	Other	Citizen	Portugal	Bom Dia, Eu sou Segurança, e venho pedir ajuda ao Ministério da Saúde porque isto e um caso de Saúde Publica, andarem a levar os Seguranças ou seus extremos na Saúde Física e na Mental, chegando a ser tortura descabida, Por favor acabem com estas ideias Militaristas que fazem de Escravos os Seguranças Privados ao cansaço extremo Físico e Mental, porque o conceito do Segurança Privado e Vigiar no …	Good day, I'm Security, and I come to ask for help to the Ministry of Health as this and a case of Public Health, walk to lead the Securities or its extremes in Physical Health and Mental, becoming misplaced torture, Please end up with these militarists ideas that make slaves the Securities Private to extreme tiredness Physical and Mental, because the concept of Private and Monitor Security to yo…	Thank you for your message to the website 'Lighten the load – Have your say'. This website is dedicated to collect views on how to make EU laws more effective and efficient, to identify actions for simplification and reduction of regulatory burden. As your submission does not fall into the remit of the "lighten the load" webform, we will unfortunately not be able to follow up on it. Kind regards,	Thank you for your message to the website 'Lighten the load – Have your say'. This website is dedicated to collect views on how to make EU laws more effective and efficient, to identify actions for simplification and reduction of regulatory burden. As your submission does not fall into the remit of the "lighten the load" webform, we will unfortunately not be able to follow up on it. Kind regards,	Opinion	0	Increase	0	1	Competence	PT	0.00620997	0.00931078	0.0081498	0.00791777	0.00486109	0.0120413	0.723948	0.227561
e217	Y2016	2016-02-19	EU citizen	Citizen	Germany	Sehr geehrte Damen, sehr geehrte Herren, um Vorschläge zu unterbreiten wie und was zum Bürokratieabbau auf EU-Ebene beitragen kann, müsste man erst einmal wissen, wie der Bürokratieapperat auf EU-Ebene arbeit und was es er überhaupt ist. Viele Bürger und Bürgerinnen fehlt ganz einfach die notwendige Information. Hier wäre sinnvoll das die EU direkt an die Bürger herantritt und sie über ihre Arbei…	Ladies, Gentlemen, In order to submit proposals on how and what can contribute to reducing bureaucracy at EU level, one would first have to know how the bureaucracy apparatus works at EU level and what it actually is. Many citizens simply lack the necessary information. Here it would make sense for the EU to approach the citizens directly and inform them about its work. The information that a cit…			Opinion	0	Increase	0	0		DE	0.0391768	0.0380708	0.0237788	0.0212548	0.014456	0.185217	0.290388	0.387658
e219	Y2016	2016-02-20	EU citizen	Citizen	Italy	Inquinamento da limitare, uso di energie pulite (pannelli solari sui treni, macchine elettriche, pullman a idrogeno)	Pollution to be limited, use of clean energy (solar panels on trains, electric cars, hydrogen buses)			Opinion	0	Increase	0	0		IT	0.176082	0.314674	0.25585	0.0355093	0.0435648	0.0563168	0.0493989	0.0686051
e220	Y2016	2016-02-21	Company/business org	Business	Greece	In 2013 I returned from the UK to start my Landscape Practise in Drama, Greece. Since my family have spent all their savings for the education of me and my 2 brothers and sisters in a course of 20 years, I applied to recieve the only funding available at that time to start my professional life. I got a EU-grant of only 10.000 Euros for a 12 month period, which I thought that it was a great start.…	In 2013 I returned from the UK to start my Landscape Practise in Drama, Greece. Since my family have spent all their savings for the education of me and my 2 brothers and sisters in a course of 20 years, I applied to recieve the only funding available at that time to start my professional life. I got a EU-grant of only 10.000 Euros for a 12 month period, which I thought that it was a great start.…	Thank you very much for sharing with us your experience. The European Commission considers simplification to be an important issue and it has set a High Level Group of independent experts on Simplification. The new group aims to reduce the administrative burden for beneficiaries to access the five European Structural and Investment Funds, contributing to the Commission's broader efforts for Bette…	Thank you very much for sharing with us your experience. The European Commission considers simplification to be an important issue and it has set a High Level Group of independent experts on Simplification. The new group aims to reduce the administrative burden for beneficiaries to access the five European Structural and Investment Funds, contributing to the Commission's broader efforts for Bette…	Evidence	1	Reduce	1	1	Competence	EN	0.0383155	0.00983297	0.0703078	0.00801625	0.00333964	0.016822	0.282034	0.571332
e221	Y2016	2016-02-23	Business association	Business	Netherlands	"Verschillende voorbeelden van elementen van wetgeving die de Detailhandel in Nederland als disproportionele administratieve last ervaart "	Several examples of elements of legislation that the retail trade in the Netherlands experiences as a disproportionate administrative burden			Opinion	0	Reduce	1	0		NL	0.0350745	0.401611	0.0253654	0.0405652	0.164947	0.048937	0.244174	0.0393247
e222	Y2016	2016-02-24	Other	Citizen	Austria	Mit dem Hygienepaket (EG-VO 852/2004 ff.) sind umfangreiche Regelungen zum Schutz von Lebensmitteln vor unerwünschten Einflüssen erlassen wurden, insbesondere die Kühlkette betreffend. Mit der EU-LebensmittelinformationsVO 1169/2011 wurden umfassende Regelungen über die Informationspflichten zu Lebensmitteln erlassen, insbesondere deren Verwendung und Lagerung betreffend. Diese Aspekte betreffen …	The hygiene package (EC Regulation 852/2004 ff.) Provides extensive regulations for the protection of foodstuffs against unwanted influences, in particular concerning the cold chain. The EU Food Information Ordinance 1169/2011 laid down comprehensive regulations on food information requirements, in particular their use and storage. These aspects also concern the content of Directive 89/108 / EEC …	21 March 2019. We would like to inform you that on 14 March the REFIT Platform has adopted one opinion on your suggestion on ‘The Hygiene Package’ (REFIT Platform ref. XI.16.a) The adopted Opinion is attached to this e-mail and has also been published on the REFIT Platform's website (https://ec.europa.eu/info/files/refit-platform-recommendations-health-an... ) The follow-up to this adopted opinio…	21 March 2019. We would like to inform you that on 14 March the REFIT Platform has adopted one opinion on your suggestion on ‘The Hygiene Package’ (REFIT Platform ref. XI.16.a) The adopted Opinion is attached to this e-mail and has also been published on the REFIT Platform's website (https://ec.europa.eu/info/files/refit-platform-recommendations-health-an... ) The follow-up to this adopted opinio…	Evidence	1	Reduce	1	1	Adoption	DE	0.015892	0.137692	0.00468311	0.0421164	0.749851	0.0191277	0.0172051	0.0134329
e224	Y2016	2016-02-26	EU citizen	Citizen	Spain	Cultural Heritage matters shall be a fully competence of EU. Villages as Sasamón (Spain) has a big amount of monuments. The regional authorities of Castilla y León, despite they say that they are investing money (not true), the reality is other one. Sasamón Cultural Heritage has really serious problems with the status and conservation of the Cultural Heritage. As an example, Arco de San Miguel an…	Cultural Heritage matters shall be a fully competence of EU. Villages as Sasamón (Spain) has a big amount of monuments. The regional authorities of Castilla y León, despite they say that they are investing money (not true), the reality is other one. Sasamón Cultural Heritage has really serious problems with the status and conservation of the Cultural Heritage. As an example, Arco de San Miguel an…			Opinion	0	Increase	0	0		EN	0.202275	0.0300257	0.0831729	0.0923161	0.0113404	0.34551	0.0634969	0.171863
e225	Y2016	2016-02-27	Company/business org	Business	France	Il n'existe pas, en EUROPE? de moyens, de financer en fonds propres avec l'épargne des particuliers de proximité ou régional,les TPE (à partir de quatre salariés) et les PME qui ont un réel potentiel de croissance et de créations d'emplois.De ce fait la majeure partie de ces entreprises disparaissent du fait de leurs ambitions, par manque de fonds propres. Suggestion: Le CiiB lance une augmentati…	There are no means in EUROPE? To finance in equity with the savings of local or regional individuals, very small businesses (from four employees) and SMEs which have a real potential for growth and job creation. As a result, most of these companies disappear because of their ambitions, for lack of equity. Suggestion: The CiiB is launching a capital increase of € 2.4 million to develop a concept o…			Opinion	0	Increase	0	0		FR	0.0207999	0.0597137	0.029037	0.160756	0.0586028	0.0317197	0.424279	0.215093
e226	Y2016	2016-02-29	Other	Citizen	Austria	In der V (EG) Nr. 1169/2011/ Anhang XV ist im Rahmen der verpflichtenden Nährwertkennzeichnung u.a. eine abschließende Auflistung der Gehalte an Kohlenhydraten/Zuckern (in g/100g) festgelegt worden. In der RICHTLINIE 2001/111/EG wird jedoch noch immer folgende Angabe gefordert: Art. 2 3. Bei Flüssigzucker, Invertflüssigzucker und Invertzuckersirup ist in der Etikettierung der Gehalt an Trockenmas…	In V (EG) No. 1169/2011 / Annex XV, a final list of the carbohydrate / sugar content (in g / 100g) has been laid down as part of the mandatory nutritional labeling. In DIRECTIVE 2001/111 / EC, however, the following information is still required: Art. 2 3. For liquid sugar, invert liquid sugar and invert sugar syrup is on the label the dry matter content and Specify invert sugar (in percent by we…	Dear Sir, On behalf of the REFIT Platform, thank you for submitting your suggestion on the efficiency, effectiveness or burden reduction of EU regulation or its implementation by Member States. The Platform has concluded that it does not intend to prepare an opinion on the issues raised. This is because the issues are covered by an EU legislative measure which only entered into application less t…	Dear Sir, On behalf of the REFIT Platform, thank you for submitting your suggestion on the efficiency, effectiveness or burden reduction of EU regulation or its implementation by Member States. The Platform has concluded that it does not intend to prepare an opinion on the issues raised. This is because the issues are covered by an EU legislative measure which only entered into application less t…	Evidence	1	Reduce	1	1	Procedural	DE	0.00567332	0.0215454	0.00113076	0.011899	0.946511	0.0031413	0.00648733	0.00361205
e227	Y2016	2016-02-29	EU citizen	Citizen	Germany	please work either in strassburg or in brüssel- stop this travelling circus	please work either in strassburg or in brüssel- stop this travelling circus			Opinion	0	Reduce	1	0		EN	0.0335939	0.0544295	0.0354902	0.0335092	0.021921	0.0880861	0.141846	0.591125
e228	Y2016	2016-03-01	EU citizen	Citizen	Belgium	Beaucoup de documents issus de la plateforme REFIT et de l'UE en général sont uniquement édité en anglais. Beaucoup de monde en Europe ne parle pas couramment cette langue. Pour intéresser le citoyen, il faudrait que chacun puisse lire les publications dans sa langue maternelle.	Many documents from the REFIT platform and from the EU in general are only edited in English. Many people in Europe do not speak this language fluently. To interest citizens, everyone should be able to read the publications in their mother tongue.			Opinion	0	Neutral	0	0		FR	0.0170315	0.0950772	0.0439418	0.021495	0.0138573	0.569878	0.0461497	0.192569
e229	Y2016	2016-03-01	EU citizen	Citizen	Italy	1) I think the Commission should go further with its Better Regulation agenda by trying to create "Codes" more than several legislative instruments that does not simplify citizens and undertakings in understanding the relevant European legal framework. For instance, it would be useful to create a proper State Aid Code (with Regulations, Guidelines and Notices) in the context of the State Aid Mode…	1) I think the Commission should go further with its Better Regulation agenda by trying to create "Codes" more than several legislative instruments that does not simplify citizens and undertakings in understanding the relevant European legal framework. For instance, it would be useful to create a proper State Aid Code (with Regulations, Guidelines and Notices) in the context of the State Aid Mode…			Opinion	0	Reduce	1	0		EN	0.0148537	0.0918505	0.034389	0.126994	0.163956	0.356448	0.127475	0.0840339
e231	Y2016	2016-03-01	EU citizen	Citizen	Ireland	since when did Germany become the leaders of the EU , and we need a EU wide vote on refugees ,as for Germany to dare to try to make us responsible for Islam is the biggest joke in history ,	since when did Germany become the leaders of the EU , and we need a EU wide vote on refugees ,as for Germany to dare to try to make us responsible for Islam is the biggest joke in history ,			Opinion	0	Increase	0	0		EN	0.0159956	0.0271189	0.0296161	0.0183792	0.00889686	0.390512	0.0587355	0.450746
e232	Y2016	2016-03-03	Other	Citizen	Germany	Hallo, wäre schön, wenn diese Seite auch in deutsch vorhanden wäre. Mit freundlichen Grüßen Dietmar Schulze Suggestion: Hello , would be nice if this site would be available also in German . Yours sincerely Dietmar Schulze	Hello , would be nice if this site would be available also in German . Yours sincerely Dietmar Schulze"	Die web Seite ist in Deutsch vorhanden. Bitte folgen sie dem Link (http://ec.europa.eu/smart-regulation/refit/index_de.htm) der sie dort hinbringen wird Mit freundlichen Grüssen,	The website is available in German. Please follow the link (http://ec.europa.eu/smart-regulation/refit/index_de.htm) that will take you there Yours sincerely,	Opinion	0	Neutral	0	1	Procedural	DE	0.0257558	0.0738889	0.0397246	0.0441704	0.0279896	0.20247	0.461331	0.12467
e233	Y2016	2016-03-04	Public authority	Non-business org	Belgium	L.S., As Head of the JS of a Interreg Crossborder programme (CBC Flanders-the Netherlands), I'd like to suggest some concrete simplification suggestions for structural funds, in the annex. I hope it is not problematic our suggestions are in dutch. best regards, Bram de Kort - Interreg Flanders - The Netherlands	L.S., As Head of the JS of a Interreg Crossborder programme (CBC Flanders-the Netherlands), I'd like to suggest some concrete simplification suggestions for structural funds, in the annex. I hope it is not problematic our suggestions are in dutch. best regards, Bram de Kort - Interreg Flanders - The Netherlands			Evidence	1	Reduce	1	0		EN	0.0306902	0.0514339	0.0188497	0.0449639	0.147594	0.0542408	0.156915	0.495312
e234	Y2016	2016-03-04	EU citizen	Citizen	Germany	Die geballte Kraft der EU, mit ihrer Subventionsförderung unterbindet die Chancen kleiner Länder bei deren Wirtschaftspolitik. Es sollte mit diesen Ländern gemeinsam ausgelotet werden. Was dient der gemeinsamen Entwicklung. Wo ist auf beiden Seiten das Prinzip geben und nehmen gewährleistet?	The concentrated power of the EU, with its subsidy funding, prevents small countries from having chances in their economic policy. It should be explored together with these countries. What serves the common development. Where is the give and take principle guaranteed on both sides?			Opinion	0	Harmonization	0	0		DE	0.0242481	0.0397507	0.0244354	0.0288263	0.0152513	0.495889	0.0316549	0.339945
e235	Y2016	2016-03-07	Public authority	Non-business org	Latvia	Consumer Rights Protection Centre of Latvia comments on STAKEHOLDER SUGGESTIONS - CONSUMER POLICY	Consumer Rights Protection Centre of Latvia comments on STAKEHOLDER SUGGESTIONS - CONSUMER POLICY			Evidence	1	Increase	0	0		EN	0.322691	0.449408	0.0348514	0.0296488	0.0455393	0.0436691	0.0289316	0.0452605
e236	Y2016	2016-03-08	Other	Citizen	Germany	See attachment and https://www.foeeurope.org/fracking-business-as-usual-061015.	See attachment and https://www.foeeurope.org/fracking-business-as-usual-061015.			Evidence	1	Increase	0	0		EN	0.0469286	0.124904	0.026038	0.327583	0.297323	0.0562775	0.0652913	0.0556546
e237	Y2016	2016-03-11	EU citizen	Citizen	Netherlands	Binnen de EU moeten bedrijven een erkenning hebben om producten van dierlijke oorsprong te kunnen verhandelen. Mijn verzoek is om de erkenningen te schrappen en de bouwkundige eisen, hygiëne eisen en HACCP eisen te behouden. Door het schrappen van de EU erkenning vervallen veel administratieve hindernissen die voor de volksgezondheid niet van belang zijn en de economie niet stimuleren. Bovendien …	Within the EU, companies must have an approval to market products of animal origin. My request is to delete the acknowledgments and maintain the design requirements, hygiene standards and HACCP requirements. By deleting the EU approval expired many administrative barriers to human health are not important and do not stimulate the economy.	We are pleased to inform you that in June 2018 the REFIT Platform has adopted an opinion on your suggestion regarding the (REFIT Platform ref. XI.16.b ) The adopted Opinion is attached to this e-mail and has also been published on the REFIT Platform's website.	We are pleased to inform you that in June 2018 the REFIT Platform has adopted an opinion on your suggestion regarding the (REFIT Platform ref. XI.16.b ) The adopted Opinion is attached to this e-mail and has also been published on the REFIT Platform's website.	Evidence	1	Reduce	1	1	Adoption	NL	0.017606	0.376175	0.0109475	0.0349502	0.416359	0.0263417	0.0883215	0.0292989
e238	Y2016	2016-03-15	Company/business org	Business	United Kingdom	Radiocentre's concerns on behalf of the UK commercial radio industry relate to Article 4 of Consumer Credit Directive 2008/48/EC (CCD) which requires standard information to be provided in any credit advertising indicating an interest rate or cost of credit. This affects advertising for financial services, retail and motors, typically adding 12-15 seconds of airtime to a radio advert. Our concern…	Radiocentre's concerns on behalf of the UK commercial radio industry relate to Article 4 of Consumer Credit Directive 2008/48/EC (CCD) which requires standard information to be provided in any credit advertising indicating an interest rate or cost of credit. This affects advertising for financial services, retail and motors, typically adding 12-15 seconds of airtime to a radio advert. Our concern…	On behalf of the REFIT Platform, we would like to inform you that on 21 September 2017 the REFIT Platform has adopted an opinion on your suggestion regarding the Directive on Credit Agreements for Consumers (REFIT Platform ref.VI.4.a). The adopted Opinion is attached to this e-mail and has also been published on the REFIT Platform's website . The follow-up to this adopted opinion will be made in …	On behalf of the REFIT Platform, we would like to inform you that on 21 September 2017 the REFIT Platform has adopted an opinion on your suggestion regarding the Directive on Credit Agreements for Consumers (REFIT Platform ref.VI.4.a). The adopted Opinion is attached to this e-mail and has also been published on the REFIT Platform's website . The follow-up to this adopted opinion will be made in …	Evidence	1	Reduce	1	1	Adoption	EN	0.0225306	0.602163	0.121605	0.0325849	0.109219	0.0367895	0.0367001	0.0384073
e239	Y2016	2016-03-15	Other	Citizen	Belgium	On behalf of NEON, the National energy ombudsmen network, I would like to express our great interest in participating in the consultations and events organized in the framework of the REFIT Fitness Check of consumer law. As independent energy ombudsmen, our members deal on a daily basis with the issues to be examined during this fitness check.	On behalf of NEON, the National energy ombudsmen network, I would like to express our great interest in participating in the consultations and events organized in the framework of the REFIT Fitness Check of consumer law. As independent energy ombudsmen, our members deal on a daily basis with the issues to be examined during this fitness check.	Many thanks for informing us of your interest in the REFIT Fitness Check of Consumer Law. Your interest has been forwarded to the responsible services of the European Commission. Kind regards,	Many thanks for informing us of your interest in the REFIT Fitness Check of Consumer Law. Your interest has been forwarded to the responsible services of the European Commission. Kind regards,	Opinion	0	Neutral	0	1	Competence	EN	0.0223781	0.46299	0.207721	0.05749	0.0218478	0.0692042	0.115954	0.0424155
e240	Y2016	2016-03-15	Business association	Business	France	The directives used by the Commission as the normative tool for program REFIT often use terms that leave room for interpretation and /or case by case assessment, and member states are granted flexibility to transpose them in their national legislation. This does not fit the purpose of REFIT, which is to make EU law simpler, and to contribute to a clear, stable and predictable regulatory framework…	The directives used by the Commission as the normative tool for program REFIT often use terms that leave room for interpretation and /or case by case assessment, and member states are granted flexibility to transpose them in their national legislation. This does not fit the purpose of REFIT, which is to make EU law simpler, and to contribute to a clear, stable and predictable regulatory framework…	On behalf of the REFIT Platform, thank you for submitting your suggestion on the efficiency, effectiveness or burden reduction of EU regulation or its implementation by Member States. The Platform has concluded that it does not intend to prepare an opinion on the issues raised. This is because the ECJ has ruled in the past on a national ban concerning "sales at a loss" stating that it is in breac…	On behalf of the REFIT Platform, thank you for submitting your suggestion on the efficiency, effectiveness or burden reduction of EU regulation or its implementation by Member States. The Platform has concluded that it does not intend to prepare an opinion on the issues raised. This is because the ECJ has ruled in the past on a national ban concerning "sales at a loss" stating that it is in breac…	Evidence	1	Harmonization	0	1	Procedural	EN	0.0231151	0.808356	0.00635619	0.00997789	0.0207285	0.113125	0.00781919	0.0105218
e241	Y2016	2016-03-20	EU citizen	Citizen	France	We run two 9 seat vehicles for airport transfers and have to have the same professional qualifications as a company running 400 coaches. This is an unnecessary cost for a small business and puts us at unfair competition with illegal operators.	We run two 9 seat vehicles for airport transfers and have to have the same professional qualifications as a company running 400 coaches. This is an unnecessary cost for a small business and puts us at unfair competition with illegal operators.	On behalf of the REFIT Platform, thank you for submitting your suggestion on the efficiency, effectiveness or burden reduction of EU regulation or its implementation by Member States. The Platform has concluded that it does not intend to prepare an opinion on the issues raised. This decision is based on the fact that the matter that you raise is a competence of the Member States and falls beyond …	On behalf of the REFIT Platform, thank you for submitting your suggestion on the efficiency, effectiveness or burden reduction of EU regulation or its implementation by Member States. The Platform has concluded that it does not intend to prepare an opinion on the issues raised. This decision is based on the fact that the matter that you raise is a competence of the Member States and falls beyond …	Evidence	1	Reduce	1	1	Policy substantive	EN	0.0707807	0.143813	0.0149775	0.0266331	0.32217	0.0269601	0.0416324	0.353034
e242	Y2016	2016-03-20	EU citizen	Citizen	Sweden	jag vill att eu går tillbaka till normaltid det är inte normalt att manipulera med tiden på detta sätt	i want the eu to go back to normal time it is not normal to manipulate time in this way			Opinion	0	Reduce	1	0		SE	0.0193658	0.0251201	0.0227454	0.0129467	0.0085653	0.0432186	0.0315073	0.836531
e243	Y2016	2016-03-22	Consumer org	Non-business org	Germany	The number of vegans, vegetarians and people turning to more plant-based lifestyles is steadily increasing. Food producers, food trading companies and caterers have responded by bringing an increasing amount of vegetarian and vegan products to the market. Consumer protection organisations and vegan/vegetarian associations and societies have noticed that commercial chains have begun to label their…	The number of vegans, vegetarians and people turning to more plant-based lifestyles is steadily increasing. Food producers, food trading companies and caterers have responded by bringing an increasing amount of vegetarian and vegan products to the market. Consumer protection organisations and vegan/vegetarian associations and societies have noticed that commercial chains have begun to label their…			Evidence	1	Increase	0	0		EN	0.0124641	0.798905	0.00355724	0.00905423	0.157568	0.00466005	0.00709686	0.00669461
e244	Y2016	2016-03-23	Trade union	Non-business org	Austria	Richtlinie über Gesellschaften mit beschränkter Haftung mit einem einzigen Gesellschafter Die Bundesarbeitskammer (BAK) ist die gesetzliche Interessenvertretung von rund 3,4 Millionen Arbeitnehmern und Konsumenten in Österreich und ist im EU-Transparenzregister unter der Nummer 23869471911-54 registriert. Der Richtlinienentwurf der EU-Kommission zur Ein-Personen-Gesellschaft (SUP) missachtet gese…	Single Partner Limited Company Directive The Federal Chamber of Labor (BAK) is the legal representation of the interests of around 3.4 million employees and consumers in Austria and is registered in the EU transparency register under the number 23869471911-54. The EU Commission's draft directive on the one-person society (SUP) disregards minimum social standards and promotes “forum shopping”, cre…	Dear Sir/Madame, On behalf of the REFIT Platform, thank you for submitting your suggestion on the efficiency, effectiveness or burden reduction of EU regulation or its implementation by Member States. The Platform has concluded that it does not intend to prepare an opinion on the issues raised. This is because the issues are currently being examined by the European Parliament and Council on a pro…	Dear Sir/Madame, On behalf of the REFIT Platform, thank you for submitting your suggestion on the efficiency, effectiveness or burden reduction of EU regulation or its implementation by Member States. The Platform has concluded that it does not intend to prepare an opinion on the issues raised. This is because the issues are currently being examined by the European Parliament and Council on a pro…	Evidence	1	Reduce	1	1	Competence	DE	0.464429	0.0230579	0.0185031	0.285084	0.0223722	0.0194613	0.0605913	0.106502
e245	Y2016	2016-03-29	EU citizen	Citizen	Belgium	Je trouve anormal que la Commission européenne (non représentative, non élue démocratiquement) conclue des accords avec des pays ne respectant pas nos propres lois en matière de santé, de sécurité alimentaire, de sécurité économique et d'éducation. Que vous permettiez à des lobbys de financer des partis pour faire passer en force des traités européens qui vont à l'encontre du bien-être de la popu…	I find it abnormal that the European Commission (not representative, not democratically elected) concludes agreements with countries which do not respect our own laws on health, food safety, economic security and education. That you allow lobbies to finance parties to force through European treaties that go against the well-being of the population (fine particles kill us thank you to the lobbies …			Opinion	0	Increase	0	0		FR	0.0213122	0.0374049	0.040566	0.0909305	0.111627	0.233478	0.0206231	0.444058
e246	Y2016	2016-04-01	EU citizen	Citizen	Netherlands	Collecting data by third american parties. For example Alphabet ,which is the mothercompany of You tube,google,google analytical tools. When a websiteowner chooses to work with an american third party and works with the software of Google analytical, then the impression is that the american company is disregarding the privacy act of Europe.They collect data,I have blocked that no information may …	Collecting data by third american parties. For example Alphabet ,which is the mothercompany of You tube,google,google analytical tools. When a websiteowner chooses to work with an american third party and works with the software of Google analytical, then the impression is that the american company is disregarding the privacy act of Europe.They collect data,I have blocked that no information may …			Opinion	0	Increase	0	0		EN	0.0089672	0.0164428	0.00725491	0.0155593	0.0642242	0.0190443	0.344689	0.523818
e247	Y2016	2016-04-04	Business association	Business	Germany	Many thanks for providing the possibility to give our view on how to make EU laws more effective and efficient. We would like to address three points (see attachment): The Nutrient Profiles pursuant to art. 4 of the Nutrition and Health Claims Regulation (EC) n° 1924/2006, the Country of Origin Labelling in relation to the Regulation (EU) n° 1169/2011 on the provision of food information to consu…	Many thanks for providing the possibility to give our view on how to make EU laws more effective and efficient. We would like to address three points (see attachment): The Nutrient Profiles pursuant to art. 4 of the Nutrition and Health Claims Regulation (EC) n° 1924/2006, the Country of Origin Labelling in relation to the Regulation (EU) n° 1169/2011 on the provision of food information to consu…	On behalf of the REFIT Platform, thank you for submitting your suggestion on the efficiency, effectiveness or burden reduction of EU regulation or its implementation by Member States. The REFIT Platform has reviewed your suggestion and divided it into two parts: 1. Ref XI.11.b -Nutrient Profiles pursuant to art. 4 of the Nutrition and Health Claims Regulation [EC] 1924/2006; and 2. Ref XI.12.c - …	On behalf of the REFIT Platform, thank you for submitting your suggestion on the efficiency, effectiveness or burden reduction of EU regulation or its implementation by Member States. The REFIT Platform has reviewed your suggestion and divided it into two parts: 1. Ref XI.11.b -Nutrient Profiles pursuant to art. 4 of the Nutrition and Health Claims Regulation [EC] 1924/2006; and 2. Ref XI.12.c - …	Evidence	1	Reduce	1	1	Procedural	EN	0.0455181	0.193858	0.0109783	0.185633	0.434043	0.0518499	0.0324602	0.0456593
e248	Y2016	2016-04-06	EU citizen	Citizen	France	French law on fitness instruction is too restrictive : They only allow french state registered diplomas, and a such foreign diplomas do not allow to work in the fitness industry. I am an example of an english university graduate in sports science (4years full study) and the french do not allow me to work because I don't have the french 1 year fitness diploma, it's crazy. Suggestion: Allow all eur…	French law on fitness instruction is too restrictive : They only allow french state registered diplomas, and a such foreign diplomas do not allow to work in the fitness industry. I am an example of an english university graduate in sports science (4years full study) and the french do not allow me to work because I don't have the french 1 year fitness diploma, it's crazy. Suggestion: Allow all eur…	We thank you for your submission made through the form Simplification - Online Consultation. Sports professions are subject to Article L212-1 of the “Code du sport” which prescribes that instructing physical activities or sports against remuneration requires the possession of a diploma or a certificate of qualification. Such a diploma can also be a foreign diploma recognised as equivalent. At the…	We thank you for your submission made through the form Simplification - Online Consultation. Sports professions are subject to Article L212-1 of the “Code du sport” which prescribes that instructing physical activities or sports against remuneration requires the possession of a diploma or a certificate of qualification. Such a diploma can also be a foreign diploma recognised as equivalent. At the…	Evidence	1	Harmonization	0	1	Policy substantive	EN	0.0132126	0.25893	0.0916856	0.0215557	0.0904792	0.468364	0.0237232	0.03205
e249	Y2016	2016-04-07	Business association	Business	Belgium	There are instances in EU legislation where the SME Test in official impact assessments fails because it is not adapted nor it measures impacts on self-employed professionals. These individuals (also referred to as one person SMEs) are the smallest of small businesses and with a 45% increase since 2004, they are the fastest growing segment of the EU labour market. According to the European defini…	There are instances in EU legislation where the SME Test in official impact assessments fails because it is not adapted nor it measures impacts on self-employed professionals. These individuals (also referred to as one person SMEs) are the smallest of small businesses and with a 45% increase since 2004, they are the fastest growing segment of the EU labour market. According to the European defini…	On behalf of the REFIT Platform, we would like to inform you that on 23 November the REFIT Platform has adopted an opinion on your suggestion regarding "SME test" (REFIT Platform ref. XII.17.a). The adopted Opinion has been published on the REFIT Platform's website (https://ec.europa.eu/info/law/law-making-process/overview-law-making-pro....) The follow-up to this adopted opinion will be publishe…	On behalf of the REFIT Platform, we would like to inform you that on 23 November the REFIT Platform has adopted an opinion on your suggestion regarding "SME test" (REFIT Platform ref. XII.17.a). The adopted Opinion has been published on the REFIT Platform's website (https://ec.europa.eu/info/law/law-making-process/overview-law-making-pro....) The follow-up to this adopted opinion will be publishe…	Evidence	1	Reduce	1	1	Adoption	EN	0.358143	0.0392538	0.00422208	0.330882	0.211752	0.0120854	0.0306385	0.0130227
e251	Y2016	2016-04-13	EU citizen	Citizen	Netherlands	I am against TTIP. It gives too much power to multinationals. It undermines our democracy. Governments can be forced to pay enormous amounts of money.	I am against TTIP. It gives too much power to multinationals. It undermines our democracy. Governments can be forced to pay enormous amounts of money.			Opinion	0	Reduce	1	0		EN	0.1638	0.273559	0.219732	0.0280075	0.0220074	0.0874592	0.0483013	0.157134
e252	Y2016	2016-04-13	EU citizen	Citizen	Germany	The European Commission is not qualified to decide about infringement of EU law. Here an example: https://archive.org/details/20141111BrusselsPetition12292013KZCompleteEN This has also been shown in the case of MaxSchrems (SafeHarbor) decided in favor of Mr Schrems whilst the EU Commission had completely failed to stop the so called safe harbor agreements. Already the EU Ombusdman O'Reilly has st…	The European Commission is not qualified to decide about infringement of EU law. Here an example: https://archive.org/details/20141111BrusselsPetition12292013KZCompleteEN This has also been shown in the case of MaxSchrems (SafeHarbor) decided in favor of Mr Schrems whilst the EU Commission had completely failed to stop the so called safe harbor agreements. Already the EU Ombusdman O'Reilly has st…	Many thanks for your email and your submission in the Lighten the load – have your say. Concerning your suggestions, please note that the European Commission does not decide on infringements of EU law. This is the competence of the Court of Justice of the European Union (CJEU). We would also like to clarify that while the judgments of the CJEU are legally binding, this is not the case with Commis…	Many thanks for your email and your submission in the Lighten the load – have your say. Concerning your suggestions, please note that the European Commission does not decide on infringements of EU law. This is the competence of the Court of Justice of the European Union (CJEU). We would also like to clarify that while the judgments of the CJEU are legally binding, this is not the case with Commis…	Opinion	0	Neutral	0	1	Competence	EN	0.00525779	0.00964003	0.0119063	0.00918646	0.00296624	0.922608	0.0126785	0.0257563
e253	Y2016	2016-04-14	EU citizen	Citizen	Germany	CAP needs urgently a Fitness Check, especially for their negative social (grow or move away) and negative/non-environmental effects. 50 Mrd. €/a should be investigated in supporting organic farming and environmental protection in EU and not to make land owner rich.	CAP needs urgently a Fitness Check, especially for their negative social (grow or move away) and negative/non-environmental effects. 50 Mrd. €/a should be investigated in supporting organic farming and environmental protection in EU and not to make land owner rich.			Opinion	0	Increase	0	0		EN	0.0153216	0.670735	0.0235449	0.0719454	0.0300522	0.0278475	0.0328828	0.127671
e254	Y2016	2016-04-14	EU citizen	Citizen	Germany	The European Commission is famous for idleness when it comes to member states breaking European law. Citizens have no protection, although this is exactly the job of some well paid lawyers in the Commission - and why are they English lawyers, if Britain gives a damn about the EU? Paid generously with our tax money, which makes them think that they are upper class! It is their duty to ensure Europ…	The European Commission is famous for idleness when it comes to member states breaking European law. Citizens have no protection, although this is exactly the job of some well paid lawyers in the Commission - and why are they English lawyers, if Britain gives a damn about the EU? Paid generously with our tax money, which makes them think that they are upper class! It is their duty to ensure Europ…			Opinion	0	Increase	0	0		EN	0.00631377	0.00997725	0.00679684	0.0080681	0.0142585	0.926037	0.00838609	0.0201627
e255	Y2016	2016-04-14	EU citizen	Citizen	Spain	Mi sugerencia va dirigida al sector del consumo. No entiendo como no está homogeneizada la legislación. Mi caso personal se refiere a la duración de los contratos en Alemania. En este país los consumidores somos esclavos como mínimo dos años de cualquier contrato. Me parece que no debería permitirse una duración tan larga pues contratar algo en Alemania se puede comparar casi como una condena, po…	My suggestion is directed to the consumer sector. I do not understand how the legislation is not homogenized. My personal case refers to the duration of contracts in Germany. In this country, consumers are slaves of at least two years of any contract. I think that such a long duration should not be allowed because hiring something in Germany can be compared almost as a sentence, because regardles…	Thank you for your submission in the lighten the load – have your say. Could you please provide us with some more details as to which legislation you are referring too, what were the administrative burden / costs you have endured and also which type of contracts are you referring too (employment)? Kind regards,	Thank you for your submission in the lighten the load – have your say. Could you please provide us with some more details as to which legislation you are referring too, what were the administrative burden / costs you have endured and also which type of contracts are you referring too (employment)? Kind regards,	Evidence	1	Harmonization	0	1	Policy substantive	ES	0.460219	0.0432052	0.0247023	0.0226744	0.01841	0.0837254	0.0454784	0.301585
e256	Y2016	2016-04-16	EU citizen	Citizen	Netherlands	‘’Unity in diversity’’ Thanks to the big thinkers of the idea of European Union. European Union has got his own law(s) in different fields of the European communities. There should be a complete EU-law that can answer all of the questions of the European citizens. From this point of view there is no need of national law(s). In this way there would be les bureaucracy and more savings and clear ser…	‘’Unity in diversity’’ Thanks to the big thinkers of the idea of European Union. European Union has got his own law(s) in different fields of the European communities. There should be a complete EU-law that can answer all of the questions of the European citizens. From this point of view there is no need of national law(s). In this way there would be les bureaucracy and more savings and clear ser…			Opinion	0	Harmonization	0	0		EN	0.0117555	0.0264143	0.0273928	0.0211795	0.00949748	0.484687	0.301194	0.117879
e257	Y2016	2016-04-19	Other	Citizen	Spain	Las directrices europeas siempre inciden en la necesaria simplificación burocrática en la gestión, evitando duplicidades, algo que entiendo muy adecuado y oportuno. Algunas veces son algunas autoridades estatales o regionales las que no contribuyen a simplificar la burocracia cuando desarrollan la normativa comunitaria, y algunas veces las propias autoridades estatales o regionales trasladan que …	The European guidelines always affect the necessary bureaucratic simplification in management, avoiding duplication, something that I understand as very appropriate and timely. Sometimes it is some state or regional authorities that do not contribute to simplifying bureaucracy when developing community regulations, and some Sometimes the state or regional authorities themselves transfer that it i…	Dear Sir/ Dear Madam, On behalf of the REFIT Platform, thank you for submitting your suggestion on the efficiency, effectiveness or burden reduction of EU regulation or its implementation by Member States. The Platform has worked on your submission and recommended action to the Commission. A formal opinion on the issues raised by your submission has, however not been adopted. These is because the…	Dear Sir/ Dear Madam, On behalf of the REFIT Platform, thank you for submitting your suggestion on the efficiency, effectiveness or burden reduction of EU regulation or its implementation by Member States. The Platform has worked on your submission and recommended action to the Commission. A formal opinion on the issues raised by your submission has, however not been adopted. These is because the…	Evidence	1	Reduce	1	1	Competence	ES	0.00360382	0.111671	0.00394455	0.00805585	0.0299761	0.0056034	0.828168	0.00897683
e260	Y2016	2016-04-26	EU citizen	Citizen	Greece	ΝΟΜΙΖΩ ΟΤΙ ΤΟ ΚΥΡΙΑΡΧΟ ΠΡΟΒΛΗΜΑ ΤΗΣ ΕΥΡΩΠΗΣ ΕΙΝΑΙ ΤΟ ΖΗΤΗΜΑ ΚΑΝΟΝΩΝ ΜΕΤΑΞΥ ΤΩΝ ΚΡΑΤΩΝ ΜΕΛΩΝ ΠΟΥ ΝΑ ΡΥΘΜΙΖΟΥΝ ΤΗΝ ΙΣΣΟΡΟΠΗ ΚΑΙ ΒΙΩΣΙΜΗ ΑΝΑΠΤΥΞΗ ΜΕ ΕΝΑ ΣΥΣΤΗΜΑ ΔΙΚΑΙΟΥ ΑΝΤΑΓΩΝΙΣΜΟΥ	I THINK EUROPE'S SUPERVISIVE PROBLEM IS THE ISSUE OF RULES BETWEEN MEMBER STATES TO REGULATE BALANCE AND SUSTAINABLE GROWTH AND GROWTH			Opinion	0	Reduce	1	0		GR	0.0324679	0.483751	0.0276575	0.0351996	0.0559011	0.252303	0.0466093	0.0661106
e261	Y2016	2016-04-28	EU citizen	Citizen	Ireland	Social Inclusion Ireland is dependent and represented by head of Social Protection Ireland in European Social inclusion affairs. This act is deceitful, and it is depriving social inclusion Ireland the authority needed to abide to the Union law, and from the funds allocated to social inclusion.	Social Inclusion Ireland is dependent and represented by head of Social Protection Ireland in European Social inclusion affairs. This act is deceitful, and it is depriving social inclusion Ireland the authority needed to abide to the Union law, and from the funds allocated to social inclusion.			Opinion	0	Reduce	1	0		EN	0.0226671	0.208458	0.0311046	0.0533557	0.0315687	0.104401	0.0405696	0.507875
e262	Y2016	2016-04-29	Company/business org	Business	Sweden	Felöversättning i den svenska versionen av General Data Protection Regulation samt felstavningar http://eur-lex.europa.eu/legal-content/SV/TXT/PDF/?uri=CONSIL:ST_5419_20... Artikel 28 stycke 10 sidan 157 I detta stycke har personuppgiftsansvarige och personuppgiftsbiträde förväxlats och hamnat i fel ordning. Om man jämför med den engelska versionen så framkommer det tydligt. "Om en personuppgifts…	"Error translation in the Swedish version of the General Data Protection Regulation and misspellings http: //eur-lex.europa.eu/legal-content/EN/TXT/PDF/?uri=CONSIL: ST_5419_20 ... Article 28, paragraph 10, page 157 In this paragraph, the person responsible for personal data and the personal data assistant have been confused and ended up in the wrong order. If you compare with the English version,…			Opinion	0	Neutral	0	0		SE	0.00548057	0.0453429	0.00523109	0.0181116	0.0336146	0.00783254	0.876594	0.00779317
e263	Y2016	2016-04-30	Company/business org	Business	Spain	Me preocupa que los autónomos y pequeños empresarios estemos asfixiados de impuestos y que las grandes fortunas paguen el 3% y lleven su dinero a Panamá. Me preocupa que estemos todos controlados a través de la tecnología pero las grandes fortunas sigan escapando a cualquier control hasta que han salido los casos de corrupción por los periodistas, no por policías ni Ministerios de Hacienda europe…	I am concerned that the self-employed and small businessmen are suffocated with taxes and that the great fortunes pay 3% and take their money to Panama. I worry that we are all controlled through technology but the great fortunes continue to escape any control until the cases of corruption by journalists have come up, not by police or European Finance Ministries. I am concerned that the human bei…			Opinion	0	Increase	0	0		ES	0.0187472	0.0618293	0.402853	0.016054	0.0103732	0.0473037	0.311549	0.131291
e264	Y2016	2016-05-02	EU citizen	Citizen	Sweden	Hello, The focus is now on the bioeconomy and circular economy. As a retired scientist, I want to pay attention to the biological processes that may contribute to more efficient use of bioenergy and simultaneously curb the negative impact on the environment, health and climate. Precondition for success is "knowledge-based decision making" that leads to wise decisions. Transparent presentation of …	Hello, The focus is now on the bioeconomy and circular economy. As a retired scientist, I want to pay attention to the biological processes that may contribute to more efficient use of bioenergy and simultaneously curb the negative impact on the environment, health and climate. Precondition for success is "knowledge-based decision making" that leads to wise decisions. Transparent presentation of …	The Commission services take good note of the provided suggestions, which also correspond to much of our thinking on the bioeconomy. The issues raised will continue to be addressed in European research & innovation policies, including the review and possible update of the European Bioeconomy Strategy and FOOD 2030 initiative. More information about our policies regarding the bioeconomy can be fou…	The Commission services take good note of the provided suggestions, which also correspond to much of our thinking on the bioeconomy. The issues raised will continue to be addressed in European research & innovation policies, including the review and possible update of the European Bioeconomy Strategy and FOOD 2030 initiative. More information about our policies regarding the bioeconomy can be fou…	Evidence	1	Increase	0	1	Procedural	EN	0.0104989	0.623138	0.0227926	0.0518296	0.0505343	0.0338207	0.127706	0.0796807
e265	Y2016	2016-05-04	Business association	Business	Belgium	AER supports the principle of helping consumers to make informed choices when purchasing a product or a service to which a credit is associated, objective put forward in Directive 2008/48/EC on credit agreements for consumers. However, as explained in the attached submission, the provisions set at article 4 of this text do not seem to permit attainment of such objective whilst they do hinder comm…	AER supports the principle of helping consumers to make informed choices when purchasing a product or a service to which a credit is associated, objective put forward in Directive 2008/48/EC on credit agreements for consumers. However, as explained in the attached submission, the provisions set at article 4 of this text do not seem to permit attainment of such objective whilst they do hinder comm…	4 October 2017. On behalf of the REFIT Platform, we would like to inform you that on 21 September 2017 the REFIT Platform has adopted an opinion on your suggestion regarding the Directive on Credit Agreements for Consumers (REFIT Platform ref.VI.4.b). The adopted Opinion has been published on the REFIT Platform's website . The follow-up to this adopted opinion will be made in the context of the p…	4 October 2017. On behalf of the REFIT Platform, we would like to inform you that on 21 September 2017 the REFIT Platform has adopted an opinion on your suggestion regarding the Directive on Credit Agreements for Consumers (REFIT Platform ref.VI.4.b). The adopted Opinion has been published on the REFIT Platform's website . The follow-up to this adopted opinion will be made in the context of the p…	Evidence	1	Reduce	1	1	Adoption	EN	0.653362	0.0409684	0.00450419	0.103463	0.163834	0.00887521	0.0112017	0.013791
e266	Y2016	2016-05-06	EU citizen	Citizen	United Kingdom	The lack of backbone shown by the EU framework in relation to the control of the motor industry and the accountability of said industry in employing double standards where by EU citizens are discriminated against by the European motor industry in relation to the USA. Volkswagen has shown total contempt to the citizens of the EU by stating that they will not compensate EU citizens the same as US c…	The lack of backbone shown by the EU framework in relation to the control of the motor industry and the accountability of said industry in employing double standards where by EU citizens are discriminated against by the European motor industry in relation to the USA. Volkswagen has shown total contempt to the citizens of the EU by stating that they will not compensate EU citizens the same as US c…	On behalf of the REFIT Platform, thank you for submitting your suggestion on the efficiency, effectiveness or burden reduction of EU regulation or its implementation by Member States. Your suggestion concerns a policy area that has not been prioritised for the work of the Platform in the coming months. The REFIT Platform aims to cover all policy areas over time and your suggestion will be conside…	On behalf of the REFIT Platform, thank you for submitting your suggestion on the efficiency, effectiveness or burden reduction of EU regulation or its implementation by Member States. Your suggestion concerns a policy area that has not been prioritised for the work of the Platform in the coming months. The REFIT Platform aims to cover all policy areas over time and your suggestion will be conside…	Evidence	1	Increase	0	1	Procedural	EN	0.0971797	0.232098	0.195873	0.0149227	0.0373038	0.276191	0.0965211	0.0499103
e267	Y2016	2016-05-07	EU citizen	Citizen	Italy	Hi, I'm Italian but I'll try write in English. I would like to give you a suggestione regarding the Digital Single Market. You did a good job with the roaming regulations, but you left uncovered all the International calls people do on a daily basis across the EU. If I live in Italy and I want to call a number in nearby France, why do I have to pay an extra fee? In many cases those rates are supe…	Hi, I'm Italian but I'll try write in English. I would like to give you a suggestione regarding the Digital Single Market. You did a good job with the roaming regulations, but you left uncovered all the International calls people do on a daily basis across the EU. If I live in Italy and I want to call a number in nearby France, why do I have to pay an extra fee? In many cases those rates are supe…	On behalf of the REFIT Platform, thank you for submitting your suggestion on the efficiency, effectiveness or burden reduction of EU regulation or its implementation by Member States. The Platform has concluded that it does not intend to prepare an opinion on the issues raised. This is because the issues are currently being examined by the European Parliament and Council on a proposal from the Co…	On behalf of the REFIT Platform, thank you for submitting your suggestion on the efficiency, effectiveness or burden reduction of EU regulation or its implementation by Member States. The Platform has concluded that it does not intend to prepare an opinion on the issues raised. This is because the issues are currently being examined by the European Parliament and Council on a proposal from the Co…	Opinion	0	Harmonization	0	1	Procedural	EN	0.195308	0.0334909	0.386079	0.0431757	0.0118437	0.0436577	0.045018	0.241426
e268	Y2016	2016-05-09	Business association	Business	Belgium	Since 2010, with the Regulation 757/2010 EC the PFOS have been included in Annex I to the Regulation (EC) No. 850/2004 on persistent organic pollutants (POP Regulation). It bans the placing on the market of articles, in which the concentration of PFOS is higher than 0.1 % by weight calculated with reference to the mass of structurally or micro-structurally distinct parts that contain PFOS or, for…	Since 2010, with the Regulation 757/2010 EC the PFOS have been included in Annex I to the Regulation (EC) No. 850/2004 on persistent organic pollutants (POP Regulation). It bans the placing on the market of articles, in which the concentration of PFOS is higher than 0.1 % by weight calculated with reference to the mass of structurally or micro-structurally distinct parts that contain PFOS or, for…	On behalf of the REFIT Platform, thank you for submitting your suggestion on the efficiency, effectiveness or burden reduction of EU regulation or its implementation by Member States. The REFIT Platform has reviewed your suggestion and concluded that it will presently not prepare an opinion on the issues raised. This is because your proposal is currently subject to ongoing work of the Commission …	On behalf of the REFIT Platform, thank you for submitting your suggestion on the efficiency, effectiveness or burden reduction of EU regulation or its implementation by Member States. The REFIT Platform has reviewed your suggestion and concluded that it will presently not prepare an opinion on the issues raised. This is because your proposal is currently subject to ongoing work of the Commission …	Evidence	1	Increase	0	1	Procedural	EN	0.109233	0.159623	0.006661	0.602594	0.0926476	0.00852145	0.0122184	0.00850198
e269	Y2016	2016-05-11	Business association	Business	Netherlands	http://cheapcollegecustomessaywritingserviceshelp.top/college-admission-... - college admission essay writing medical Hour Estimation: 1991 Euro Estimation: 1992	http://cheapcollegecustomessaywritingserviceshelp.top/college-admission-... - college admission essay writing medical Hour Estimation: 1991 Euro Estimation: 1992	Thank you for your message to the website 'Lighten the Load – Have your say'. This website is dedicated to collect views on how to make EU laws more effective and efficient to identify actions for simplification and reduction of regulatory burden. To find out how Europe and its institutions are working, we recommend you contact the Commission's Europe Direct Service, which has been designed to an…	Thank you for your message to the website 'Lighten the Load – Have your say'. This website is dedicated to collect views on how to make EU laws more effective and efficient to identify actions for simplification and reduction of regulatory burden. To find out how Europe and its institutions are working, we recommend you contact the Commission's Europe Direct Service, which has been designed to an…	Opinion	0	Neutral	0	1	Competence	EN	0.0140006	0.0431064	0.806651	0.0197245	0.0074783	0.0385172	0.0291406	0.0413812
e270	Y2016	2016-05-12	EU citizen	Citizen	Canada	Je suis né en France et je vis au Canada. Je suis citoyen canadien. Ma maman vivait en France. Elle est décédée en septembre 2012. J'ai reçu en juin 2014 une lettre de la Direction Générale des Finances Publiques m'indiquant que, en la qualité d'héritier de ma maman, j'avais l'obligation de régler ses dettes. Cette lettre était accompagnée d'un bordereau de situation indiquant la somme dû. J'ai e…	“I was born in France and I live in Canada. I am a Canadian citizen. My mom lived in France. She died in September 2012. In June 2014, I received a letter from the Directorate General of Public Finances telling me that, as my mother's heir, I had the obligation to settle her debts. This letter was accompanied by a situation slip indicating the amount owed. I made the full payment requested in Jul…	Thank you for your message. On the basis of the information you provided, it is difficult to ascertain the actual circumstances of the payment, notably whether the payment was made from a bank account located outside the Union, for instance in Canada, or from a bank established in the Union. If the payment was indeed made from an account abroad, one should underline that there is today no Europea…	Thank you for your message. On the basis of the information you provided, it is difficult to ascertain the actual circumstances of the payment, notably whether the payment was made from a bank account located outside the Union, for instance in Canada, or from a bank established in the Union. If the payment was indeed made from an account abroad, one should underline that there is today no Europea…	Evidence	1	Increase	0	1	Policy substantive	FR	0.0259427	0.0503579	0.051689	0.0333173	0.0157575	0.652131	0.0552643	0.115541
e271	Y2016	2016-05-15	EU citizen	Citizen	Ireland	as a christian male i am horrified that Germany is calling Islam and there blood god to stampeid across the eu how is it that mercal thinks that we wil take it? we need an eu wide vote on this matter or it will led to war . any time we send you emails on this matter we are ignored , so as a citzen of the eu i demand a response from you or we will renounce our citizenship to islamic eu	as a christian male i am horrified that Germany is calling Islam and there blood god to stampeid across the eu how is it that mercal thinks that we wil take it? we need an eu wide vote on this matter or it will led to war . any time we send you emails on this matter we are ignored , so as a citzen of the eu i demand a response from you or we will renounce our citizenship to islamic eu			Opinion	0	Increase	0	0		EN	0.0135351	0.0153574	0.0152478	0.0431816	0.00884108	0.4617	0.407173	0.034964
e273	Y2016	2016-05-19	EU citizen	Citizen	Portugal	Increase jobs in Portugal creating means for the companies not to "run away" to other European countries where the minimum wage is low in comparison with the average wages in Europe. What's the solution or one possible solution to be combined with others? The answer is.... European minimum wage supported by the European central bank during the first 5 years.	Increase jobs in Portugal creating means for the companies not to "run away" to other European countries where the minimum wage is low in comparison with the average wages in Europe. What's the solution or one possible solution to be combined with others? The answer is.... European minimum wage supported by the European central bank during the first 5 years.			Opinion	0	Increase	0	0		EN	0.0239371	0.0189267	0.111778	0.0158669	0.00913766	0.341064	0.441665	0.037624
e275	Y2016	2016-05-24	EU citizen	Citizen	Spain	Greetings, I have studied Political Science and I considered that EU institutions may be interested in son institutional reforms related to the core european institutions. Hope you find it interesting. Kind regards.	Greetings, I have studied Political Science and I considered that EU institutions may be interested in son institutional reforms related to the core european institutions. Hope you find it interesting. Kind regards.			Opinion	0	Increase	0	0		EN	0.0175819	0.118643	0.589032	0.0802695	0.0197142	0.0912957	0.0370569	0.0464063
e276	Y2016	2016-05-27	EU citizen	Citizen	United Kingdom	We do not elect you. Yet you override our national laws, take our money, and ignore our legitimate concerns, laughing at us because we value our national sovereignty. Why should we trust you or stay in your organisation?	We do not elect you. Yet you override our national laws, take our money, and ignore our legitimate concerns, laughing at us because we value our national sovereignty. Why should we trust you or stay in your organisation?			Opinion	0	Reduce	1	0		EN	0.0200305	0.0402888	0.0302689	0.0222368	0.0142003	0.0502536	0.0562784	0.766443
e277	Y2016	2016-05-27	Business association	Business	United Kingdom	We would like to set out our views relating to the impact of Article 4 of Directive 2008/48/EC on credit agreements for consumers (the Consumer Credit Directive) on consumers, advertisers and the media in the United Kingdom. The attached paper sets out our views, covering in summary: - The objective of the Consumer Credit Directive is to ensure consumer confidence through providing information in…	We would like to set out our views relating to the impact of Article 4 of Directive 2008/48/EC on credit agreements for consumers (the Consumer Credit Directive) on consumers, advertisers and the media in the United Kingdom. The attached paper sets out our views, covering in summary: - The objective of the Consumer Credit Directive is to ensure consumer confidence through providing information in…	On behalf of the REFIT Platform, we would like to inform you that on 21 September 2017 the REFIT Platform has adopted an opinion on your suggestion regarding the Directive on Credit Agreements for Consumers (REFIT Platform ref.VI.4.c). The adopted Opinion is attached to this e-mail and has also been published on the REFIT Platform's website . The follow-up to this adopted opinion will be made in …	On behalf of the REFIT Platform, we would like to inform you that on 21 September 2017 the REFIT Platform has adopted an opinion on your suggestion regarding the Directive on Credit Agreements for Consumers (REFIT Platform ref.VI.4.c). The adopted Opinion is attached to this e-mail and has also been published on the REFIT Platform's website . The follow-up to this adopted opinion will be made in …	Evidence	1	Reduce	1	1	Adoption	EN	0.652025	0.265917	0.00559771	0.026795	0.0244623	0.00596564	0.007601	0.0116366
e278	Y2016	2016-05-29	EU citizen	Citizen	Germany	Dear Comission, Is there any laws in the planning stage that will restrict the use of packaging to a minimum necessary and fine overpackaging? This kind of law is necessary now and will be even more necessary for the future. It will help to educate the market to a more responsable use of resourced and will reduce general trash impact in europe. Me as a consumer, I feel forced by the industry and …	Dear Comission, Is there any laws in the planning stage that will restrict the use of packaging to a minimum necessary and fine overpackaging? This kind of law is necessary now and will be even more necessary for the future. It will help to educate the market to a more responsable use of resourced and will reduce general trash impact in europe. Me as a consumer, I feel forced by the industry and …			Opinion	0	Increase	0	0		EN	0.0378021	0.178555	0.0446191	0.0179208	0.187826	0.183012	0.177912	0.172352
e279	Y2016	2016-05-30	EU citizen	Citizen	Ireland	Re: Refugee Crisis, My concern is that the EU is on a path to destruction and this crisis is getting out of hand. Here are some measures I propose: 1) The EU needs to communicate more with it's citizens on what proposals are being implemented to combat this crisis. Right now we are mostly getting views presented by bias media that want the EU to fail or just scare people. 2) This is the most obvi…	Re: Refugee Crisis, My concern is that the EU is on a path to destruction and this crisis is getting out of hand. Here are some measures I propose: 1) The EU needs to communicate more with it's citizens on what proposals are being implemented to combat this crisis. Right now we are mostly getting views presented by bias media that want the EU to fail or just scare people. 2) This is the most obvi…			Opinion	0	Increase	0	0		EN	0.00799159	0.078241	0.222756	0.0202156	0.00612011	0.268328	0.0771154	0.319232
e280	Y2016	2016-05-30	EU citizen	Citizen	Hungary	I advice to use scandinavian principle of decision-making: if there are no alternative opinions, then the proposal automatically becomes to decision. For example, Constitution of the Republic of Iceland, Article 5: "The candidate, if there is more than one, who receives the most votes is duly elected President. If there is only one candidate, he is duly elected without a vote." http://www.governm…	I advice to use scandinavian principle of decision-making: if there are no alternative opinions, then the proposal automatically becomes to decision. For example, Constitution of the Republic of Iceland, Article 5: "The candidate, if there is more than one, who receives the most votes is duly elected President. If there is only one candidate, he is duly elected without a vote." http://www.governm…			Opinion	0	Increase	0	0		EN	0.0228839	0.0451133	0.0217001	0.138428	0.0602537	0.14016	0.127838	0.443623
e281	Y2016	2016-06-03	EU citizen	Citizen	Poland	Hello, In 2009 the European Union adopted a new regulation on the protecting animals at the time of killing (Council regulation 1099/2009) unfortunately not including animals killed as part of experiments, hunting cultural or sporting events, euthanasia by a veterinarian, and poultry or rabbits killed for personal consumption. Existing laws allow too much freedom for criminals to abuse their righ…	Hello, In 2009 the European Union adopted a new regulation on the protecting animals at the time of killing (Council regulation 1099/2009) unfortunately not including animals killed as part of experiments, hunting cultural or sporting events, euthanasia by a veterinarian, and poultry or rabbits killed for personal consumption. Existing laws allow too much freedom for criminals to abuse their righ…			Opinion	0	Increase	0	0		EN	0.015865	0.106377	0.35377	0.092884	0.132921	0.0545495	0.220641	0.0229926
e282	Y2016	2016-06-06	EU citizen	Citizen	Finland	Joka viikko Suomesta, kuten muistakin EU-maista, lähetetään Brysseliin lukuisia virkamiehiä ja asiantuntijoita osallistumaan lukuisiin eri EU:n kokouksiin. Joskus komissio maksaa matkat ja joskus taas kansalliset virastot huolehtivat kuluista itsenäisesti. Lentomatkojen lisäksi kuluja tulee hotelliyöpymisistä sekä päivärahoista. Yhden henkilön yhden yön kestävä kokousmatka Suomesta Brysseliin mak…	Every week, from Finland, as well as from other EU countries, numerous officials and experts are sent to Brussels to take part in many different EU meetings. A sustainable conference trip from Finland to Brussels costs on average about 1,100 euros. Participants in meetings would no longer need to physically travel to meeting places when it would be possible to participate via a secure video conne…			Opinion	0	Increase	0	0		FI	0.00428773	0.00827313	0.00596898	0.00905543	0.00480078	0.0273258	0.926467	0.013821
e283	Y2016	2016-06-07	Other	Citizen	France	Nature 2000 n'est que la couverture d'un livre dont l'histoire n'est que la mort des agriculteurs ! Comme obliger les Agriculteurs à faire une mise aux normes et leur bloquer leur économie, d'un côté vous avez les directives européennes qui contrairement est dit conserve et protège la flore et la faune, en France l'état à choisi élaborer un Docob, nous pouvons y lire des opérations et qui sont co…	Nature 2000 is only the cover of a book whose story is only the death of farmers! Like forcing Farmers to bring them up to standard and block their economy, on the one hand you have European directives which, on the contrary, is said to conserve and protect flora and fauna, in France the state has chosen to develop a Docob, we can read operations and which are contradictory, for example, increasi…			Opinion	0	Reduce	1	0		FR	0.0736514	0.415734	0.0386113	0.0128968	0.0141121	0.382278	0.0170449	0.0456715
e284	Y2016	2016-06-10	EU citizen	Citizen	Italy	La Commissione Juncker è mendace e scorretta nei confronti dei cittadini Europei. Falsifica dati, distorce le problematiche per conseguire i propri fini antidemocratici. La proposta di variante alla direttiva sulle armi 477/91 è l'esempio più eclatante. Si è data voce alle organizzazioni pacifiste ed anti armi senza ascoltare milioni di cittadini, ossequenti delle leggi, che usano le armi per fin…	The Juncker Commission is mendacious and unfair towards European citizens. It falsifies data, distorts issues to achieve its own undemocratic ends. The proposed variant to the Weapons Directive 477/91 is the most striking example. A voice has been given to pacifist and anti-gun organizations without listening to millions of citizens, obedient to the laws, who use weapons for legitimate purposes. …			Opinion	0	Reduce	1	0		FR	0.0185907	0.200633	0.12735	0.0299415	0.0145257	0.479676	0.0770886	0.0521937
e286	Y2016	2016-06-15	EU citizen	Citizen	United Kingdom	I am writing to protest about EU allowing exhibition about so called Cardinal Stepinac, who was responsible for running concentration camp Jasenovac during the World War II. Until now I was going to vote for Britain to stay in the EU but if Stepinac represents EU values than I am voting out. Shame.	I am writing to protest about EU allowing exhibition about so called Cardinal Stepinac, who was responsible for running concentration camp Jasenovac during the World War II. Until now I was going to vote for Britain to stay in the EU but if Stepinac represents EU values than I am voting out. Shame.			Opinion	0	Neutral	0	0		EN	0.0138876	0.0181547	0.0156906	0.0103359	0.00737891	0.0389684	0.020283	0.875301
e287	Y2016	2016-06-17	Other	Citizen	United Kingdom	The impact of Article 4 of Directive 2008/48/EC 2 on credit agreements for consumers (the Consumer Credit Directive) from the advertiser perspective in the United Kingdom.	The impact of Article 4 of Directive 2008/48/EC 2 on credit agreements for consumers (the Consumer Credit Directive) from the advertiser perspective in the United Kingdom.	On behalf of the REFIT Platform, thank you for submitting your suggestion on the efficiency, effectiveness or burden reduction of EU regulation or its implementation by Member States. It is planned that work will start within the next 6 months on the issues raised by your suggestion with a view to the possibility that the Platform will adopt an Opinion in due course. Regularly updated information…	On behalf of the REFIT Platform, thank you for submitting your suggestion on the efficiency, effectiveness or burden reduction of EU regulation or its implementation by Member States. It is planned that work will start within the next 6 months on the issues raised by your suggestion with a view to the possibility that the Platform will adopt an Opinion in due course. Regularly updated information…	Evidence	1	Reduce	1	1	Procedural	EN	0.73581	0.0934923	0.0121634	0.0295904	0.0569264	0.0185622	0.0174901	0.0359652
e289	Y2016	2016-06-21	Business association	Business	Belgium	While the packaging of most chewing gum products was already too small to accommodate the mandatory labelling requirements in a sufficient number of languages, all sugar free chewing gum products are now required to display a nutrition declaration and to respect the mandatory font size. This is because the exemption from nutrition declaration granted to chewing gum products in Annex V of Regulati…	While the packaging of most chewing gum products was already too small to accommodate the mandatory labelling requirements in a sufficient number of languages, all sugar free chewing gum products are now required to display a nutrition declaration and to respect the mandatory font size. This is because the exemption from nutrition declaration granted to chewing gum products in Annex V of Regulati…	On behalf of the REFIT Platform, thank you for submitting your suggestion on the efficiency, effectiveness or burden reduction of EU regulation or its implementation by Member States. The Platform has concluded that it does not intend to prepare an opinion on the issues raised. This is because the issues are covered by an EU legislative measure which only entered into application less than two ye…	On behalf of the REFIT Platform, thank you for submitting your suggestion on the efficiency, effectiveness or burden reduction of EU regulation or its implementation by Member States. The Platform has concluded that it does not intend to prepare an opinion on the issues raised. This is because the issues are covered by an EU legislative measure which only entered into application less than two ye…	Evidence	1	Increase	0	1	Procedural	EN	0.0032553	0.0121406	0.000556341	0.00613981	0.970891	0.00166833	0.00320904	0.00213932
e292	Y2016	2016-06-25	EU citizen	Citizen	France	Brexit and the need for swift action. The British referendum has delivered a result that we regret but must respect. It is urgent that the Commission moves very swiftly to define a concrete position for future relations with the UK. This should be neither punitive nor privileged. Collective punishment of a nation where more than 48% want to stay within the EU would be unreasonable. A continued pr…	Brexit and the need for swift action. The British referendum has delivered a result that we regret but must respect. It is urgent that the Commission moves very swiftly to define a concrete position for future relations with the UK. This should be neither punitive nor privileged. Collective punishment of a nation where more than 48% want to stay within the EU would be unreasonable. A continued pr…			Opinion	0	Increase	0	0		EN	0.00811095	0.0777168	0.0120611	0.0110271	0.00698855	0.0307501	0.0373249	0.81602
e293	Y2016	2016-06-27	EU citizen	Citizen	Hungary	I think that the President of European Commission should personally spend more time on the road visiting local communities all over EU member states. If it would depend on me, I would select regions from each country representing in total 10%-25% in inhabitants of respective country, and during a presidential "life time" I would visit each of these regions. I would make contact with the local aut…	I think that the President of European Commission should personally spend more time on the road visiting local communities all over EU member states. If it would depend on me, I would select regions from each country representing in total 10%-25% in inhabitants of respective country, and during a presidential "life time" I would visit each of these regions. I would make contact with the local aut…			Opinion	0	Increase	0	0		EN	0.0121228	0.0153174	0.0150735	0.0124641	0.00618316	0.301027	0.428812	0.209
e294	Y2016	2016-06-28	EU citizen	Citizen	Ireland	Freedom of movement As you can se am from the UK I like most of the people from the north of ireland voted to stay in the EU could you please tell me what am I going to do. Am happy with us in the EU and so is my Family if the English people want to leave why should the people from the north have to leave, as we voted to stay in. We are gutted with this vote to leave the EU	Freedom of movement As you can se am from the UK I like most of the people from the north of ireland voted to stay in the EU could you please tell me what am I going to do. Am happy with us in the EU and so is my Family if the English people want to leave why should the people from the north have to leave, as we voted to stay in. We are gutted with this vote to leave the EU			Opinion	0	Neutral	0	0		EN	0.00905004	0.0170058	0.049236	0.00708195	0.00373851	0.0734726	0.0173227	0.823092
e295	Y2016	2016-06-28	EU citizen	Citizen	United Kingdom	Do not want to come out of Europe - live in Totnes Devon UK - in our small settlement of High Beara we have Doctors, Admirals, Magistrates Teachers and not one person wants to leave the EU. The vote was not decisive, just the floods in London, on the day of the vote which closed polling stations, could have made the difference. 1 and a bit % is not the British people speaking! What can we do any …	Do not want to come out of Europe - live in Totnes Devon UK - in our small settlement of High Beara we have Doctors, Admirals, Magistrates Teachers and not one person wants to leave the EU. The vote was not decisive, just the floods in London, on the day of the vote which closed polling stations, could have made the difference. 1 and a bit % is not the British people speaking! What can we do any …			Opinion	0	Neutral	0	0		EN	0.0124177	0.0163605	0.111207	0.00826927	0.00372753	0.0371194	0.0209732	0.789926
e296	Y2016	2016-06-29	EU citizen	Citizen	Spain	Is this information true? I have received an email wiht the following information, It is not true, UE should be clarify Asunto: ESCÁNDALO: jubilación a los 50. los “sátrapas” de Bruselas han aprobado, para sí mismos, la jubilación a los 50. ¡Viva la Europa de los ladrones! - La jubilación a los 50 para los funcionarios de la Unión Económica Europea ha sido aprobada con pensiones mensuales de 9.00…	Is this information true? I have received an email wiht the following information, It is not true, UE should be clarify Subject: SCANDAL: retirement at 50. The “satraps” of Brussels have approved, for themselves, retirement at 50. Long live the Europe of thieves! - Retirement at 50 for officials of the European Economic Union has been approved with monthly pensions of € 9,000. It is normal that t…			Opinion	0	Neutral	0	0		ES	0.0105845	0.0120306	0.0626597	0.00711626	0.00414208	0.350412	0.0154654	0.537589
e297	Y2016	2016-06-30	EU citizen	Citizen	France	Hello, I work at ONERA(french aerospace lab) in the CEPRA19 wind tunnel. This facility, built around year 1973, belongs to the DGA (Direction Générale de l'Armenent) and it is exploited only by ONERA since 2000 January. This wind tunnel performs aeroacoustic tests mainly for European companies like AIRBUS, SAFRAN Aerocraft engines, ROLLS-ROYCE Deutschland, and some time for non European companies…	Hello, I work at ONERA(french aerospace lab) in the CEPRA19 wind tunnel. This facility, built around year 1973, belongs to the DGA (Direction Générale de l'Armenent) and it is exploited only by ONERA since 2000 January. This wind tunnel performs aeroacoustic tests mainly for European companies like AIRBUS, SAFRAN Aerocraft engines, ROLLS-ROYCE Deutschland, and some time for non European companies…			Opinion	0	Harmonization	0	0		EN	0.0203871	0.433862	0.0258977	0.0694965	0.021435	0.0983892	0.131948	0.198585
e298	Y2016	2016-06-30	EU citizen	Citizen	United Kingdom	I am one of the 48% in UK who strongly believe in the EU. I wish the urge the EU not to endanger weakening the Union by pursuing any form of negotiation with the UK which allows trade benefits without accepting all the other principles of EU membership. I and many others believe the EU to be the most important institution in the world for progress and as an example of how countries should co-oper…	I am one of the 48% in UK who strongly believe in the EU. I wish the urge the EU not to endanger weakening the Union by pursuing any form of negotiation with the UK which allows trade benefits without accepting all the other principles of EU membership. I and many others believe the EU to be the most important institution in the world for progress and as an example of how countries should co-oper…			Opinion	0	Neutral	0	0		EN	0.0116941	0.0917772	0.0313205	0.0149344	0.00998672	0.661697	0.0254399	0.15315
e299	Y2016	2016-07-01	EU citizen	Citizen	United Kingdom	Allow individual nations to control migration, to avoid straining public services, and prevent the rise of extremism	Allow individual nations to control migration, to avoid straining public services, and prevent the rise of extremism			Opinion	0	Increase	0	0		EN	0.017128	0.0382152	0.0249225	0.0393338	0.0222889	0.391593	0.415519	0.0509989
e300	Y2016	2016-07-01	EU citizen	Citizen	Finland	I contact you as a citizen because I'm concerned with Europe, which is an idea I strongly believe in. I think you need to make fast and concrete decisions that improve peoples feeling for Europe. A couple of concrete suggestions: Stop moving between Brussels and Strasbourg, it seems very childish and expensive. Stop making too detailed laws, that interfere with small things, it makes EU look ridi…	I contact you as a citizen because I'm concerned with Europe, which is an idea I strongly believe in. I think you need to make fast and concrete decisions that improve peoples feeling for Europe. A couple of concrete suggestions: Stop moving between Brussels and Strasbourg, it seems very childish and expensive. Stop making too detailed laws, that interfere with small things, it makes EU look ridi…			Opinion	0	Reduce	1	0		EN	0.00719697	0.00716913	0.0119154	0.0151274	0.00355218	0.0193789	0.0158907	0.919769
e301	Y2016	2016-07-02	Company/business org	Business	Spain	Hola señores,somos una Familia desesperadas y necesitamos Ayuda, se estan Violando nuestros Deechos Humanos,Descriminacion Social y un largo etc,necesitamos ayuda, Buenos días yo Miguel Mérida Gómez con D.N.I-78961664L, quisiera hablar con usted, para explicarle mi situación Familiar que estamos atravesando, es como un pozo sin fondo donde hemos caído y no podemos salir y nadie nos echa una cuerd…	Hello gentlemen, we are a desperate Family and we need Help, our Human Rights, Social Discrimination and much more are being violated, we need help,			Opinion	0	Increase	0	0		ES	0.0121981	0.0297827	0.708623	0.0147485	0.00534666	0.0459929	0.0297041	0.153605
e302	Y2016	2016-07-03	EU citizen	Citizen	Ireland	It is apparent to me that the Brexit issue is of real concern and people want to make an example of what happens when you back out of a Union of nations that all look to help one another. My perspective on the matter is of someone that won't really be affected by the outcome at all, however I care for the British people and the greater European people. The issue with the UK is apparently one of n…	It is apparent to me that the Brexit issue is of real concern and people want to make an example of what happens when you back out of a Union of nations that all look to help one another. My perspective on the matter is of someone that won't really be affected by the outcome at all, however I care for the British people and the greater European people. The issue with the UK is apparently one of n…			Opinion	0	Increase	0	0		EN	0.00661994	0.0127252	0.00754347	0.00731972	0.0141543	0.281653	0.010698	0.659286
e303	Y2016	2016-07-04	EU citizen	Citizen	United Kingdom	The EU mortgage credit directive (2014/17/EU) should be widened to cover commercial property and enable commercial debt advisory firms to operate on a cross-border basis. This will (i) widen access to credit for SMEs (ii) ensure they can obtain sophisticated advice when negotiating with lenders and (iii) allow SMEs to obtain credit on the best possible terms. Suggestion: The EU mortgage credit di…	The EU mortgage credit directive (2014/17/EU) should be widened to cover commercial property and enable commercial debt advisory firms to operate on a cross-border basis. This will (i) widen access to credit for SMEs (ii) ensure they can obtain sophisticated advice when negotiating with lenders and (iii) allow SMEs to obtain credit on the best possible terms. Suggestion: The EU mortgage credit di…	On behalf of the REFIT Platform, thank you for submitting your suggestion on the efficiency, effectiveness or burden reduction of EU regulation or its implementation by Member States. The Platform has concluded that it does not intend to prepare an opinion on the issues raised. This is because the issues are covered by an EU legislative measure which only entered into application less than two ye…	On behalf of the REFIT Platform, thank you for submitting your suggestion on the efficiency, effectiveness or burden reduction of EU regulation or its implementation by Member States. The Platform has concluded that it does not intend to prepare an opinion on the issues raised. This is because the issues are covered by an EU legislative measure which only entered into application less than two ye…	Evidence	1	Harmonization	0	1	Procedural	EN	0.00487594	0.00715616	0.187505	0.00382667	0.00143598	0.0165006	0.0124115	0.766288
e305	Y2016	2016-07-06	EU citizen	Citizen	Denmark	New EU, To The European Kommission, The New EU: Listen to the opinion of the citizens of the European nations: 1. Let each nation decide their own immigration policy. 2. Let each nation decide the volume and limits of the free movement of labour. 3. Give England access to the common marked as it benefits whole Europe and the stability of the global economy. 4. Focus more on environment of the wor…	New EU, To The European Kommission, The New EU: Listen to the opinion of the citizens of the European nations: 1. Let each nation decide their own immigration policy. 2. Let each nation decide the volume and limits of the free movement of labour. 3. Give England access to the common marked as it benefits whole Europe and the stability of the global economy. 4. Focus more on environment of the wor…			Opinion	0	Increase	0	0		EN	0.00914867	0.135547	0.0144389	0.0134059	0.010167	0.781499	0.013531	0.0222625
e306	Y2016	2016-07-08	Business association	Business	Belgium	Television and radio sales houses believe that empowering consumers with appropriate information when seeking credits is a commendable political objective which deserves a proper policy response. However, as a trade body representing advertising professionals, egta wishes to highlight that the current provisions of the Consumer Credit Directive 2008/48/EC show a lack of understanding of the media…	Television and radio sales houses believe that empowering consumers with appropriate information when seeking credits is a commendable political objective which deserves a proper policy response. However, as a trade body representing advertising professionals, egta wishes to highlight that the current provisions of the Consumer Credit Directive 2008/48/EC show a lack of understanding of the media…	4 October 2017. On behalf of the REFIT Platform, we would like to inform you that on 21 September 2017 the REFIT Platform has adopted an opinion on your suggestion regarding the Directive on Credit Agreements for Consumers (REFIT Platform ref.VI.4.d). The adopted Opinion has been published on the REFIT Platform's website . The follow-up to this adopted opinion will be made in the context of the p…	4 October 2017. On behalf of the REFIT Platform, we would like to inform you that on 21 September 2017 the REFIT Platform has adopted an opinion on your suggestion regarding the Directive on Credit Agreements for Consumers (REFIT Platform ref.VI.4.d). The adopted Opinion has been published on the REFIT Platform's website . The follow-up to this adopted opinion will be made in the context of the p…	Evidence	1	Reduce	1	1	Adoption	EN	0.451781	0.0601433	0.0253777	0.0333549	0.0239477	0.279669	0.0377119	0.0880143
e307	Y2016	2016-07-15	EU citizen	Citizen	Netherlands	Freedom of religion is a valuable asset, but only then when it recognizes the authority of the state and it's law	Freedom of religion is a valuable asset, but only then when it recognizes the authority of the state and it's law			Opinion	0	Neutral	0	0		EN	0.0157204	0.0288262	0.0292344	0.0224984	0.00960213	0.80991	0.0380238	0.0461851
e308	Y2016	2016-07-31	Other	Citizen	France	Les directives Européennes sont incohérente avec les directives imposées en France et vice versa A quand une législation cohérente, est-ce une volonté de l'Europe ou pas Suite à un contrôle nous pouvons soit avoir une amende ou une perte partielle ou totale de la PAC, Que pensez-vous faire ? et surtout Quand ? Comment travailler la terre avec les interdictions dues à Natura 2000, comment nourrir …	The European directives are inconsistent with the directives imposed in France and vice versa When will coherent legislation be a will of Europe or not? Following a check we can either have a fine or a partial or total loss of the cap, what do you do? and especially When? How to work the land with the prohibitions due to Natura 2000, how to feed our family with these financial losses? How does Eu…	Chère Madame, cher Monsieur, Merci pour votre message pour lequel j'ai le plaisir de vous communiquer ce qui suit. La Commission a un niveau diffèrent d'implication dans les procédures de désignation des deux types de sites qui interviennent dans le réseau Natura 2000 (les zones de protection spéciale – ZPS désignées au titre de la directive Oiseaux de 1979 et les Zones spéciale de conservation –…	Dear Madam, dear Sir, Thank you for your message for which I have the pleasure to communicate the following to you. The Commission has a different level of involvement in the designation procedures of the two types of sites involved in the Natura 2000 network (Special Protection Areas - SPAs designated under the 1979 Birds Directive and Special Conservation Areas - SACs - designated under the Hab…	Opinion	0	Reduce	1	1	Policy substantive	FR	0.0154512	0.6263	0.163054	0.0155357	0.0132427	0.0641368	0.0270934	0.0751861
e310	Y2016	2016-08-04	EU citizen	Citizen	Czechia	According to my experience more than 90% of EU law limit seriously my freedom of choose and take money out of my pocket for nothing. So stop it. Citizens of European countries know better than you (EU administration) what is good and acceptable for them. So let take decision on national level.	According to my experience more than 90% of EU law limit seriously my freedom of choose and take money out of my pocket for nothing. So stop it. Citizens of European countries know better than you (EU administration) what is good and acceptable for them. So let take decision on national level.	Thank you for your message to the website 'Lighten the load – Have your say'. This website is dedicated to collect views on how to make EU laws more effective and efficient, to identify actions for simplification and reduction of regulatory burden. To find out how Europe and its institutions are working, we recommend you contact the Commission's Europe Direct Service, which has been designed to a…	Thank you for your message to the website 'Lighten the load – Have your say'. This website is dedicated to collect views on how to make EU laws more effective and efficient, to identify actions for simplification and reduction of regulatory burden. To find out how Europe and its institutions are working, we recommend you contact the Commission's Europe Direct Service, which has been designed to a…	Opinion	0	Reduce	1	1	Competence	EN	0.0195825	0.0196145	0.0289369	0.016238	0.00704728	0.633977	0.0456091	0.228995
e311	Y2016	2016-08-04	EU citizen	Citizen	France	Le programme REFIT n'est qu'une vaste entreprise idéologique, qui sous couvert de simplification du droit, vise à détruite l'acquis social communautaire, et ce, sans aucune légitimité démocratique. Et les apparatchiks néolibéraux s'étonnent de la montée des populismes et du sentiment antieuropéen.	The REFIT program is just a vast ideological enterprise, which under the guise of simplifying the law, aims to destroy the Community social acquis, without any democratic legitimacy. And neoliberal apparatchiks are astonished at the rise of populism and anti-European sentiment.	Nous vous remercions pour votre opinion concernant le Programme REFIT et regrettons notre réponse tardive. REFIT est le programme de la Commission européenne pour une réglementation affûtée et performante. Il vise à rendre la législation de l'UE plus simple et à réduire les coûts induits par la réglementation, contribuant ainsi à la mise en place d'un cadre réglementaire clair, stable et prévisib…	We thank you for your opinion on the REFIT Program and regret our late response. REFIT is the European Commission's program for sharp and efficient regulation. It aims to make EU legislation simpler and reduce regulatory costs, thereby helping to establish a clear, stable and predictable regulatory framework that is favorable to growth and jobs. To achieve this goal, REFIT requires the collaborat…	Opinion	0	Neutral	0	1	Policy substantive	FR	0.0369741	0.204637	0.0344571	0.095699	0.0413243	0.218679	0.155677	0.212552
e312	Y2016	2016-08-06	EU citizen	Citizen	United Kingdom	Free movement is a wonderful thing but there are a few issues with it, Number 1 with the existence of different out of work benefits or top up benefits in all EU countries there is the possibility that some EU nationals would move in a country to use or abuse the social system, so I think that the EU as a whole should adopt one single type of reword for all Countries to mitigate this type of migr…	Free movement is a wonderful thing but there are a few issues with it. Number 1 with the existence of different out of work benefits or top up benefits in all EU countries there is the possibility that some EU nationals would move in a country to use or abuse the social system. so I think that the EU as a whole should adopt one single type of reword for all Countries to mitigate this type of migr…			Opinion	0	Harmonization	0	0		EN	0.00481799	0.00798498	0.00788534	0.00628224	0.00274704	0.910703	0.0107693	0.0488106
e314	Y2016	2016-08-11	EU citizen	Citizen	Germany	Die Europäische Union muss unter Beachtung des Subsidiaritätsprinzips in einer Reihe von Politikbereichen zusätzliche und genau festgelegte Kompetenzen erhalten. Dabei sind die Entwicklung einer wirksamen und verbindlichen Umweltpolitik in der Union und der soziale Ausgleich zwischen den reichen und ärmeren Regionen der Union und die Ausgestaltung der sozialen Dimension des Binnenmarktes ebenso u…	The European Union must be given additional and precisely defined powers in a number of policy areas, while respecting the principle of subsidiarity. The development of an effective and binding environmental policy in the Union and the social balance between the rich and poor regions of the Union and the shaping of the social dimension of the internal market are just as essential as a new underst…			Opinion	0	Increase	0	0		DE	0.0203193	0.456418	0.062581	0.089548	0.0278525	0.121367	0.147696	0.0742177
e315	Y2016	2016-08-12	Business association	Business	Germany	Nach einer Diskussionsveranstaltung in Brüssel am 2.12.2015 zu Problemen und Verbesserungsmöglichkeiten in Konsultationsprozessen aus Sicht der Wirtschaftsverbände haben wir viele konkrete Hinweise betroffener Verbände erhalten. Sie zeigen, dass es bei Konsultation sehr viele Verbesserungsmöglichkeiten gibt. Konsultationen zu verbessern, sollte auch ein Anliegen der REFIT-Plattform sein. Wir rege…	After a discussion in Brussels on 2.12.2015 on problems and improvements in consultation processes from the point of view of the business associations, we received many concrete references from affected associations. They show that there are many possibilities for improvement during consultation. Consultations should also be a concern of the REFIT platform. We encourage the employment of this sub…	Thank you for your message to the website 'Lighten the load – Have your say'. The Commission relies on high quality input from stakeholders in the regulatory process so it is very helpful that the 'Deuthscher Industrie- und Handelskammertag' brings to our attention challenges faced when responding to consultations. To reflect our commitment to high quality consultations and ongoing improvement, C…	Thank you for your message to the website 'Lighten the load – Have your say'. The Commission relies on high quality input from stakeholders in the regulatory process so it is very helpful that the 'Deuthscher Industrie- und Handelskammertag' brings to our attention challenges faced when responding to consultations. To reflect our commitment to high quality consultations and ongoing improvement, C…	Evidence	1	Increase	0	1	Procedural	DE	0.0677193	0.259466	0.0208173	0.0371745	0.0366428	0.0342138	0.319177	0.224789
e316	Y2016	2016-08-12	EU citizen	Citizen	Germany	Too little space in the form, please see my attachment.	Too little space in the form, please see my attachment.	Thank you for your letter, where you ask about the EU efforts to reduce GHG emissions from transport. You rightly pointed out that transport, and especially, aviation emissions are growing fast in the EU and also worldwide. Europe is working hard to cut its greenhouse gas emissions substantially in all economy sectors. The EU Emission Trading System (ETS) is a cornerstone of the European Union's …	Thank you for your letter, where you ask about the EU efforts to reduce GHG emissions from transport. You rightly pointed out that transport, and especially, aviation emissions are growing fast in the EU and also worldwide. Europe is working hard to cut its greenhouse gas emissions substantially in all economy sectors. The EU Emission Trading System (ETS) is a cornerstone of the European Union's …	Evidence	1	Increase	0	1	Policy substantive	EN	0.0344292	0.0986625	0.393544	0.180859	0.132567	0.054324	0.0535025	0.0521106
e317	Y2016	2016-09-13	EU citizen	Citizen	Austria	Dear all, wouldn’t it make sense (and save tremendous amounts of money) to have English as the only language spoken and written within the construct of the EU. English is the only language that is spoken learnt by everyone. I don't see benefits in the Translation of everything in any local language. If a Country want's Information/papers/laws. etc translated into their language, then let them do …	Dear all, wouldn’t it make sense (and save tremendous amounts of money) to have English as the only language spoken and written within the construct of the EU. English is the only language that is spoken learnt by everyone. I don't see benefits in the Translation of everything in any local language. If a Country want's Information/papers/laws. etc translated into their language, then let them do …			Opinion	0	Harmonization	0	0		EN	0.012126	0.0281059	0.0125347	0.0155909	0.0234739	0.581442	0.0272779	0.299449
e319	Y2016	2016-09-25	EU citizen	Citizen	Canada	Regarding Energy, Technology and Information, Earth is like a human body, the water flowing around it such as lakes, rivers, waterfalls and so on are designed perfectly to maintain the flow of life/energy, just like a human body has it's veins. Blocking this pathways by means of building cities, mining resources, wars and much more are the main cause of human sufferings because of man's selfish a…	Regarding Energy, Technology and Information, Earth is like a human body, the water flowing around it such as lakes, rivers, waterfalls and so on are designed perfectly to maintain the flow of life/energy, just like a human body has it's veins. Blocking this pathways by means of building cities, mining resources, wars and much more are the main cause of human sufferings because of man's selfish a…			Opinion	0	Increase	0	0		EN	0.0116543	0.378038	0.0335267	0.0133978	0.0140418	0.0282706	0.0282142	0.492857
e320	Y2016	2016-09-26	Public authority	Non-business org	Spain	Dear Sir/Madame, I am a civil servant working in the Better Regulation Unit in the Government of Catalonia, Spain. We are interested to introduce the use of Multi-criteria analysis in the impact assessment reports (IAR). For this purpose I have checked the Tool#57 – Multi-criteria analysis of your Better Regulation Toolbox that complements the Better Regulation Guidelines and the Final impact ass…	Dear Sir/Madame, I am a civil servant working in the Better Regulation Unit in the Government of Catalonia, Spain. We are interested to introduce the use of Multi-criteria analysis in the impact assessment reports (IAR). For this purpose I have checked the Tool#57 – Multi-criteria analysis of your Better Regulation Toolbox that complements the Better Regulation Guidelines and the Final impact ass…	The following impact assessment accompanying the Proposal for a Regulation of the European Parliament and of the Council amending Regulation (EU) No 99/2013 on the European statistical programme 2013-17, by extending it to 2018-20 [SWD/2016/0288 final - 2016/0265 (COD)] contains a good illustration how the multi-criteria technique can be used. http://eur-lex.europa.eu/search.html?qid=147550125177…	The following impact assessment accompanying the Proposal for a Regulation of the European Parliament and of the Council amending Regulation (EU) No 99/2013 on the European statistical programme 2013-17, by extending it to 2018-20 [SWD/2016/0288 final - 2016/0265 (COD)] contains a good illustration how the multi-criteria technique can be used. http://eur-lex.europa.eu/search.html?qid=147550125177…	Evidence	1	Neutral	0	1	Policy substantive	EN	0.0112103	0.033717	0.0115717	0.067754	0.526032	0.0165277	0.0998584	0.233329
e321	Y2016	2016-09-30	Public authority	Non-business org	Italy	My concern is the huge inconsistency in requirements to demonstrate safe production and use of chemicals. Various domains (consumer products and cosmetics, chemical production, pesticides and biocides, pharma, food, feed, food packaging etc) go with very dissimilar requirements with respect to hazard and exposure assessment. This prevents a level playing fields as well as tackling of the policy i…	My concern is the huge inconsistency in requirements to demonstrate safe production and use of chemicals. Various domains (consumer products and cosmetics, chemical production, pesticides and biocides, pharma, food, feed, food packaging etc) go with very dissimilar requirements with respect to hazard and exposure assessment. This prevents a level playing fields as well as tackling of the policy i…			Evidence	1	Harmonization	0	0		EN	0.00932614	0.40018	0.00520981	0.0125103	0.544707	0.00751657	0.0107424	0.00980833
e322	Y2016	2016-09-30	Other	Non-business org	South Africa	Please see the attached document.	Please see the attached document.	Thank you for your submission which is related to Commission Regulation No 543/2008. Please note that the Commission is currently carrying out an external 'Study on the state of play of processing technologies and the absorption of water in poultry meat' which covers the subject raised in your submission. The results of this study should be available by the end of 2016. The study is being underta…	Thank you for your submission which is related to Commission Regulation No 543/2008. Please note that the Commission is currently carrying out an external 'Study on the state of play of processing technologies and the absorption of water in poultry meat' which covers the subject raised in your submission. The results of this study should be available by the end of 2016. The study is being underta…	Evidence	1	Increase	0	1	Procedural	EN	0.0389615	0.107262	0.0230979	0.427322	0.255073	0.0494215	0.0544125	0.0444489
e323	Y2016	2016-10-03	Business association	Business	Belgium	Double legislation: We believe that the European Commission should prioritise regulating the energy efficiency of final products, instead of regulating the efficiency of components. Regulating both the final products and the components inside products – such as motor or fans – should be avoided	Double legislation: We believe that the European Commission should prioritise regulating the energy efficiency of final products, instead of regulating the efficiency of components. Regulating both the final products and the components inside products – such as motor or fans – should be avoided			Opinion	0	Reduce	1	0		EN	0.01476	0.483442	0.00751852	0.0205291	0.426673	0.0131685	0.0158422	0.0180667
e324	Y2016	2016-10-03	Business association	Business	Belgium	Enforceability: So far Ecodesign measures have been effective because they regulated measurable parameters, such as energy or water consumption in use. A shift towards material efficiency aspects – including durability, dismantleability, recyclability and reparability – without measurement methods that can allow market surveillance authorities to enforce the legislation will endanger the competit…	Enforceability: So far Ecodesign measures have been effective because they regulated measurable parameters, such as energy or water consumption in use. A shift towards material efficiency aspects – including durability, dismantleability, recyclability and reparability – without measurement methods that can allow market surveillance authorities to enforce the legislation will endanger the competit…	Thank you for your message to the website 'Lighten the load – Have your say'. This website is dedicated to collect views on how to make EU laws more effective and efficient, to identify actions for simplification and reduction of regulatory burden. Any Ecodesign requirements to be proposed by the Commission related to material efficiency need to be enforceable by market surveillance authorities. …	Thank you for your message to the website 'Lighten the load – Have your say'. This website is dedicated to collect views on how to make EU laws more effective and efficient, to identify actions for simplification and reduction of regulatory burden. Any Ecodesign requirements to be proposed by the Commission related to material efficiency need to be enforceable by market surveillance authorities. …	Evidence	1	Reduce	1	1	Competence	EN	0.0101768	0.320694	0.0047064	0.0199919	0.619058	0.00745321	0.0101951	0.00772389
e325	Y2016	2016-10-04	EU citizen	Citizen	Austria	Anti-Raucher-Kampagne Mir wurde von Europe Direct gesagt, ich könne mich mit meinem Anliegen an Sie wenden. Warum erlauben Sie nicht wieder Anti-Raucher-Werbung, diese war sehr erfolgreich, verbieten aber weiterhin Raucher-Werbung in den USA gab es Rückläufe auf Grund solcher Anti-Werbung. Bis beide, Werbung und Antiwerbung verboten wurde. Warum legen Sie nicht einen kleinen Zettel den Zigaretten…	Anti-Smoking Campaign I have been told by Europe Direct that I can contact you with my request. Why don't you allow anti-smoking advertising again, this has been very successful, but continues to ban smoking advertising in the US, there have been returns due to such anti-advertising. Until both advertising and anti-advertising were banned. Why not put a small piece of paper with the cigarettes: F…	Thank you for your query. Tobacco advertising with cross-border relevance is banned in the EU. Some Member States have also complemented these bans with restrictions on tobacco advertising at local level. Although the EU has funded anti-smoking campaigns in the past, such as 'Ex-smokers are unstoppable', most anti-smoking campaigns are national to ensure that they better target citizens in indivi…	Thank you for your query. Tobacco advertising with cross-border relevance is banned in the EU. Some Member States have also complemented these bans with restrictions on tobacco advertising at local level. Although the EU has funded anti-smoking campaigns in the past, such as 'Ex-smokers are unstoppable', most anti-smoking campaigns are national to ensure that they better target citizens in indivi…	Evidence	1	Increase	0	1	Policy substantive	DE	0.232984	0.01008	0.00589542	0.211	0.00613468	0.0116164	0.00913066	0.513158
e326	Y2016	2016-10-12	Company/business org	Business	Belgium	Absence de plan comptable européen. Cela engendre beaucoup de complications et d'efforts inutiles, génère des risques de confusion (exemple: 400 = compte client en Belgique et compte fournisseur en France!). L'économie potentielle est 'in-chiffrable'! Suggestion: 1. Proposer (rapidement!) un plan comptable européen (défini avec l'aide d'un spécialiste en codification et en informatique SVP de man…	Lack of a European chart of accounts. This generates a lot of complications and unnecessary efforts, generates risks of confusion (example: 400 = customer account in Belgium and supplier account in France!). The potential savings are 'un-quantifiable'! Suggestion: 1. Propose (quickly!) A European chart of accounts (defined with the help of a codification and IT specialist, please, so as to ensure…	Monsieur, Au nom de la Plateforme REFIT, nous vous remercions pour votre soumission sur l’efficacité, l’efficience et la réduction des charges administratives liées à la règlementation européenne. Après une analyse détaillée de votre soumission, la Plateforme a décidé de ne pas préparer une Opinion sur les sujets que vous avez soulevés. La raison étant que ces sujets sont couverts par une mesure …	Monsieur, Au nom de la Plateforme REFIT, nous vous remercions pour votre soumission sur l’efficacité, l’efficience et la réduction des charges administratives liées à la règlementation européenne. Après une analyse détaillée de votre soumission, la Plateforme a décidé de ne pas préparer une Opinion sur les sujets que vous avez soulevés. La raison étant que ces sujets sont couverts par une mesure …	Evidence	1	Harmonization	0	1	Procedural	FR	0.00681213	0.0519737	0.0537734	0.0150928	0.00955981	0.0207549	0.821748	0.0202857
e327	Y2016	2016-10-16	Company/business org	Business	Croatia	The regulations required for producing a melt and pour style soap are prohibitive to small business. This soap is produced from raw materials already tested by EU cosmetics laws and made according to similar recipes all over Europe. Why the need for each company to have the same recipe certified and tested at a cost of around €100 each. Also in Croatia interpretation of law is so that you need a …	The regulations required for producing a melt and pour style soap are prohibitive to small business. This soap is produced from raw materials already tested by EU cosmetics laws and made according to similar recipes all over Europe. Why the need for each company to have the same recipe certified and tested at a cost of around €100 each. Also in Croatia interpretation of law is so that you need a …	On behalf of the REFIT Platform, thank you for submitting your suggestion on the efficiency, effectiveness or burden reduction of EU regulation or its implementation by Member States. Your suggestion has not been prioritised for the work of the Platform in the coming months. The REFIT Platform aims to cover all suggestions over time and your suggestion will be considered for possible take up late…	On behalf of the REFIT Platform, thank you for submitting your suggestion on the efficiency, effectiveness or burden reduction of EU regulation or its implementation by Member States. Your suggestion has not been prioritised for the work of the Platform in the coming months. The REFIT Platform aims to cover all suggestions over time and your suggestion will be considered for possible take up late…	Evidence	1	Reduce	1	1	Procedural	EN	0.0233269	0.470565	0.00837984	0.0198683	0.260166	0.0150258	0.017992	0.184676
e328	Y2016	2016-10-17	EU citizen	Citizen	Germany	Aktueller konsolidierter Text and zu den Vorschlägen der Kommission für eine Verordnung des Europäischen Parlaments und des Rates über Medizinprodukte sowie zur Änderung der Richtlinie 2001/83/EG und der Verordnungen(EG) Nr. 178/2002 und (EG) Nr. 1223/2009 (MDR) sowie In-vitro-Diagnostika (IVDR). Anliegen: Neben der Schließung von Regelungslücken in bestimmten Produktbereichen bestehen die wichti…	Current consolidated text and on the Commission's proposals for a regulation of the European Parliament and of the Council on medical devices as well as amending Directive 2001/83 / EC and Regulations (EC) No. 178/2002 and (EC) No. 1223/2009 (MDR) as well as in-vitro diagnostics (IVDR). Issue: In addition to closing regulatory loopholes in certain product areas, the most important overarching goa…	On behalf of the REFIT Platform, thank you for submitting your suggestion on the efficiency, effectiveness or burden reduction of EU regulation or its implementation by Member States. The Platform has concluded that it does not intend to prepare an Opinion on the issues raised. This is because the issues are covered by an EU legislative proposal recently agreed by the European Parliament and Coun…	On behalf of the REFIT Platform, thank you for submitting your suggestion on the efficiency, effectiveness or burden reduction of EU regulation or its implementation by Member States. The Platform has concluded that it does not intend to prepare an Opinion on the issues raised. This is because the issues are covered by an EU legislative proposal recently agreed by the European Parliament and Coun…	Evidence	1	Reduce	1	1	Procedural	DE	0.0107263	0.52689	0.00745979	0.395919	0.0313422	0.007449	0.0134542	0.00675939
e329	Y2016	2016-10-21	EU citizen	Citizen	Spain	I believe the EU is great, I really think the union makes us strong and, all together, can accomplish amazing things but, there´s a little problem: people still don`t feel European and, without that feeling, we can't really cooperate and accomplish those great things. I think we should put more effort on strengthening, on making a European feeling maybe through the creation of common things such …	I believe the EU is great, I really think the union makes us strong and, all together, can accomplish amazing things but, there´s a little problem: people still don`t feel European and, without that feeling, we can't really cooperate and accomplish those great things. I think we should put more effort on strengthening, on making a European feeling maybe through the creation of common things such …			Opinion	0	Increase	0	0		EN	0.0074264	0.0145835	0.357314	0.00672272	0.00236235	0.0447231	0.0160016	0.550866
e330	Y2016	2016-10-26	EU citizen	Citizen	Romania	Is there a way to enforce public consultations at a Member State level? How does the European Commission make sure that people all around Europe participate in a rather equal manner to the decision making process? How do you stimulate this participation in Member States where citizens are not used to stating their views as much as in other Member States?	Is there a way to enforce public consultations at a Member State level? How does the European Commission make sure that people all around Europe participate in a rather equal manner to the decision making process? How do you stimulate this participation in Member States where citizens are not used to stating their views as much as in other Member States?	Many thanks for your submission. 'The Treaty on European Union specifies that the European Commission shall carry out broad consultations in areas of Union action in order to ensure that Union's actions are coherent and transparent. In order to do so, the Commission organises for its major initiatives and evaluations public web based consultations which can be accessed by all EU citizens via the …	Many thanks for your submission. 'The Treaty on European Union specifies that the European Commission shall carry out broad consultations in areas of Union action in order to ensure that Union's actions are coherent and transparent. In order to do so, the Commission organises for its major initiatives and evaluations public web based consultations which can be accessed by all EU citizens via the …	Opinion	0	Neutral	0	1	Competence	EN	0.0102671	0.0295982	0.0669633	0.0265528	0.00905977	0.578088	0.223014	0.0564563
e331	Y2016	2016-10-27	EU citizen	Citizen	Czechia	Legislativní pravidla vlády předávají ve všech článcích, které se odpovědnosti týkají, odpovědnost z vlády na předkladatele návrhu zákona bez uvedení sankce. Ačkoliv tato pravidla jsou pouze vnitřním předpisem a ne právním předpisem, pozastavuji se nad nedokonalostí jejich znění právě v oblasti odpovědnosti. Pravidla se na první pohled jeví jako skvělá - z hlediska výčtu všech povinných součástí …	In all articles concerning liability, the legislative rules of the government transfer the responsibility from the government to the submitter of the bill without stating a sanction. Although these rules are only an internal regulation and not a legal regulation, I dwell on the imperfection of their wording in the area of ​​liability. At first glance, the rules seem to be great - in terms of list…			Evidence	1	Increase	0	0		CZ	0.00847308	0.130561	0.0731343	0.444371	0.288163	0.00886558	0.0365938	0.00983803
e332	Y2016	2016-10-31	Other	Citizen	Belgium	Volkssoevereiniteit, ik eis mijn macht terug, aanpassing en afschaffing van niet volks gestemde regels die Europese Burger benadelen of erdoor benadelend voelen. Erkenning van nationale en regionale wetgeving. Iedereen zou moeten kunnen stemmen en impact hebben op regionale nationale Europees beleid. Hoe? Door digitale directe democratie, iedereen is vrij om twee wekelijks digitaal via smartphone…	Popular sovereignty, I demand back my power, adaptation and abolition of non-popularized rules that disadvantage or feel disadvantageous to European Citizens. Recognition of national and regional legislation. Everyone should be able to vote and have an impact on regional national European policy. How? Through digital direct democracy, everyone is free to vote bi-weekly digitally via smartphone or…			Opinion	0	Increase	0	0		NL	0.0369813	0.10244	0.0201843	0.13449	0.0146892	0.273213	0.185759	0.232244
e333	Y2016	2016-11-16	EU citizen	Citizen	Italy	Good evening! I'm Nicolò de Bigontina, an Italian citizen, and I've just moved to the UK. One of the first things I noticed here was the presence of one and only of plugs and sockets for everything, which I think it helps a lot in terms of convenience, but above all security. Indeed, in Italy, which is one of the central states of the EU, we constantly come across loads of different types of plug…	Good evening! I'm Nicolò de Bigontina, an Italian citizen, and I've just moved to the UK. One of the first things I noticed here was the presence of one and only of plugs and sockets for everything, which I think it helps a lot in terms of convenience, but above all security. Indeed, in Italy, which is one of the central states of the EU, we constantly come across loads of different types of plug…	On behalf of the REFIT Platform, we would like to inform you that on 21 September 2017 the REFIT Platform has adopted an opinion on your suggestion regarding "International Standard Domestic Power plugs and sockets" (REFIT Platform ref. XII.24.a). The adopted Opinion has been published on the REFIT Platform's website. The follow-up to this adopted opinion will be made in the context of the prepar…	On behalf of the REFIT Platform, we would like to inform you that on 21 September 2017 the REFIT Platform has adopted an opinion on your suggestion regarding "International Standard Domestic Power plugs and sockets" (REFIT Platform ref. XII.24.a). The adopted Opinion has been published on the REFIT Platform's website. The follow-up to this adopted opinion will be made in the context of the prepar…	Evidence	1	Harmonization	0	1	Adoption	EN	0.0103531	0.0167904	0.0807352	0.00779707	0.00283827	0.643801	0.0218774	0.215808
e334	Y2016	2016-11-22	EU citizen	Citizen	Bulgaria	Reading legal acts: introducing a table of contents would significantly facilitate going through EU legislation. Take Regulation (EU) 1308/2013 for example - 207 recitals and 232 articles. Although practitioners in the field would be familiar with its scope, it would be considerably easier to be able to rely on some table of contents as guidance on what to look for and where to find it. Introduci…	Reading legal acts: introducing a table of contents would significantly facilitate going through EU legislation. Take Regulation (EU) 1308/2013 for example - 207 recitals and 232 articles. Although practitioners in the field would be familiar with its scope, it would be considerably easier to be able to rely on some table of contents as guidance on what to look for and where to find it. Introduci…	Thank you for your feedback. You question has not been misunderstood. Our reply mentioned parts, titles, chapters and sections of the acts. These, as well as 'tables', are found among others in the Inter-institutional Style Guide, see for instance section 2.7. Subdivisions of acts. As explained, these are devices to deal with complexity and structure. They are part of the formal rules on legislat…	Thank you for your feedback. You question has not been misunderstood. Our reply mentioned parts, titles, chapters and sections of the acts. These, as well as 'tables', are found among others in the Inter-institutional Style Guide, see for instance section 2.7. Subdivisions of acts. As explained, these are devices to deal with complexity and structure. They are part of the formal rules on legislat…	Evidence	1	Reduce	1	1	Procedural	EN	0.0128104	0.114071	0.0160509	0.402651	0.0357417	0.0314848	0.34156	0.0456296
e335	Y2016	2016-12-02	Business association	Business	Italy	The Consumer Credit Directive 2008/48/Ec (Ccd) Recital 9 of Directive 2008/48/EC states that one of its core objectives is “to ensure that all consumers in the Community enjoy a high and equivalent level of protection of their interests”. Article 4, in particular, states that in any advertising concerning credit agreements, standard information that’s provided has to indicate an interest rate or …	The Consumer Credit Directive 2008/48/Ec (Ccd) Recital 9 of Directive 2008/48/EC states that one of its core objectives is “to ensure that all consumers in the Community enjoy a high and equivalent level of protection of their interests”. Article 4, in particular, states that in any advertising concerning credit agreements, standard information that’s provided has to indicate an interest rate or …	On behalf of the REFIT Platform, we would like to inform you that on 21 September 2017 the REFIT Platform has adopted an opinion on your suggestion regarding the Directive on Credit Agreements for Consumers (REFIT Platform ref.VI.4.f). The adopted Opinion has been published on the REFIT Platform's website . The follow-up to this adopted opinion will be made in the context of the preparation of th…	On behalf of the REFIT Platform, we would like to inform you that on 21 September 2017 the REFIT Platform has adopted an opinion on your suggestion regarding the Directive on Credit Agreements for Consumers (REFIT Platform ref.VI.4.f). The adopted Opinion has been published on the REFIT Platform's website . The follow-up to this adopted opinion will be made in the context of the preparation of th…	Evidence	1	Reduce	1	1	Adoption	EN	0.584717	0.106401	0.021387	0.0469756	0.147036	0.0133441	0.0532792	0.0268603
e336	Y2016	2016-12-05	Company/business org	Business	Netherlands	De deponeringstermijn voor besloten vennootschappen is onbedoeld verkort als gevolg van de flexwet. Suggestion: Door de flexibilisering van het BV-recht is het voor BV’s waarin alle aandeelhouders tevens bestuurder zijn eenvoudiger om de jaarrekening vast te stellen.Het bestuur van de vennootschap is verplicht binnen 5 maanden na afloop van het boekjaar een jaarrekening op te stellen. Deze termij…	The filing period for private companies has been unintentionally shortened as a result of the flexi-law act. Suggestion: Due to the flexibilisation of BV law, it is easier for BVs in which all shareholders are also directors to adopt the annual accounts. The management of the company is obliged to prepare annual accounts within 5 months after the end of the financial year. This term can be extend…	12 May 2017 Thank you for submitting your suggestion to "Lighten the Load have your say". The issues raised in your submission concern the national implementation of an EU measure. For this reason, the members of the REFIT Platform consider that your concerns would be best addressed by the Dutch Authorities competent in the area (National Register: Kamer van Koophandel - https://www.kvk.nl/ (http…	12 May 2017 Thank you for submitting your suggestion to "Lighten the Load have your say". The issues raised in your submission concern the national implementation of an EU measure. For this reason, the members of the REFIT Platform consider that your concerns would be best addressed by the Dutch Authorities competent in the area (National Register: Kamer van Koophandel - https://www.kvk.nl/ (http…	Evidence	1	Reduce	1	1	Competence	NL	0.00552487	0.00822633	0.00598354	0.138197	0.0079943	0.0107941	0.813198	0.010082
e337	Y2016	2016-12-08	EU citizen	Citizen	Turkey	You try to decrease co2 and greenhouse gasses which are emitted from cars with Regulation (EC) 443/2009. This is a really good idea for us and future generations. But in fact, the regulation does not work as it was intended. Since cars are only tested under the condition that defined in your regulations such as EU Directive 93/116.Since every new car has more electronic components in their engine…	You try to decrease co2 and greenhouse gasses which are emitted from cars with Regulation (EC) 443/2009. This is a really good idea for us and future generations. But in fact, the regulation does not work as it was intended. Since cars are only tested under the condition that defined in your regulations such as EU Directive 93/116.Since every new car has more electronic components in their engine…	The Commission is fully aware of the difference between CO2 emissions measured under laboratory conditions using the NEDC test cycle and the emissions during “real driving”. The factors affecting this discrepancy have been reviewed the Commission’s Joint Research Centre (JRC) in a recently published report: "Review of in use factors affecting the fuel consumption and CO2 emissions of passenger ca…	The Commission is fully aware of the difference between CO2 emissions measured under laboratory conditions using the NEDC test cycle and the emissions during “real driving”. The factors affecting this discrepancy have been reviewed the Commission’s Joint Research Centre (JRC) in a recently published report: "Review of in use factors affecting the fuel consumption and CO2 emissions of passenger ca…	Evidence	1	Increase	0	1	Policy substantive	EN	0.0230771	0.0843069	0.382013	0.272459	0.0158288	0.021517	0.0216248	0.179174
e339	Y2016	2016-12-12	EU citizen	Citizen	Spain	Buenas tardes. Me gustaría conocer si el nuevo ACuerdo institucional previsto en la "Comunicación sobre COMUNICACIÓN DE LA COMISIÓN AL PARLAMENTO EUROPEO, AL CONSEJO, AL COMITÉ ECONÓMICO Y SOCIAL EUROPEO Y AL COMITÉ DE LAS REGIONES Legislar mejor para obtener mejores resultados -Un programa de la UE" ya se ha promulgado o, en su caso, el estado en el que se encuentra. Ruego la máxima celeridad en…	"Good afternoon. I would like to know if the new institutional Agreement foreseen in the" "Communication on COMMUNICATION FROM THE COMMISSION TO THE EUROPEAN PARLIAMENT, AL COUNCIL, THE EUROPEAN ECONOMIC AND SOCIAL COMMITTEE AND THE COMMITTEE OF REGIONS Better regulation for better results -An EU program "" has already been enacted or, where appropriate, the state in which it is located. I beg th…	Many thanks for your submission in the lighten the load – have your say. Concerning your question the Interinstitutional Agreement on Better Law-Making was signed by the European Parliament, the Council of the European Union and the European Commission on 13 April 2016. It was published in the Official Journal on 12 May 2016 (OJ L123, 12.5.2016, p.1.) and is in force following signature. The text…	Many thanks for your submission in the lighten the load – have your say. Concerning your question the Interinstitutional Agreement on Better Law-Making was signed by the European Parliament, the Council of the European Union and the European Commission on 13 April 2016. It was published in the Official Journal on 12 May 2016 (OJ L123, 12.5.2016, p.1.) and is in force following signature. The text…	Opinion	0	Neutral	0	1	Procedural	ES	0.0189213	0.026873	0.0283695	0.402993	0.0178614	0.0549463	0.358652	0.0913834
e340	Y2016	2016-12-14	EU citizen	Citizen	Portugal	La pauvreté croissante de la population portugaise.Le SMIC portugais est si bas qu'il ne permet pas à un travailleur de faire face à ses dépenses mensuelles, et personne ne semble se préoccuper de cela.Actuellement le SMIC est de 530€ net, soit 471,70€ net.Le problème est le suivant : avec ce montant vous ne pouvez pas vivre.Un appartement ronde les 400€/mois, car l'État ne plafonne pas les loyer…	The growing poverty of the Portuguese population. The Portuguese minimum wage is so low that it does not allow a worker to meet their monthly expenses, and no one seems to care about that. Currently the minimum wage is 530 € net, that is to say € 471.70 net The problem is as follows: with this amount you cannot live An apartment around € 400 / month, because the state does not cap rents You have …			Opinion	0	Increase	0	0		FR	0.211575	0.0209976	0.0107956	0.0058542	0.00467673	0.0246083	0.0107234	0.710769
e341	Y2016	2016-12-17	EU citizen	Citizen	Germany	Man hört immer wieder, dass noch Uralt-Gesetze inkraft sind, die ihre Bedeutung und Sinnhaftigkeit längst verloren haben. Könnte man nicht ein Gesetz beschließen, das verlangt, dass alle Gesetze, die älter sind als xxx Jahre, daraufhin überprüft werden, inwieweit sie noch weiterhin Gültigkeit haben oder abgeschafft werden sollen? Könnten nicht alle neuen Gesetze eine Klausel enthalten, die verlan…	One hears again and again that ancient laws are still in force that have long since lost their meaning and meaning. Couldn't a law be passed that requires all laws that are older than xxx years to be reviewed to determine to what extent they are still valid or should be abolished? Couldn't all new laws contain a clause that requires that the law be reviewed every e.g. 5 years to see whether it sh…	vielen Dank für Ihre Nachricht, die Sie uns über die Internetseite „Bürokratieabbau – Ihre Meinung zählt!“ übermittelt haben. Die Europäische Kommission ist entschlossen, Änderungen herbeizuführen, und zwar sowohl bei dem, was die Europäische Union (EU) tut, als auch in der Art und Weise, wie sie es tut. Im Mai 2015 veröffentlichte die Kommission ihre Better Regulation-Agenda (auf Deutsch: „Besse…	"Thank you for your message, which you sent us via the" Reduce bureaucracy - your opinion counts! "website. The European Commission is determined to make changes, both in what the European Union (EU) does and the way it does it. In May 2015 the Commission published its Better Regulation Agenda (in German: “Better Regulation”) in which it has summarized its activities for more effective “EU legisl…	Opinion	0	Increase	0	1	Procedural	DE	0.02236	0.247777	0.0144395	0.0455053	0.18823	0.398514	0.0502047	0.0329697
e342	Y2016	2016-12-17	Company/business org	Business	Germany	Unser Unternehmen vermittelt Ferienhausmietverhältnisse in Italien. Aufgrund des Belegenheitsprinzips sind wir bezüglich der von uns erwirtschafteten Provisionen in Italien umsatzsteuerpflichtig. Wir mussten folglich einen dort ansässigen Fiskalverteter wählen, um über diesen die fällige Steuer in Italien zu deklarieren und abzuführen. Da dieser Fiskalvertreter dem italienischen Staat gegenüber f…	Our company arranges holiday home rentals in Italy. Due to the principle of location, we are subject to sales tax in Italy on the commissions we earn. We therefore had to choose a local tax representative to declare and pay the tax due in Italy through him. Since this fiscal representative is liable to the Italian state for our tax liabilities, he (like all of his colleagues we asked) is paying h…	On behalf of the REFIT Platform, thank you for submitting your suggestion on the efficiency, effectiveness or burden reduction of EU regulation or its implementation by Member States. The Platform has concluded that it does not intend to prepare an opinion on the issues raised. Your suggestion has been forwarded to the Commission service responsible for the relevant policy area which has produced…	On behalf of the REFIT Platform, thank you for submitting your suggestion on the efficiency, effectiveness or burden reduction of EU regulation or its implementation by Member States. The Platform has concluded that it does not intend to prepare an opinion on the issues raised. Your suggestion has been forwarded to the Commission service responsible for the relevant policy area which has produced…	Opinion	0	Harmonization	0	1	Competence	DE	0.695419	0.0259017	0.180756	0.0194328	0.00727886	0.0249053	0.0176188	0.0286875
e347	Y2017	2017-01-17	Business association	Business	Belgium	Cefic supports the aims and principles of the IED but believes that the process by which reference documents for best available techniques (BREFs) are elaborated and reviewed at EU level could be more efficient. The chemical industry is covered by ten chemical and various other BREFs. Each time a BREF is reviewed, companies must dedicate significant time and efforts to compile and submit data set…	Cefic supports the aims and principles of the IED but believes that the process by which reference documents for best available techniques (BREFs) are elaborated and reviewed at EU level could be more efficient. The chemical industry is covered by ten chemical and various other BREFs. Each time a BREF is reviewed, companies must dedicate significant time and efforts to compile and submit data set…	On behalf of the REFIT Platform, we would like to inform you that on 21 September 2017 the REFIT Platform has adopted an opinion on your suggestion regarding the Best Available Techniques (BREFs) in Chemical Industry (REFIT Platform ref. IX.6.b). The adopted Opinion has been published on the REFIT Platform's website . The follow-up to this adopted opinion will be made in the context of the prepar…	On behalf of the REFIT Platform, we would like to inform you that on 21 September 2017 the REFIT Platform has adopted an opinion on your suggestion regarding the Best Available Techniques (BREFs) in Chemical Industry (REFIT Platform ref. IX.6.b). The adopted Opinion has been published on the REFIT Platform's website . The follow-up to this adopted opinion will be made in the context of the prepar…	Evidence	1	Reduce	1	1	Adoption	EN	0.00688682	0.700932	0.00365957	0.00820882	0.259667	0.00424203	0.0110894	0.00531495
e349	Y2017	2017-01-20	Other	Citizen	Netherlands	My concern is that REFIT is too late and too little for the current anti-europe nationalist sentiments. I would suggest to return/ redefine to the EU core business and be flawless on the internet (I just encountered 2 faulty links). EU works best in long term (10+ years). Populist politicians have a much shorter time horizon.	My concern is that REFIT is too late and too little for the current anti-europe nationalist sentiments. I would suggest to return/ redefine to the EU core business and be flawless on the internet (I just encountered 2 faulty links). EU works best in long term (10+ years). Populist politicians have a much shorter time horizon.			Opinion	0	Neutral	0	0		EN	0.0610467	0.130106	0.178718	0.0231496	0.0196943	0.0440172	0.0768297	0.466439
e350	Y2017	2017-02-06	EU citizen	Citizen	Spain	Quisiera acceder a la información los resultados de un estudio externo sobre los métodos de evaluación de los costes y beneficios de la normativa, que supondrá una aportación para la actualización de las directrices sobre la evaluación de impacto (información recogida en la COM/2014/0368 final) y cuyo enlace de la nota a pie de página n.º 57 se encuentra roto	I would like to access the information on the results of an external study on the methods for evaluating the costs and benefits of the regulations, which will provide input for updating the guidelines on impact assessment (information collected in COM / 2014/0368 final) and whose link in footnote 57 is broken "	Thank you for your email and your submission in the “Lighten the load-have your say”. Please find the link to footnote 57 as requested: http://ec.europa.eu/smart-regulation/impact/commission_guidelines/docs/1... Kind regards,	Thank you for your email and your submission in the “Lighten the load-have your say”. Please find the link to footnote 57 as requested: http://ec.europa.eu/smart-regulation/impact/commission_guidelines/docs/1... Kind regards,	Opinion	0	Neutral	0	1	Procedural	ES	0.158907	0.054632	0.00974923	0.0437447	0.657207	0.0226767	0.0317456	0.0213373
e352	Y2017	2017-03-31	EU citizen	Citizen	Germany	Sehr geehrte Damen und Herren, ich schlage vor, die Brüssel-IIa-Verordnung in folgenden Punkten zu verbessern: 1.) Die Bescheinigung nach Artikel 39 wird mehrsprachig gestaltet, z. B. englisch, französisch, deutsch und in derjenigen Sprache des Staates, in dem die Bescheinigung ausgestellt wird. 2.) Es wird geregelt, dass für die in den EU-Staaten teilweise eingeführten Privatscheidungen (z. B. i…	Dear Ladies and Gentlemen, I propose to improve the Brussels IIa Regulation in the following points: 1.) The certificate according to Article 39 is multilingual, e. B. English, French, German and in the language of the country in which the certificate is issued. 2.) It is stipulated that the Brussels IIa regulation is applicable for the private divorce partially introduced in the EU states (e.g. …			Opinion	0	Harmonization	0	0		DE	0.0135477	0.0650021	0.0260221	0.043401	0.124878	0.686607	0.0228954	0.0176463
e353	Y2017	2017-03-31	Public authority	Non-business org	Latvia	Please find in the attachment suggestions and activities recognized at working-seminars (2016) for businesses and NGO's, that could be implemented at the EU level. They cover 7 policy areas: collaborative/ sharing economy, intellectual property framework, public procurement, mutual recognition, prevention of non-compliant products in the EU market, cloud computing and free flow of data, reducing …	Please find in the attachment suggestions and activities recognized at working-seminars (2016) for businesses and NGO's, that could be implemented at the EU level. They cover 7 policy areas: collaborative/ sharing economy, intellectual property framework, public procurement, mutual recognition, prevention of non-compliant products in the EU market, cloud computing and free flow of data, reducing …	New reply for IV.5.a: On behalf of the REFIT Platform, thank you for submitting your suggestion on the efficiency, effectiveness or burden reduction of EU regulation or its implementation by Member States. The Platform has concluded that it does not intend to prepare an opinion on the issues raised. This is because the issues are partially covered a by the proposal of the Free flow of data Regula…	New reply for IV.5.a: On behalf of the REFIT Platform, thank you for submitting your suggestion on the efficiency, effectiveness or burden reduction of EU regulation or its implementation by Member States. The Platform has concluded that it does not intend to prepare an opinion on the issues raised. This is because the issues are partially covered a by the proposal of the Free flow of data Regula…	Evidence	1	Increase	0	1	Procedural	EN	0.0708029	0.20261	0.0133354	0.215475	0.330787	0.0674514	0.0767962	0.0227417
e354	Y2017	2017-04-05	Public authority	Non-business org	Finland	Construction Products Regulation has partly failed to function coherently. Some problematic articles of the CPR should be more clear and pragmatic. With the submission by Finland the extra burden for manufacturers and authorities, resulting from the functional incoherent lines of the CPR, can be reduced without undermining highly important policy objectives in the EU’s single market with the comm…	Construction Products Regulation has partly failed to function coherently. Some problematic articles of the CPR should be more clear and pragmatic. With the submission by Finland the extra burden for manufacturers and authorities, resulting from the functional incoherent lines of the CPR, can be reduced without undermining highly important policy objectives in the EU’s single market with the comm…	6 December 2017. On behalf of the REFIT Platform, we would like to inform you that on 23 November the REFIT Platform has adopted an opinion on your suggestion regarding "construction product regulation" (REFIT Platform ref. XII.8.c). The adopted Opinion is attached to this e-mail and has also been published on the REFIT Platform's website (https://ec.europa.eu/info/law/law-making-process/overview…	6 December 2017. On behalf of the REFIT Platform, we would like to inform you that on 23 November the REFIT Platform has adopted an opinion on your suggestion regarding "construction product regulation" (REFIT Platform ref. XII.8.c). The adopted Opinion is attached to this e-mail and has also been published on the REFIT Platform's website (https://ec.europa.eu/info/law/law-making-process/overview…	Evidence	1	Harmonization	0	1	Adoption	EN	0.00351817	0.0102568	0.001091	0.493187	0.482364	0.00248744	0.00501241	0.00208289
e355	Y2017	2017-04-06	EU citizen	Citizen	Sweden	För närvarande pågår en revision av EU:s förordning 98/2013 om sprängämnesprekursorer. Jag föreslår att denna i samband med revisionen kompletteras med en paragraf som fastslår att privatpersoner som beviljats tillverkningstillstånd för explosiv vara är undantagna från förordningen och tillåts förvärva, inneha, och hantera de prekursorer som behövs för den tillverkning som omfattas av tillståndet…	A revision of EU Regulation 98/2013 on explosives precursors is currently under way. I propose that this be supplemented in connection with the audit with a section stating that private individuals who have been granted a manufacturing license for explosives are exempt from the regulation and are allowed to acquire, possess, and manage the precursors needed for the manufacturing covered by the li…	On behalf of the REFIT Platform, we would like to inform you that on 21 September 2017 the REFIT Platform has adopted an opinion on your suggestion regarding the EU Regulation 98/2013 on Explosive Precursors (REFIT Platform ref.XXI.2.b) The adopted Opinion is attached to this e-mail and has also been published on the REFIT Platform's website . The follow-up to this adopted opinion will be made in…	On behalf of the REFIT Platform, we would like to inform you that on 21 September 2017 the REFIT Platform has adopted an opinion on your suggestion regarding the EU Regulation 98/2013 on Explosive Precursors (REFIT Platform ref.XXI.2.b) The adopted Opinion is attached to this e-mail and has also been published on the REFIT Platform's website . The follow-up to this adopted opinion will be made in…	Evidence	1	Increase	0	1	Adoption	EN	0.0252637	0.056474	0.0319478	0.186356	0.0370158	0.0557057	0.54191	0.0653273
e356	Y2017	2017-04-06	Business association	Business	Belgium	Policy Area Environment Legislation Commission Decision 2000/532 establishing a list of wastes pursuant to Directive 2008/98 on waste Context The list of wastes is the EU reference nomenclature for the classification of wastes. Any waste marked with an asterisk (*) (‘absolute hazardous entry’) in the EU list of waste must be considered as hazardous waste unless it is produced by households. A was…	Policy Area Environment Legislation Commission Decision 2000/532 establishing a list of wastes pursuant to Directive 2008/98 on waste Context The list of wastes is the EU reference nomenclature for the classification of wastes. Any waste marked with an asterisk (*) (‘absolute hazardous entry’) in the EU list of waste must be considered as hazardous waste unless it is produced by households. A was…	On behalf of the REFIT Platform, thank you for submitting your suggestion on the efficiency, effectiveness or burden reduction of EU regulation or its implementation by Member States. In the context of the Circular Economy Package, the Commission has proposed an amendment of the Waste Framework Directive, which is currently being examined by the European Parliament and Council. Therefore, the Pla…	On behalf of the REFIT Platform, thank you for submitting your suggestion on the efficiency, effectiveness or burden reduction of EU regulation or its implementation by Member States. In the context of the Circular Economy Package, the Commission has proposed an amendment of the Waste Framework Directive, which is currently being examined by the European Parliament and Council. Therefore, the Pla…	Evidence	1	Harmonization	0	1	Procedural	EN	0.00235972	0.0326956	0.000527072	0.00419656	0.955186	0.00117771	0.00247584	0.0013818
e357	Y2017	2017-04-18	Business association	Business	Belgium	Context: Biocides are products containing one or more active substances that will – in very small doses – repel, control or destroy harmful organisms. Biocides are essential in our everyday lives for the purposes of prevention and protection: they are used for instance to keep drinking water fit for human consumption, clean hospital surfaces and extend the shelf-life of consumer products to avoid…	Context: Biocides are products containing one or more active substances that will – in very small doses – repel, control or destroy harmful organisms. Biocides are essential in our everyday lives for the purposes of prevention and protection: they are used for instance to keep drinking water fit for human consumption, clean hospital surfaces and extend the shelf-life of consumer products to avoid…			Evidence	1	Reduce	1	0		EN	0.00203096	0.048479	0.000631843	0.00352141	0.939767	0.00125283	0.00265972	0.00165701
e359	Y2017	2017-04-18	Business association	Business	Belgium	Context: The Biocidal Products Regulation establishes specific labelling requirements for treated articles. Treated articles are substances, mixtures or articles that have been treated with biocides or that intentionally incorporate biocides. Products such as paints, textile, computer keyboards, door handles may qualify as treated articles. As per Article 58(3) of the Biocidal Product Regulation,…	Context: The Biocidal Products Regulation establishes specific labelling requirements for treated articles. Treated articles are substances, mixtures or articles that have been treated with biocides or that intentionally incorporate biocides. Products such as paints, textile, computer keyboards, door handles may qualify as treated articles. As per Article 58(3) of the Biocidal Product Regulation,…			Evidence	1	Reduce	1	0		EN	0.00130214	0.00900898	0.000229691	0.00239522	0.984202	0.000601719	0.00141549	0.000844933
e360	Y2017	2017-05-22	EU citizen	Citizen	Portugal	AFSCHAFFING VAN DE BTW (in stappen) De BTW - vroeger omzetbelasting - is ooit ontstaan om geld te genereren voor de kosten van een oorlog of het bestrijden van een crisis. Rijk en arm betalen evenveel, terwijl hun belangen hierbij enorm verschillen. De BTW drukt relatief zwaar op de lagere- en middeninkomens (de Engelcurve). De inkomsten- en vennootschapsbelasting zijn rechtvaardiger. De progress…	"ABOLITION OF VAT (in steps) VAT - formerly sales tax - was created to generate money for the costs of a war or to combat a crisis. Rich and poor pay equally, while their interests differ enormously. VAT weighs relatively heavily on lower and middle incomes (the Engel curve). Income and corporate taxes are fairer. The progressiveness in these taxes is not as great as it seems. The high percentage…	On behalf of the REFIT Platform, thank you for submitting your suggestion. The Platform has considered your suggestion and forwarded it to the Commission service responsible for the relevant policy area, which you will find attached to this e-mail. The REFIT Platform will not prepare an opinion on the issue raised because it does not identify actions for increasing efficiency of existing EU regul…	On behalf of the REFIT Platform, thank you for submitting your suggestion. The Platform has considered your suggestion and forwarded it to the Commission service responsible for the relevant policy area, which you will find attached to this e-mail. The REFIT Platform will not prepare an opinion on the issue raised because it does not identify actions for increasing efficiency of existing EU regul…	Evidence	1	Reduce	1	1	Competence	DE	0.795071	0.0113326	0.155425	0.00690911	0.0024554	0.011087	0.005632	0.0120873
e361	Y2017	2017-05-31	EU citizen	Citizen	Poland	Dear Sir or Madam, I have to suggestions: 1. The next step for business is to avoid situations, where a great corporation avoids paying taxes. Like for an example TESCO in Poland avoids paying taxes because the name TESCO is not Polish, so they pay themselves for using the brand to Ireland as far as I know. This can be aliminated in two ways: a) by a regulation, that if the international law says…	Dear Sir or Madam, I have to suggestions: 1. The next step for business is to avoid situations, where a great corporation avoids paying taxes. Like for an example TESCO in Poland avoids paying taxes because the name TESCO is not Polish, so they pay themselves for using the brand to Ireland as far as I know. This can be aliminated in two ways: a) by a regulation, that if the international law says…	Thank you for your message to the website 'Lighten the load – Have your say'. This website is dedicated to collect views on how to make EU laws more effective and efficient, to identify actions for simplification and reduction of regulatory burden. A To find out how Europe and its institutions are working, we recommend you contact the Commission's Europe Direct Service, which has been designed to…	Thank you for your message to the website 'Lighten the load – Have your say'. This website is dedicated to collect views on how to make EU laws more effective and efficient, to identify actions for simplification and reduction of regulatory burden. A To find out how Europe and its institutions are working, we recommend you contact the Commission's Europe Direct Service, which has been designed to…	Evidence	1	Increase	0	1	Procedural	EN	0.23743	0.0546433	0.290467	0.098461	0.123208	0.127565	0.0302835	0.037942
e362	Y2017	2017-06-01	Company/business org	Business	Czechia	Hi there, I would really be surprised if you would take this into consideration, but I doubt that is the case. Lighten the load should really mean that, lighten the load. To open a business as a sole trader - an starting entrepreneur is almost impossible without: - decent ammount of capital - 3rd party professional services to cover: translations, accounting, tax help and such. This is extremely …	Hi there, I would really be surprised if you would take this into consideration, but I doubt that is the case. Lighten the load should really mean that, lighten the load. To open a business as a sole trader - an starting entrepreneur is almost impossible without: - decent ammount of capital - 3rd party professional services to cover: translations, accounting, tax help and such. This is extremely …	replied by DG TAXUD ON 18/05/2018 SEE ATTACHED	replied by DG TAXUD ON 18/05/2018 SEE ATTACHED	Evidence	1	Reduce	1	1	Procedural	EN	0.273313	0.0116569	0.00920665	0.0874784	0.00968966	0.0734047	0.0838629	0.451388
e365	Y2017	2017-06-09	NGO	Non-business org	Netherlands	Met betrekking tot het European Solidarity Corps Initiative willen we graag het volgende inbrengen. Als EAPN NL kunnen we een dergelijk initiatief alleen maar ondersteunen. Prima! Toch willen we ook een paar zaken aan u meegeven bij de vaststelling. 1. Natuurlijk zullen jongeren via dergelijke acties nieuwe vaardigheden ontwikkelen of bestaande kunnen uitbouwen. Dat is mooi meegenomen, zonder dat…	With regard to the European Solidarity Corps Initiative, we would like to contribute the following. As EAPN NL we can only support such an initiative. Fine! Nevertheless, we would also like to give you a few things when determining. 1. Of course, through such actions young people will be able to develop new skills or build on existing ones. That is a nice bonus, without however having to be direc…	Thank you for your message to the Better Regulation Portal “lighten the load – have your say”. This website is dedicated to collect views on how to make EU laws more effective and efficient, to identify actions for simplification and reduction of regulatory burden. To find out how Europe and its institutions are working, we recommend you contact the Commission's Europe Direct Service, which has b…	Thank you for your message to the Better Regulation Portal “lighten the load – have your say”. This website is dedicated to collect views on how to make EU laws more effective and efficient, to identify actions for simplification and reduction of regulatory burden. To find out how Europe and its institutions are working, we recommend you contact the Commission's Europe Direct Service, which has b…	Evidence	1	Increase	0	1	Competence	NL	0.0083357	0.0148458	0.151246	0.00913291	0.0277288	0.0121873	0.227054	0.549469
e366	Y2017	2017-06-09	NGO	Non-business org	Slovakia	Vážení predstavitelia inštitúcií EÚ, dovoľujeme si Vás osloviť a požiadať Vás o zváženie nášho návrhu v oblasti zosúladenia pravidiel systému Eurokľúč v prostredí EÚ, ktorý pochádza z Nemecka patentom z roku 1986, je rozšírený v celej Európe a je určený pre zdravotne postihnutých občanov krajín EÚ. Bližšie informácie k súčasnému stavu na Slovensku s príkladmi iných krajín EÚ môžeme dodať po vašej…	Dear representatives of the EU institutions, we would like to address you and ask you to consider our proposal for the harmonization of the rules of the Eurokkey system in the EU environment, which comes from Germany with a 1986 patent, is widespread throughout Europe and is intended for disabled EU citizens. We can provide more detailed information on the current situation in Slovakia with examp…	děkujeme Vám za zprávu, kterou jste zanechali na internetové stránce „Váš názor na snižování zátěže“. Cílem této stránky je sbírat názory na to, jak by právní předpisy EU mohly být účinnější a účelnější, a zjišťovat, co by vedlo ke zjednodušení a snížení regulační zátěže. Pokud se zajímáte, jak Evropa a její institucí fungují, doporučujeme obrátit se na službu Evropské komise „Europe Direct“, kte…	"Thank you for the report you left on the" Your views on reducing burdens "website. The aim of this page is to gather views on how EU legislation could be more effective and efficient and to identify what would lead to simplification and reduction. regulatory loads. If you are interested in how Europe and its institutions work, we recommend that you contact the European Commission's 'Europe Direc…	Evidence	1	Harmonization	0	1	Competence	CZ	0.0112443	0.0157897	0.0205877	0.56859	0.00900697	0.193382	0.0390557	0.142343
e367	Y2017	2017-06-09	NGO	Non-business org	Slovakia	Vážené inštitúcie EÚ, dovoľujeme si Vás osloviť a požiadať Vás o zváženie nášho návrhu, ktorého cieľom je vytvorenie systému cezhraničnej zdravotnej starostlivosti garantovaného nariadeniami EÚ v tom duchu, aby boli vytvorené pravidla záväzné pre členské krajiny EÚ tak, aby v prípade nevyhnutnej zdravotnej starostlivosti pacient nemusel doplácať v zmysle súčasných nariadení a navrhujeme do Smerni…	Dear EU institutions, We would like to address you and ask you to consider our proposal, which aims to create a cross-border healthcare system guaranteed by EU regulations in the spirit of creating rules binding on EU member states so that in case of necessary healthcare the patient does not have to pay extra according to current regulations and we propose to the EP and Council Directive c. 24/20…	On behalf of the REFIT Platform, thank you for submitting your suggestion. The Platform has considered your suggestion and decided that it will not prepare an opinion because with regard to your request to establish a cross-border healthcare scheme, in line with article 168(7) of the Treaty on the Functioning of the EU (TFEU), the EU has no competence in deciding for the Member States on the orga…	On behalf of the REFIT Platform, thank you for submitting your suggestion. The Platform has considered your suggestion and decided that it will not prepare an opinion because with regard to your request to establish a cross-border healthcare scheme, in line with article 168(7) of the Treaty on the Functioning of the EU (TFEU), the EU has no competence in deciding for the Member States on the orga…	Evidence	1	Harmonization	0	1	Competence	SK	0.121121	0.0144635	0.00837306	0.784026	0.00984616	0.0381423	0.0129237	0.0111039
e368	Y2017	2017-06-09	NGO	Non-business org	Slovakia	Vážené inštitúcie EÚ, dovoľujeme si Vás osloviť a podať návrh na zrušenie výnimky pre Slovenskú republiku v oblasti odstraňovania barié a výstavby bezbariérových budov a priestranstiev. Pri vytváraní tejto výnimky bolo hlavným dôvodom nedostatočná legislatíva SR v podobe tzv. stavebného zákona. Predložili sme v rámci národného prostredia návrh na jeho novelu, kde druhým krokom by malo byť zrušeni…	Dear EU institutions, We would like to address you and submit a proposal for the abolition of the exemption for the Slovak Republic in the area of removal of barriers and construction of barrier-free buildings and premises. When creating this exception, the main reason was the insufficient legislation of the Slovak Republic in the form of the so-called of the Building Act. We have submitted a pro…	Dobrý den Kucera, děkujeme Vám za zprávu, kterou jste zanechali na internetové stránce „Váš názor na snižování zátěže“. Cílem této stránky je sbírat názory na to, jak by právní předpisy EU mohly být účinnější a účelnější, a zjišťovat, co by vedlo ke zjednodušení a snížení regulační zátěže. Pokud se zajímáte, jak Evropa a její institucí fungují, doporučujeme obrátit se na službu Evropské komise „E…	"Hello Kucera, Thank you for the message you left on the "Your views on burden reduction" website. The aim of this site is to gather views on how EU legislation could be more effective and efficient and to identify what would lead to simplification and reduction of the regulatory burden. If you are interested in how Europe and its institutions work, we recommend that you contact the European Comm…	Evidence	1	Reduce	1	1	Competence	SK	0.0077983	0.0140052	0.00516423	0.929809	0.014382	0.0126925	0.0090729	0.00707564
e369	Y2017	2017-06-09	NGO	Non-business org	Slovakia	Vážené inštitúcie EÚ, dovoľujeme si Vás osloviť a požiadať Vás o zahájenie rokovania s národným prostredím Slovenskej republiky a vytvoriť Národný kontaktný bod k programu EÚ CALYPSO, kde Slovensko zatiaľ nie je členom. Tento program podporovaného turizmu pre znevýhodnené skupiny obyvateľov krajín EÚ súvisí dopadovo s rozvojom cestovného ruchu, regionálnym rozvojom a rozvojom sociálnych služieb n…	Dear EU institutions, We would like to address you and ask you to start negotiations with the national environment of the Slovak Republic and create a National Contact Point for the EU program CALYPSO, where Slovakia is not yet a member. This program of supported tourism for disadvantaged groups of the population of EU countries is related to the development of tourism, regional development and d…	děkujeme Vám za zprávu, kterou jste zanechali na internetové stránce „Váš názor na snižování zátěže“. Cílem této stránky je sbírat názory na to, jak by právní předpisy EU mohly být účinnější a účelnější, a zjišťovat, co by vedlo ke zjednodušení a snížení regulační zátěže. Pokud se zajímáte, jak Evropa a její institucí fungují, doporučujeme obrátit se na službu Evropské komise „Europe Direct“, kte…	"Thank you for the report you left on the" Your views on reducing burdens "website. The aim of this page is to gather views on how EU legislation could be more effective and efficient and to identify what would lead to simplification and reduction. regulatory loads. If you are interested in how Europe and its institutions work, we recommend that you contact the European Commission's 'Europe Direc…	Evidence	1	Increase	0	1	Competence	SK	0.0105417	0.032455	0.0220249	0.506979	0.012142	0.342202	0.0413213	0.0323342
e370	Y2017	2017-07-07	Business association	Business	Belgium	I am working with DIGITALEUROPE, the voice of the European digital industries. We understand that within the REFIT Stakeholder Platform there was raised the issue of considering REFIT exercise related to the private copying exception defined in Article 5.2 (b) of the Directive 2001/29/EC of the European Parliament and of the Council of 22 May 2001 on the harmonisation of certain aspects of copyri…	I am working with DIGITALEUROPE, the voice of the European digital industries. We understand that within the REFIT Stakeholder Platform there was raised the issue of considering REFIT exercise related to the private copying exception defined in Article 5.2 (b) of the Directive 2001/29/EC of the European Parliament and of the Council of 22 May 2001 on the harmonisation of certain aspects of copyri…	On behalf of the REFIT Platform, thank you for submitting your suggestion on copyright levies. As you can see from the REFIT Platform website (https://ec.europa.eu/info/files/refit-platform-work-progress-communicati...) a submission on the copyright levy system has indeed been received in the past (Ref IV.3.a) and it is planned that work will now start on the issues raised by this submission. If …	On behalf of the REFIT Platform, thank you for submitting your suggestion on copyright levies. As you can see from the REFIT Platform website (https://ec.europa.eu/info/files/refit-platform-work-progress-communicati...) a submission on the copyright levy system has indeed been received in the past (Ref IV.3.a) and it is planned that work will now start on the issues raised by this submission. If …	Evidence	1	Harmonization	0	1	Procedural	EN	0.0664182	0.486193	0.0103744	0.0897908	0.106717	0.10396	0.126199	0.0103471
e371	Y2017	2017-07-25	Business association	Business	Germany	German listed companies are concerned about burdensome regulation as regards the preparing and filing annual financial reports. According to Art. 4(7) of the revised EU Transparency Directive (TD, 2013/50/EU) European listed companies will have to file their annual financial reports in a single electronic reporting format (ESEF) with effect from 1 January 2020. Details will be specified by Regula…	German listed companies are concerned about burdensome regulation as regards the preparing and filing annual financial reports. According to Art. 4(7) of the revised EU Transparency Directive (TD, 2013/50/EU) European listed companies will have to file their annual financial reports in a single electronic reporting format (ESEF) with effect from 1 January 2020. Details will be specified by Regula…	On behalf of the REFIT Platform, thank you for submitting your suggestion on the efficiency, effectiveness or burden reduction of EU regulation or its implementation by Member States. The Platform has concluded that it does not intend to prepare an opinion on the issues raised, because they are not related to existing EU legislation. As indicated in the reply issued by DG FISMA, the legislation r…	On behalf of the REFIT Platform, thank you for submitting your suggestion on the efficiency, effectiveness or burden reduction of EU regulation or its implementation by Member States. The Platform has concluded that it does not intend to prepare an opinion on the issues raised, because they are not related to existing EU legislation. As indicated in the reply issued by DG FISMA, the legislation r…	Evidence	1	Increase	0	1	Procedural	EN	0.00711002	0.0115802	0.00256525	0.913809	0.0484398	0.00446	0.008245	0.00379093
e372	Y2017	2017-07-28	Company/business org	Business	Italy	For a SME company the paperwork and legal documents required for the EU project are massive. If a SME got a big company in a project partnership, the legal paperwork or requirements such as: modification of GA, amendment, IP protection, etc can really became problematic. And big company can force to accept their condition. Best regards. Simone	For a SME company the paperwork and legal documents required for the EU project are massive. If a SME got a big company in a project partnership, the legal paperwork or requirements such as: modification of GA, amendment, IP protection, etc can really became problematic. And big company can force to accept their condition. Best regards. Simone	REPLY 9.10.2017: Your concern does not directly concern the effectiveness of existing EU legislation and therefore falls outside of the mandate of the REFIT Platform. We have, however, transmitted your suggestion to the concerned services, to the Directorate-General for Research and Innovation (DG RTD) and to the Research Executive Agency (REA), and will forward you their reply once received. ***…	REPLY 9.10.2017: Your concern does not directly concern the effectiveness of existing EU legislation and therefore falls outside of the mandate of the REFIT Platform. We have, however, transmitted your suggestion to the concerned services, to the Directorate-General for Research and Innovation (DG RTD) and to the Research Executive Agency (REA), and will forward you their reply once received. ***…	Evidence	1	Reduce	1	1	Competence	EN	0.0869034	0.0731008	0.0226557	0.20626	0.149961	0.0697755	0.282516	0.108828
e373	Y2017	2017-08-04	EU citizen	Citizen	Spain	Buenas tardes, Muchas gracias por permitir expresar mis ideas. Una solucion que permitiria mejorar el aire que respiramos es subvencionar los coches electricos. La forma mas facil seria incrementar un centimo o dos, tanto en el combustible de los automoviles como en el de los aviones, pues estos ultimos ha crecido mucho los ultimos años. Asi, usamos la logica, el que contamina paga. Creo que el c…	Good afternoon, Thank you very much for allowing to express my ideas. A solution that would improve the air we breathe is to subsidize electric cars. The easiest way would be to increase a cent or two, both in fuel for cars and for airplanes, since the latter has grown a lot in recent years. Thus, we use logic, the polluter pays. I think climate change is getting out of control, so something need…	Estimado señor/Estimada señora, Le agradezco su mensaje a la página web «Lighten the Load — Have Your Say» («Aligere la carga – Diga lo que piensa»). Esta página tiene por objeto recoger opiniones sobre la manera de hacer que la legislación de la UE sea más eficaz y eficiente, a fin de concretar medidas de simplificación y reducción de la carga normativa. Para saber cómo funcionan Europa y sus in…	"Dear Sir / Dear Madam, I appreciate her posting to the "Lighten the Load - Have Your Say" website. The purpose of this page is to collect opinions on how to make EU legislation more effective and efficient, in order to specify measures to simplify and reduce the regulatory burden. To find out how Europe and its institutions work, we recommend that you contact the Commission's Europe Direct servi…	Evidence	1	Increase	0	1	Competence	ES	0.0685173	0.112937	0.0219393	0.010573	0.0123697	0.0208895	0.0300566	0.722718
e374	Y2017	2017-09-23	EU citizen	Citizen	Spain	national court should be able to ask european human rights court about european human rights, the same way it has the chance to do about the rest of european law by asking the european justice court. it should be more important to make sure national law is not against european human rights, than to do that for the rest of european law, as long as human rights are more important for citizens than …	national court should be able to ask european human rights court about european human rights, the same way it has the chance to do about the rest of european law by asking the european justice court. it should be more important to make sure national law is not against european human rights, than to do that for the rest of european law, as long as human rights are more important for citizens than …	Le agradezco su mensaje a la página web «Lighten the Load — Have Your Say» («Aligere la carga – Diga lo que piensa»). Esta página tiene por objeto recoger opiniones sobre la manera de hacer que la legislación de la UE sea más eficaz y eficiente, a fin de concretar medidas de simplificación y reducción de la carga normativa. Para saber cómo funcionan Europa y sus instituciones, le recomendamos que…	"Thank you for your message on the 'Lighten the Load - Have Your Say' website. This page is intended to collect opinions on how to make EU law relevant. more effective and efficient, in order to specify measures to simplify and reduce the regulatory burden. To find out how Europe and its institutions work, we recommend that you contact the Commission's Europe Direct service, whose purpose is to a…	Opinion	0	Increase	0	1	Competence	EN	0.00428682	0.00732575	0.00817853	0.00621065	0.00222197	0.940502	0.0106027	0.0206714
e376	Y2017	2017-10-16	Business association	Business	Belgium	Please find attached Insurance Europe’s contribution to the European Commission’s initiative for better regulation, the REFIT Platform. Insurance Europe’s contribution aims, within the European Commission’s framework for better regulation, at making EU regulation more efficient and effective while reducing burden and maintaining policy objectives. Insurance Europe’s input concerns (i) information…	Please find attached Insurance Europe’s contribution to the European Commission’s initiative for better regulation, the REFIT Platform. Insurance Europe’s contribution aims, within the European Commission’s framework for better regulation, at making EU regulation more efficient and effective while reducing burden and maintaining policy objectives. Insurance Europe’s input concerns (i) information…	Reply from European Commission on 30 May 2018: The next Platform meeting is scheduled for Friday 29 June 2018. In terms of the follow-up of Refit opinions, the Commission takes all opinions duly into account when preparing the following Commission work-program and of course focuses on issues raised by the platform in the framework of fitness checks and evaluations. Among the potential follow up a…	Reply from European Commission on 30 May 2018: The next Platform meeting is scheduled for Friday 29 June 2018. In terms of the follow-up of Refit opinions, the Commission takes all opinions duly into account when preparing the following Commission work-program and of course focuses on issues raised by the platform in the framework of fitness checks and evaluations. Among the potential follow up a…	Evidence	1	Reduce	1	1	Adoption	EN	0.471831	0.438952	0.00417437	0.0314871	0.025976	0.00562743	0.00729066	0.0146617
e377	Y2017	2017-10-23	EU citizen	Citizen	France	Regarding Subscriptions to internet providers in the EU. Most ISP's in Europe and abroad have their prices displayed as "internet up to 100mbps for 40E/month" (example). The term "up to" means absolutely nothing. An ISP can provide real speeds of 5mbps and still technically fulfil it's promise since the speed is below 100mbps. I have noticed this issue in Romania (<60% of advertised speed - INES)…	Regarding Subscriptions to internet providers in the EU. Most ISP's in Europe and abroad have their prices displayed as "internet up to 100mbps for 40E/month" (example). The term "up to" means absolutely nothing. An ISP can provide real speeds of 5mbps and still technically fulfil it's promise since the speed is below 100mbps. I have noticed this issue in Romania (<60% of advertised speed - INES)…	Please find below the links to the Regulation: http://eur-lex.europa.eu/legal-content/en/TXT/?uri=CELEX%3A32015R2120 and the BEREC guidelines: http://berec.europa.eu/eng/netneutrality/ 8 November 2017 Dear Sir, Thank you for your submission to Lighten the Load – Have your Say in which you suggest that a European rule is established to set a minimum speed that must be obtained by the client of an …	Please find below the links to the Regulation: http://eur-lex.europa.eu/legal-content/en/TXT/?uri=CELEX%3A32015R2120 and the BEREC guidelines: http://berec.europa.eu/eng/netneutrality/ 8 November 2017 Dear Sir, Thank you for your submission to Lighten the Load – Have your Say in which you suggest that a European rule is established to set a minimum speed that must be obtained by the client of an …	Evidence	1	Increase	0	1	Policy substantive	EN	0.359288	0.0139485	0.0616095	0.0079665	0.00456101	0.126	0.394793	0.0318336
e378	Y2017	2017-10-25	NGO	Non-business org	Ireland	The Pet Passport scheme, while laudable and well intended, has caused considerable difficulties in several aspects of operation. The aspect that concerns me most is the classification of rescue dogs as "commercial" - due to a change of ownership status when being exported. I understand there are several legal/technical reasons for this but it is causing a huge additional administrative and financ…	The Pet Passport scheme, while laudable and well intended, has caused considerable difficulties in several aspects of operation. The aspect that concerns me most is the classification of rescue dogs as "commercial" - due to a change of ownership status when being exported. I understand there are several legal/technical reasons for this but it is causing a huge additional administrative and financ…			Evidence	1	Reduce	1	0		EN	0.00315575	0.928283	0.00376316	0.00246595	0.00728677	0.00400334	0.00418669	0.0468556
e379	Y2018	2018-01-12	EU citizen	Citizen	Bulgaria	На всяко местно физическо лице при подаване на годишната данъчна декларация, да се връщат 3 % върху основата на разходите, срещу представяне на фискални бонове за извършените покупки през изминалата данъчна година. Чисто математически, това би струвало на държавата /България/ около 1,32 млрд. лв, но след приспадане на потреблението на транзитно преминаващите лица през територията на страната, вре…	To each local natural person when submitting the annual tax return, to be reimbursed 3% on the basis of expenses, against presentation of fiscal vouchers for the purchases made during the past tax year. Purely mathematically, this would cost the state / Bulgaria / about BGN 1.32 billion, but after deducting the consumption of persons transiting through the country, temporary residents for less th…	Thank you for your interest in the REFIT Platform and your submissions BRP S159296 and 159894 on Wages. We have read your query with interest and contacted the relevant European Commission Services in Directorates General for Employment and Taxation and who have assessed your request. We are afraid the REFIT Platform will not be able to issue an opinion on your suggestion as it does not relate to…	Thank you for your interest in the REFIT Platform and your submissions BRP S159296 and 159894 on Wages. We have read your query with interest and contacted the relevant European Commission Services in Directorates General for Employment and Taxation and who have assessed your request. We are afraid the REFIT Platform will not be able to issue an opinion on your suggestion as it does not relate to…	Evidence	1	Increase	0	1	Competence	BG	0.97788	0.00566931	0.00142718	0.00342138	0.00252942	0.00286531	0.0022451	0.00396191
e380	Y2018	43114	EU citizen	Citizen	Bulgaria	When every local individual fills out their yearly taxes, 3% to be returned based on their spendings, after presenting receipts for all purchases during the past year. Simply mathematically this will cost the state (Bulgaria) about 1.32 billion BGN, but after deducting the spendings of transiting foreigners through the country, temporary residents that reside less than 183 days per year and also …	When every local individual fills out their yearly taxes, 3% to be returned based on their spendings, after presenting receipts for all purchases during the past year. Simply mathematically this will cost the state (Bulgaria) about 1.32 billion BGN, but after deducting the spendings of transiting foreigners through the country, temporary residents that reside less than 183 days per year and also …	Thank you for your interest in the REFIT Platform and your submissions BRP S159296 and 159894 on Wages. We have read your query with interest and contacted the relevant European Commission Services in Directorates General for Employment and Taxation and who have assessed your request. We are afraid the REFIT Platform will not be able to issue an opinion on your suggestion as it does not relate to…	Thank you for your interest in the REFIT Platform and your submissions BRP S159296 and 159894 on Wages. We have read your query with interest and contacted the relevant European Commission Services in Directorates General for Employment and Taxation and who have assessed your request. We are afraid the REFIT Platform will not be able to issue an opinion on your suggestion as it does not relate to…	Evidence	1	Increase	0	1	Competence	EN	0.982273	0.00316743	0.00123766	0.00233271	0.00161534	0.00278679	0.00214205	0.00444478
e381	Y2018	2018-01-15	Company/business org	Business	Italy	Accordingly to Article 65.1 of Regulation 883/04, a person who is partially or intermittently unemployed make himself/herself available to the employment services of the Member State where he/she was fully employed last, receiving benefits in accordance with that Member State legislation as if he/she were residing there; in such a specific case, the general criteria that it is up to the Member St…	Accordingly to Article 65.1 of Regulation 883/04, a person who is partially or intermittently unemployed make himself/herself available to the employment services of the Member State where he/she was fully employed last, receiving benefits in accordance with that Member State legislation as if he/she were residing there; in such a specific case, the general criteria that it is up to the Member St…	Thank you for your interest in the REFIT Platform and your submission BRP S159911 on Unemployment allowance. We have read your query related to interpretation of provisions of Regulation (EC) No 883/2004 with interest. We have contacted the relevant European Commission Services in Directorate General for Employment who have assessed your request. First of all, it should be noted that, EU law in t…	Thank you for your interest in the REFIT Platform and your submission BRP S159911 on Unemployment allowance. We have read your query related to interpretation of provisions of Regulation (EC) No 883/2004 with interest. We have contacted the relevant European Commission Services in Directorate General for Employment who have assessed your request. First of all, it should be noted that, EU law in t…	Evidence	1	Reduce	1	1	Policy substantive	EN	0.960245	0.0048297	0.00220245	0.00426761	0.00265249	0.00792106	0.00396309	0.0139186
e382	Y2018	2018-01-17	EU citizen	Citizen	Netherlands	Dit voorstel heeft betrekking op de invoer van sigaretten door particulieren voor eigen gebruik vanuit een niet-EU land naar de EU. In dit geval Samnaun (CH)-dutyfree naar AT(Oostenrijk). Kennelijk zijn er nu geen uitzonderingen mogelijk op de maximum hoeveelheid en toeslag voor invoerrechten, accijns en btw. Dit heeft ernstige gevolgen voor sommige EU burgers omdat zij in feite gedwongen worden …	This proposal concerns the import of cigarettes by private individuals for their own use from a non-EU country to the EU. In this case Samnaun (CH) -dutyfree to AT (Austria). Apparently there are no exceptions to the maximum quantity and surcharge for import duties, excise duties and VAT. This has serious consequences for some EU citizens because they are in fact forced to smuggle or pay a much t…	Thank you for your interest in the REFIT Platform and your submission in the Better Regulation portal via the website 'Lighten the load – Have your say' with reference S160908. This website is dedicated to collect views on how to make EU laws more effective and efficient as well as to identify actions for simplification and reduction of regulatory burden. We are however sorry to state that your s…	Thank you for your interest in the REFIT Platform and your submission in the Better Regulation portal via the website 'Lighten the load – Have your say' with reference S160908. This website is dedicated to collect views on how to make EU laws more effective and efficient as well as to identify actions for simplification and reduction of regulatory burden. We are however sorry to state that your s…	Evidence	1	Reduce	1	1	Competence	NL	0.142127	0.0133905	0.0138059	0.0521584	0.00858922	0.0729245	0.653573	0.0434309
e383	Y2018	2018-01-31	EU citizen	Citizen	Romania	Stimată doamnă, stimat domn, Încep prin a vă mulțumi pentru posibilitatea oferită de a participa la activitatea dumneavoastră și de a îmi face opinia auzită. Sunt cetățean român și aflu zilnic despre abuzurile puterii politice și administrative din România, atât la nivel național cât și la nivel local. După eforturile depuse în anii dinainte de 2007 pentru a demonstra că România se ridică la stan…	Dear Madam, Dear Sir, I begin by thanking you for the opportunity to participate in your work and to give my opinion. I am a Romanian citizen and I find out daily about the abuses of political and administrative power in Romania, both nationally and locally. After the efforts made in the years before 2007 to prove that Romania rises to the EU standards, in the following years most of the reforms …	Vă mulțumim pentru mesajul adresat pe site-ul web „Reduceți efortul - Exprimați-vă părerea!”. Acest site web este dedicat colectării opiniilor dumneavoastră despre cum considerați că ar putea fi sporită eficiența și eficacitatea legislației UE, în scopul identificării acțiunilor de simplificare și reducere a sarcinii de reglementare. Pentru mai multe informații privind modul de funcționare a Uniu…	"Thank you for the message on the 'Reduce Effort - Express Your Opinion!' and reducing the regulatory burden. For more information on how the European Union and its institutions work, we recommend that you contact the Commission's Europe Direct service, which was set up to answer your questions about the EU and its policies. In this regard, we invite you to consult the website http://europa.eu/co…	Evidence	1	Harmonization	0	1	Competence	RO	0.00255784	0.00592244	0.110626	0.00408221	0.000961683	0.846216	0.00709813	0.0225358
e384	Y2018	2018-02-02	Non-EU citizen	Citizen	Ukraine	Suggestion: Need for more character spaces on your online form - as attachments are too large if pdf form, also if docx and rtf are unsupported document attachments so no way to know whether they got through - unless emailed behind scenes. Perhaps an email address link would be just as useful as an online form. Just saying - HRA freedom of expression includes capture of information. Hour Estimati…	Suggestion: Need for more character spaces on your online form - as attachments are too large if pdf form, also if docx and rtf are unsupported document attachments so no way to know whether they got through - unless emailed behind scenes. Perhaps an email address link would be just as useful as an online form. Just saying - HRA freedom of expression includes capture of information. Hour Estimati…	Dear Madam, Thank you for your submission to the Better Regulation Portal (lighten the load) with reference S169275. We understand you wish to upload different attachments and you are in need of more space in the suggestion box. Please feel free to send more than one submission through the database but please take into account that your attachments or files provided do not exceed 5 MB each time y…	Dear Madam, Thank you for your submission to the Better Regulation Portal (lighten the load) with reference S169275. We understand you wish to upload different attachments and you are in need of more space in the suggestion box. Please feel free to send more than one submission through the database but please take into account that your attachments or files provided do not exceed 5 MB each time y…	Opinion	0	Neutral	0	1	Procedural	EN	0.00812337	0.0200804	0.798965	0.11342	0.00638893	0.019425	0.0149097	0.0186871
e385	Y2018	2018-02-21	Business association	Business	Belgium	Regulatory fitness check of Smoke Flavouring Regulation (EC) No 2065/2003 and its implementing measures “Lighten the Load – Have your say” CleanSmokeCoalition answering as a business association Based in all EU Member States Sector commented on is No 15: Environment, consumers and health protection Please give a full description of the problem Regulation (EC) No 2065/2003 (smoke flavourings) has …	Regulatory fitness check of Smoke Flavouring Regulation (EC) No 2065/2003 and its implementing measures “Lighten the Load – Have your say” CleanSmokeCoalition answering as a business association Based in all EU Member States Sector commented on is No 15: Environment, consumers and health protection Please give a full description of the problem Regulation (EC) No 2065/2003 (smoke flavourings) has …	Thank you for your submission via Lighten the Load and your interest in the REFIT Platform. The Platform has considered your suggestion and decided that it will not prepare an opinion because it does not identify actions for increasing efficiency or effectiveness, nor on burden reduction of EU regulation or its implementation by Member States. Your suggestion has nonetheless been forwarded to the…	Thank you for your submission via Lighten the Load and your interest in the REFIT Platform. The Platform has considered your suggestion and decided that it will not prepare an opinion because it does not identify actions for increasing efficiency or effectiveness, nor on burden reduction of EU regulation or its implementation by Member States. Your suggestion has nonetheless been forwarded to the…	Evidence	1	Reduce	1	1	Competence	EN	0.0068186	0.224182	0.00720285	0.64739	0.096834	0.00442295	0.00853776	0.00461221
e386	Y2018	2018-03-07	Company/business org	Business	Germany	WEEE (2012/19/EU): EU-Bürokratie verhindert den von ihr gewünschten freien europaweiten Onlinehandel Viele gut gemeinte Ansätze innerhalb der EU werden durch überbordende Regelungen konterkariert. Dies gilt insbesondere bei der Umsetzung der WEEE-Richtlinie durch kleine und mittelständische Onlinehändler, die sich dadurch im harten Wettbewerb gegen konkurrierende Konzerne stark benachteiligt fühl…	"WEEE (2012/19 / EU): EU bureaucracy prevents the free Europe-wide online trade that it wants Many well-intentioned approaches within the EU are thwarted by excessive regulations. This applies in particular to the implementation of the WEEE directive by small and medium-sized online retailers, who feel that they are severely disadvantaged in the tough competition against competing corporations. T…			Evidence	1	Reduce	1	0		DE	0.97452	0.00523994	0.00166188	0.00318052	0.00259399	0.00393389	0.00291938	0.00595053
e387	Y2018	2018-03-09	EU citizen	Citizen	Germany	WEEE (2012/19/EU), Packaging Waste (94/62/EC), Batteriedirektive (2013/56/EU) drängen in der jetzigen Form kleine und mittlere Unternehmen in die Illegalität. Das CE-Zeichen soll den freien Warenverkehr innerhalb der EU ermöglichen. Die oben genannten Direktiven behindern diesen aber stark, kleine und mittlere Unternehmen werden dadurch in die Illegalität gedrängt. Zweifelsohne sind diese drei EU…	WEEE (2012/19 / EU), Packaging Waste (94/62 / EC), Battery Directive (2013/56 / EU) in their current form are pushing small and medium-sized companies into illegality. The CE mark is intended to enable the free movement of goods within the EU. The above-mentioned directives hinder this, however, and small and medium-sized companies are thereby forced into illegality. Without a doubt, these three …			Evidence	1	Harmonization	0	0		DE	0.98558	0.00270995	0.00091918	0.00229016	0.00158911	0.00244638	0.00190274	0.00256287
e388	Y2018	2018-03-11	EU citizen	Citizen	Finland	Basic traffic laws: There are different interpretations of basic light signals in road laws. When speaking about traffic lights, if there is additional green light with arrow to the right, in Finland it means you dont have to be careful of cars or pedestrians if turning right, but in Poland, you must look out for possible pedestrians which may be crossing the street on the right. Image of lights …	Basic traffic laws: There are different interpretations of basic light signals in road laws. When speaking about traffic lights, if there is additional green light with arrow to the right, in Finland it means you dont have to be careful of cars or pedestrians if turning right, but in Poland, you must look out for possible pedestrians which may be crossing the street on the right. Image of lights …	Thank you for your message to the Better Regulation Portal “lighten the load – have your say”. This website is dedicated to collect views on how to make EU laws more effective and efficient, to identify actions for simplification and reduction of regulatory burden. Unfortunately your submissions falls outside the remits of the REFIT Platform, as there is no specific EU legislation on this subject…	Thank you for your message to the Better Regulation Portal “lighten the load – have your say”. This website is dedicated to collect views on how to make EU laws more effective and efficient, to identify actions for simplification and reduction of regulatory burden. Unfortunately your submissions falls outside the remits of the REFIT Platform, as there is no specific EU legislation on this subject…	Opinion	0	Harmonization	0	1	Competence	EN	0.00752448	0.0117118	0.0098801	0.0405974	0.00519176	0.886479	0.0176587	0.0209572
e389	Y2018	2018-03-15	EU citizen	Citizen	Germany	Anerkennung Internationaler Organisationen durch die Europäische Union! Ein Beispiel: In den Jahren 2015 bis 2018 war ich über das Auswärtige Amt der Bundesrepublik Deutschland zur OSZE und von dieser in die Ukraine nach Donestk sekundiert. Hierfür erhielt ich vom Auswärtigen Amt und von der OSZE eine Aufwandsentschädigung. Nun meldet sich das Deutsche Finanzamt bei mir und verlangt den Anteil de…	Recognition of international organizations by the European Union! An example: In the years 2015 to 2018, I was seconded to the OSCE via the Foreign Office of the Federal Republic of Germany and from there to the Ukraine in Donestk. For this I received an allowance from the Foreign Office and the OSCE. Now the German tax office gets in touch with me and demands that the part of the expense allowan…	Haben Sie vielen Dank für Ihre Nachricht und Interesse in der REFIT Platform. Die REFIT Plattform hat Ihren Vorschlag geprüft und beschlossen, dass sie keine Stellungnahme verfassen wird, weil er weder Maßnahmen zur Steigerung der Effizienz oder Wirksamkeit noch zur Verringerung der Belastung der EU-Verordnung oder ihrer Umsetzung durch die Mitgliedstaaten betrifft. Ihr Vorschlag wurde stattdesse…	Thank you very much for your message and your interest in the REFIT Platform. The REFIT platform has examined your proposal and decided that it will not issue an opinion because it does not concern measures to increase efficiency or effectiveness, or to reduce the burden of the EU regulation or its implementation by the Member States. Instead, your proposal was forwarded to the Commission service…	Evidence	1	Increase	0	1	Policy substantive	DE	0.00871983	0.0113581	0.009141	0.4263	0.0200378	0.493211	0.0218756	0.00935732
e390	Y2018	2018-03-19	EU citizen	Citizen	Netherlands	As an EU citizen, I have been enjoying the benefits of being able to freely move around and work in many different EU membership states. A recurring (and expensive) issue is that of car ownership. Re-registration obligations and not insignificant fees make moving around with all your possessions that include a car and expensive and time consuming affair. I would like to see that the laws and regu…	Since the OSCE now, in the division of labor with other international organizations, includes early warning, conflict prevention and crisis management in international conflicts, and thus contributes to a new security structure for Europe and also acts as a framework for conventional arms control and confidence-building measures, the EU are -Member states according to the Treaty on European Union…	Dear submitter, Thank you for your interest in the REFIT Platform and your submission in the Better Regulation portal via the website 'Lighten the load – Have your say' with reference S195568, that we have read with interest. This website is dedicated to collect views on how to make EU laws more effective and efficient as well as to identify actions for simplification and reduction of regulatory …	Dear submitter, Thank you for your interest in the REFIT Platform and your submission in the Better Regulation portal via the website 'Lighten the load – Have your say' with reference S195568, that we have read with interest. This website is dedicated to collect views on how to make EU laws more effective and efficient as well as to identify actions for simplification and reduction of regulatory …	Evidence	1	Harmonization	0	1	Competence	EN	0.0103182	0.0156723	0.00929848	0.894245	0.015942	0.0211169	0.0197313	0.0136756
e391	Y2018	2018-03-23	Business association	Business	Germany	To: REFIT Platform Subject: Revision of 2001/83/EC, in particular article 10(5) – Data protection Article 10(5) of Directive 2001/83/EC stipulates the data protection period for new indications of proven active substances to a maximum of one year, provided clinical trials with the new indication have been conducted. The limited period of data protection of one year does not provide a strong incen…	It therefore seems possible that the OSCE should represent an international organization due to its tasks and international interdependencies. Such an organization should be included in a list of the international organizations of the member states of the EU. If this is such a leadership, since the fundamental problem can be of particular importance in connection with peace and equal treatment in…			Evidence	1	Increase	0	0		EN	0.0127063	0.0195861	0.0118526	0.719944	0.0152129	0.121869	0.078901	0.0199281
e394	Y2018	2018-04-06	Business association	Business	Germany	REFIT-Plattform Einsendung der deutschen Wirtschaftsverbände BDI & DIHK zur Wasserrahmenrichtlinie (Water Framework Directive) Die Situation: Die EU-Kommission hat im Oktober einen Fitness-Check zur Wasser-rahmen-Richtlinie (WRRL) (Water Framework Directive) eröffnet. Dazu soll der dringende Verbesserungsbedarf betont werden. Die Umsetzung der WRRL hat in Deutschland zu einer deutlichen Verbesser…	"REFIT platform submission by the German trade associations BDI & DIHK on the Water Framework Directive The situation: In October the EU Commission opened a fitness check on the Water Framework Directive (WFD). To this end, the urgent need for improvement should be emphasized. The implementation of the WFD has led to a significant improvement in the status of numerous bodies of water in Germany. …	3 July 2018. On behalf of the REFIT Platform, thank you for submitting your suggestion on the efficiency, effectiveness or burden reduction of EU regulation or its implementation by Member States. The Platform has concluded that it does not intend to prepare an opinion on the issues raised. This is because there is currently a Fitness check (REFIT evaluation) of the WFD underway. We would recomme…	3 July 2018. On behalf of the REFIT Platform, thank you for submitting your suggestion on the efficiency, effectiveness or burden reduction of EU regulation or its implementation by Member States. The Platform has concluded that it does not intend to prepare an opinion on the issues raised. This is because there is currently a Fitness check (REFIT evaluation) of the WFD underway. We would recomme…	Evidence	1	Reduce	1	1	Procedural	DE	0.00725658	0.865431	0.00272869	0.00677141	0.105193	0.00414111	0.00511129	0.00336713
e395	Y2018	2018-04-06	Business association	Business	Germany	REFIT-Plattform Einsendung der deutschen Wirtschaftsverbände BDI & DIHK zur Waste Electrical and Electronic Equipment 2 (WEEE2-) Richtlinie Die Situation: EU-Rat und EU-Parlament haben am 11.12.2017 Vorschläge zur Abfallverringerung und neue Quoten zum Abfallrecycling vereinbart. Das EU-Abfallpaket ist Teil des EU-Kreislaufwirtschaftspaket, das im Frühjahr 2018 in Kraft tritt. Zum Bemühen höherer…	REFIT platform submission of the German trade associations BDI & DIHK for the Waste Electrical and Electronic Equipment 2 (WEEE2-) guideline The situation: On December 11, 2017, the EU Council and the EU Parliament agreed on proposals to reduce waste and new quotas for waste recycling. The EU waste package is part of the EU circular economy package, which will come into force in spring 2018. The …			Evidence	1	Reduce	1	0		DE	0.866383	0.0648257	0.00276405	0.00639196	0.017343	0.0318718	0.00461923	0.00580156
e398	Y2018	2018-04-09	Business association	Business	Germany	REFIT-Plattform Einsendung der deutschen Wirtschaftsverbände BDI & DIHK zur EU-Lebensmittelinformationsverordnung (LMIV) Die Situation: Seit 13. Dezember 2014 gilt die LMIV EU 1169/2011 in ganz Europa. Ziel der Verordnung ist, Verbraucher über Allergene, Energie- und Nährwerte, sowie und die Herkunft von Lebensmitteln zu informieren. Aus verschiedenen Untersuchungen und Hinweisen aus der Praxis w…	REFIT platform submission by the German trade associations BDI & DIHK on the EU Food Information Regulation (LMIV) The situation: Since December 13, 2014, the LMIV EU 1169/2011 has been in effect throughout Europe. The aim of the regulation is to inform consumers about allergens, energy and nutritional values ​​as well as the origin of food. We know from various studies and tips from practice tha…	Thank you very much for submitting your suggestion. The issues raised in your submission concern the national implementation of an EU measure. For this reason, the members of the REFIT Platform consider that your concerns are best addressed by the Member States' specific contact point :  Germany: Federal Ministry of Food and Agriculture Food Labelling  Ireland: Food Safety Authority of Ireland …	Thank you very much for submitting your suggestion. The issues raised in your submission concern the national implementation of an EU measure. For this reason, the members of the REFIT Platform consider that your concerns are best addressed by the Member States' specific contact point :  Germany: Federal Ministry of Food and Agriculture Food Labelling  Ireland: Food Safety Authority of Ireland …	Evidence	1	Reduce	1	1	Competence	DE	0.149283	0.277049	0.00648147	0.0286691	0.337101	0.0121904	0.156563	0.0326628
e402	Y2018	2018-04-10	Business association	Business	Poland	Dotyczy uproszczenia rejestracji środków ochrony roślin i substancji czynnych zarejestrowanych w Strefie Centralnej Unii Europejskiej - pełna treść w załączniku	It concerns the simplification of registration of plant protection products and active substances registered in the Central Zone of the European Union - full text in the annex			Evidence	1	Harmonization	0	0		PL	0.167984	0.18444	0.0133336	0.04386	0.460371	0.0370007	0.0346494	0.0583611
e403	Y2018	2018-04-10	EU citizen	Citizen	Belgium	REPLACE MILITARY INITIATIVES BY CIVIC SERVICE PLEASE, ONLY THAT WILL BRING PEACE, I KNOW IT 1000% SURE ! THEN INVEST MASSIVELY INTO CRAFTSMEN	REPLACE MILITARY INITIATIVES BY CIVIC SERVICE PLEASE, ONLY THAT WILL BRING PEACE, I KNOW IT 1000% SURE ! THEN INVEST MASSIVELY INTO CRAFTSMEN	Thank you for your submission to the REFIT Platform that we have read with interest. The REFIT Platform is unfortunately not in a position to further treat it. You may however want to address your query to Europe Direct.	Thank you for your submission to the REFIT Platform that we have read with interest. The REFIT Platform is unfortunately not in a position to further treat it. You may however want to address your query to Europe Direct.	Opinion	0	Increase	0	1	Competence	EN	0.019743	0.0381216	0.0244393	0.0280729	0.0160563	0.252954	0.564196	0.0564167
e404	Y2018	2018-04-16	EU citizen	Citizen	Germany	Besserer Zugang zur Justiz in der EU ! Auch Bürgern sollte die Möglichkeit gegeben werden einen Antrag zur Vorabentscheidung beim EuGH einzureichen, wenn nationale Gerichte sich weigern, beweiserhebliche Fragen inbezug auf Einhaltung der EU CHARTA , EMRK etc. nicht an die EuGH weiterleiten, trotz Vorlagepflicht der Richter. Bessere Umsetzung von EU Recht in den Mitgliedstaaten durch Änderung des …	Better access to justice in the EU! Citizens should also be given the opportunity to submit an application for a preliminary ruling to the ECJ if national courts refuse not to forward questions relevant to evidence relating to compliance with the EU CHARTER, ECHR, etc. to the ECJ, despite the judges' obligation to present them. Better implementation of EU law in the member states by amending Art.…	Sehr geehrter Herr Söder, vielen Dank für Ihre Nachricht, die Sie uns mit der Referenz Nr S223936 über die Internetseite „Bürokratieabbau – Ihre Meinung zählt!“ übermittelt haben. Hier können Sie uns mitteilen, wie bestehende EU-Rechtsvorschriften effizienter und wirksamer gestaltet, der Regelungsaufwand verringert und Verwaltungsvorschriften vereinfacht werden können. Im Rahmen des REFIT Program…	"Dear Mr. Söder, Thank you for your message, which you sent us with the reference number S223936 via the website “Reduce bureaucracy - your opinion counts!”. Here you can tell us how existing EU legislation can be made more efficient and effective, how regulatory burdens can be reduced and administrative rules simplified. In the context of the REFIT program, the Commission is monitoring the reduc…	Evidence	1	Increase	0	1	Competence	DE	0.0101398	0.226991	0.0135882	0.278522	0.018998	0.33997	0.0944736	0.0173163
e405	Y2018	2018-04-20	EU citizen	Citizen	United Kingdom	The legal drinking age in the UK is 18, 16 or 17 if it is only beer, wine or cider bought by an adult to go with a meal. People under 18 are not allowed to purchase alcohol. Although I feel this is a responsible age for drinking and buying alcohol, I also feel like this encourages the ages of 16 and 17 to purchase alcohol illegally just to rebel because they feel it is not fair. If people can be …	The legal drinking age in the UK is 18, 16 or 17 if it is only beer, wine or cider bought by an adult to go with a meal. People under 18 are not allowed to purchase alcohol. Although I feel this is a responsible age for drinking and buying alcohol, I also feel like this encourages the ages of 16 and 17 to purchase alcohol illegally just to rebel because they feel it is not fair. If people can be …	Thank you very much for submitting your suggestion. The issues raised in your submission concern an issue not regulated at EU level but at national level. For this reason, the members of the REFIT Platform consider that your concerns will be best addressed by the Member States' specific contact point. For your information, please find a link to the EC Research Study “Eyes for Ages” (https://ec.eu…	Thank you very much for submitting your suggestion. The issues raised in your submission concern an issue not regulated at EU level but at national level. For this reason, the members of the REFIT Platform consider that your concerns will be best addressed by the Member States' specific contact point. For your information, please find a link to the EC Research Study “Eyes for Ages” (https://ec.eu…	Evidence	1	Increase	0	1	Competence	EN	0.0232982	0.008784	0.543978	0.00462982	0.00249654	0.009815	0.00835132	0.398647
e406	Y2018	2018-04-26	EU citizen	Citizen	Italy	Vorrei dare un consiglio su come rendere più consapevoli le persone di cosa fa l’Ue per loro. -Innanzitutto vorrei sottolineare che una prima bariera é quella linguistica, la maggior parte delle pagine web sono solo in inglese e questo impedisce agli utenti comuni di accedere alle informazioni di cui ha bisogno. Per risolvere questo problema bisognerebbe cercare di tradurre le pagine in almeno 4 …	I would like to give you some advice on how to make people more aware of what the EU is doing for them.	Gentile, grazie del messaggio inviato al sito "Ridurre la burocrazia - dite la vostra!". Il sito è nato per raccogliere pareri su come rendere la legislazione dell'UE più efficiente ed efficace e individuare le azioni per semplificare e ridurre gli oneri normativi. Per scoprire come lavorano l'Europa e le sue istituzioni, consigliamo di contattare il servizio Europe Direct della Commissione europ…	Dear, thanks for the message sent to the site " Reduce bureaucracy - have your say! ". The site was created to collect opinions on how to make EU legislation more efficient and effective and identify actions to simplify and reduce regulatory burdens. To find out how Europe and its institutions work, we recommend contacting the European Commission's Europe Direct service, set up to answer question…	Evidence	1	Increase	0	1	Competence	IT	0.0212067	0.0310419	0.0253932	0.0164291	0.0108032	0.0518191	0.037796	0.805511
e407	Y2018	2018-05-05	Business association	Business	Italy	In light of the Communication 550-15 scope to remove any unjustified restriction, I would put at Your attention an issue that may be a restraint to lawyers who - qualified in two different EU jurisdictions - are obliged to retain the registration into a bar in each Member State where entitled to practice if they want to appear before those Member States Courts; alternatively they can withdraw fro…	-First of all I would like to underline that a first barrier is the linguistic one, most of the web pages are only in English and this prevents ordinary users from accessing the information they need. To solve this problem we should try to translate the pages into at least 4 languages: English, French, Italy, German, are those that represent the majority of the population, thus making the audienc…	Thank you very much for your submissions S229200 and S229190 via Lighten the Load and your interest in the REFIT Platform. The Platform has considered your suggestions and decided that it will not prepare an opinion because it does not identify actions for increasing efficiency or effectiveness, nor on burden reduction of EU regulation or its implementation by Member States. We have forwarded you…	Thank you very much for your submissions S229200 and S229190 via Lighten the Load and your interest in the REFIT Platform. The Platform has considered your suggestions and decided that it will not prepare an opinion because it does not identify actions for increasing efficiency or effectiveness, nor on burden reduction of EU regulation or its implementation by Member States. We have forwarded you…	Evidence	1	Harmonization	0	1	Competence	EN	0.0105583	0.0113934	0.0251809	0.010594	0.00468733	0.740603	0.0407699	0.156213
e408	Y2018	2018-05-05	Business association	Business	Italy	In principle,Member States admit to Legal aid based services all lawyers there qualified and save some exceptions EU lawyers practicing under their Home State title pursuant to 98/5 Directive; 2003/08 Directive covers cross-border cases granting legal aid for both the lawyers involved in the two Member State. However, the provision of services pursuant to 249/77 Directive still continues to pose …	-Secondly, the European Union should make citizens aware of how it can affect their life and what work it does for them and not against them, many perceive it as a distant institution, always ready to impose laws lowered from above .	Thank you very much for your submissions S229200 and S229190 via Lighten the Load and your interest in the REFIT Platform. The Platform has considered your suggestions and decided that it will not prepare an opinion because it does not identify actions for increasing efficiency or effectiveness, nor on burden reduction of EU regulation or its implementation by Member States. We have forwarded you…	Thank you very much for your submissions S229200 and S229190 via Lighten the Load and your interest in the REFIT Platform. The Platform has considered your suggestions and decided that it will not prepare an opinion because it does not identify actions for increasing efficiency or effectiveness, nor on burden reduction of EU regulation or its implementation by Member States. We have forwarded you…	Evidence	1	Harmonization	0	1	Competence	EN	0.0306834	0.0870389	0.131371	0.0794525	0.0173281	0.291974	0.0541108	0.308042
e409	Y2018	2018-05-06	EU citizen	Citizen	Hungary	Re. Directive 2014/25/EU Celex32014L0025, Public procurement of postal item delivery (of newspapers,color magasines,printed periodicals all as postal items). Compensation for a postal quality delivery job as a private employee of a small enterprise. I believe cash compensation from national post to the private employees of another ( non state owned) delivery industry participant is reasoneable.Ma…	To do this, we should start with advertising campaigns to make known what advantages the EU has brought in recent years, with clear and simple messages. It could be ensured that in order to access a service or tender made available thanks to EU funds, a hypothetical blue card must be used that is the same throughout the Union in order to make citizens aware of how many things they do thanks to Eu…	Thank you very much for your submission via Lighten the Load and your interest in the REFIT Platform. The Platform has considered your suggestion and decided that it will not prepare an opinion because it does not identify actions for increasing efficiency or effectiveness, nor on burden reduction of EU regulation or its implementation by Member States. We have forwarded your query to the Directo…	Thank you very much for your submission via Lighten the Load and your interest in the REFIT Platform. The Platform has considered your suggestion and decided that it will not prepare an opinion because it does not identify actions for increasing efficiency or effectiveness, nor on burden reduction of EU regulation or its implementation by Member States. We have forwarded your query to the Directo…	Opinion	0	Neutral	0	1	Competence	EN	0.0206065	0.0100876	0.00851147	0.00776283	0.00322954	0.907702	0.0162802	0.0258199
e410	Y2018	2018-05-08	EU citizen	Citizen	United Kingdom	Change the WEEE directive (2012/19/EU) to include a requirement for producers to provide packages of information which are sufficient to enable easy re-use of products. The packages of information are released when the product is obsolete (or optionally earlier). This allows equipment that would otherwise be discarded to be reused without the burden of reverse engineering the hardware. Basic info…	Change the WEEE directive (2012/19/EU) to include a requirement for producers to provide packages of information which are sufficient to enable easy re-use of products. The packages of information are released when the product is obsolete (or optionally earlier). This allows equipment that would otherwise be discarded to be reused without the burden of reverse engineering the hardware. Basic info…			Evidence	1	Increase	0	0		EN	0.0131684	0.031232	0.00237836	0.0305639	0.89691	0.00588161	0.0124053	0.00746018
e411	Y2018	2018-05-10	EU citizen	Citizen	Germany	Er zouden gelijke mogelijkheden moeten zijn om pensioenpremies van de bedrijfskosten af te trekken, ook over landsgrenzen heen. Nu is er het volgende probleem: een in Duitsland betaalde vrijwillige pensioenpremie is in Nederland, bij het doen van belastingaangifte als zzp'er, niet aftrekbaar. Dit is ook niet mogelijk als 'oudedagsreserve'. Het gaat om een premie betaald aan BFA; deze organistie h…	There should be equal opportunities to deduct pension contributions from operating costs, even across national borders. Now there is the following problem: a voluntary pension premium paid in Germany is not deductible in the Netherlands when filing a tax return as a self-employed person. This is also not possible as an 'old age reserve'. It is a premium paid to BFA; this organization does not hav…			Evidence	1	Harmonization	0	0		NL	0.470487	0.0138364	0.0448073	0.0193646	0.00632487	0.402411	0.0261667	0.0166018
e412	Y2018	2018-05-13	Non-EU citizen	Citizen	Iran	As you may know there are certain countries which has high number of deaths in accident, referring to report from WHO: http://www.who.int/gho/road_safety/mortality/en/ In case of Iran the following reason is causing the death: 1) Improper enforcing law on public transportation 2) Instead of being restrict on drivers who are committing traffic related crimes, they are restricting driving exam proc…	As you may know there are certain countries which has high number of deaths in accident, referring to report from WHO: http://www.who.int/gho/road_safety/mortality/en/ In case of Iran the following reason is causing the death: 1) Improper enforcing law on public transportation 2) Instead of being restrict on drivers who are committing traffic related crimes, they are restricting driving exam proc…	Thank you for your message to the Better Regulation Portal “lighten the load – have your say”. This website is dedicated to collect views on how to make EU laws more effective and efficient, to identify actions for simplification and reduction of regulatory burden. The relevant EU law regarding Driving licences are Commission Decision (EU) 2016/1945 of 14 October 2016 on equivalences between cate…	Thank you for your message to the Better Regulation Portal “lighten the load – have your say”. This website is dedicated to collect views on how to make EU laws more effective and efficient, to identify actions for simplification and reduction of regulatory burden. The relevant EU law regarding Driving licences are Commission Decision (EU) 2016/1945 of 14 October 2016 on equivalences between cate…	Evidence	1	Increase	0	1	Competence	EN	0.0118583	0.03853	0.00974509	0.0630457	0.053989	0.770132	0.0209002	0.0317992
e413	Y2018	2018-05-14	Academic/research inst	Non-business org	Italy	In many cases the E.U. laws are too long and not easy to understand. In my opinion there should be also a brief summary understandable to common people.	In many cases the E.U. laws are too long and not easy to understand. In my opinion there should be also a brief summary understandable to common people.	Thank you for your message to the Better Regulation Portal “lighten the load – have your say”. This website is dedicated to collect views on how to make EU laws more effective and efficient, to identify actions for simplification and reduction of regulatory burden. To find out how Europe and its institutions are working, we recommend you contact the Commission's Europe Direct Service, which has b…	Thank you for your message to the Better Regulation Portal “lighten the load – have your say”. This website is dedicated to collect views on how to make EU laws more effective and efficient, to identify actions for simplification and reduction of regulatory burden. To find out how Europe and its institutions are working, we recommend you contact the Commission's Europe Direct Service, which has b…	Opinion	0	Reduce	1	1	Competence	EN	0.0248773	0.0429085	0.043024	0.0411011	0.0184815	0.294824	0.383681	0.151103
e414	Y2018	2018-05-15	EU citizen	Citizen	Spain	Sugiero revisen el sistema eléctrico español, ya que le déficit de tarifa del que hablan gobierno y empresas gestoras de red, puede no ser real.	I suggest you check the Spanish electricity system, since the tariff deficit that the government and network management companies talk about may not be real.	Estimado Señor: Agradecemos su interés en la Plataforma REFIT y la sugerencia que nos ha hecho llegar a través del portal “Mejora de la legislación”. Como usted bien sabe, la Plataforma REFIT trata sugerencias para simplificar y mejorar la legislación europea e iniciativas vigentes, hacerlas más eficaces y reducir la carga normativa. Entendemos que la revisión del sistema eléctrico español que us…	"Dear Sir: We appreciate your interest in the REFIT Platform and the suggestion that you have sent us through the "Improvement of Legislation" portal. As you well know, the REFIT Platform addresses suggestions to simplify and improve existing European legislation and initiatives, make them more effective and reduce regulatory burden. We understand that the revision of the Spanish electricity syst…	Opinion	0	Neutral	0	1	Competence	ES	0.30848	0.0528122	0.199659	0.264034	0.0230672	0.0467085	0.0503685	0.0548702
e415	Y2018	2018-05-22	EU citizen	Citizen	Germany	Die aktuelle ECE R 115* Norm bringt unnötige Bürokratie, "der Anlagenhersteller muss unter anderem nachweisen, dass das Abgasverhalten für jedes Fahrzeugmodell durch die Nachrüstung nicht negativ beeinflusst wird" Das Thema ist insbesondere in sofern unstrittig, da das Abgasverhalten grundsätzlich positiv beeinflußt wird. Die Regelung macht es schwieriger, LPG Anlagen herzustellen und einzubauen.…	The current ECE R 115 * standard brings unnecessary bureaucracy, "the system manufacturer must prove, among other things, that the exhaust gas behavior for each vehicle model is not negatively influenced by the retrofitting" The topic is undisputed, especially in so far as the exhaust gas behavior is generally positively influenced. The regulation makes it more difficult to manufacture and instal…	Thank you for your interest in the REFIT Platform and your submission BRP S236552 regarding the ECE R 115* Standard. We have read your query with interest and contacted the relevant European Commission Services in Directorate General for Internal Market, Industry, Entrepreneurship and SMEs. We are afraid the REFIT Platform will not be able to issue an opinion on your suggestion as it relates to n…	Thank you for your interest in the REFIT Platform and your submission BRP S236552 regarding the ECE R 115* Standard. We have read your query with interest and contacted the relevant European Commission Services in Directorate General for Internal Market, Industry, Entrepreneurship and SMEs. We are afraid the REFIT Platform will not be able to issue an opinion on your suggestion as it relates to n…	Evidence	1	Reduce	1	1	Competence	DE	0.0144407	0.804171	0.0176427	0.0155694	0.0269231	0.0183429	0.0232225	0.0796874
e416	Y2018	2018-05-25	Business association	Business	Belgium	DIRECTIVE 2009/54 ON NATURAL MINERAL WATERS: SUBMISSION FROM EFBW The application of Directive 2009/54 - mostly dating from 1980 – is raising a number of issues which the Commission, despite its efforts, has not been able to solve via implementing acts. ORIGINAL PURITY - Original purity is a defining element to distinguish natural mineral waters (NMW) from ordinary drinking water. However, the co…	DIRECTIVE 2009/54 ON NATURAL MINERAL WATERS: SUBMISSION FROM EFBW The application of Directive 2009/54 - mostly dating from 1980 – is raising a number of issues which the Commission, despite its efforts, has not been able to solve via implementing acts. ORIGINAL PURITY - Original purity is a defining element to distinguish natural mineral waters (NMW) from ordinary drinking water. However, the co…			Evidence	1	Increase	0	0		EN	0.00317788	0.632055	0.00172462	0.00690682	0.347337	0.00214954	0.00438336	0.00226581
e417	Y2018	2018-06-07	EU citizen	Citizen	Germany	Aktuell steht der Rechtsetzungsprozess für die Neustrukturierung der Europäischen Agentur für Netz- und Informationssicherheit zu einer EU-Cybersicherheitsagentur an (Verfahren 2017/0225/COD). Ich bitte Sie im Rahmen des Rechtsetungsverfahren die Belange der Bürger stärker zu berücksichtigen und die ENISA mit einem stärkeren Mandat hinsichtlich der Haftung bezüglich IoT-Produkten auszustatten. In…	The legislative process for the restructuring of the European Network and Information Security Agency into an EU cybersecurity agency is currently pending (procedure 2017/0225 / COD). I would ask you to take greater account of the interests of the citizens in the legal framework and to give ENISA a stronger mandate with regard to liability for IoT products. In particular, the attacks on Dyn and D…	Thank you for your submission regarding the Commission’s proposal for ENISA, the "EU Cybersecurity Agency", and repealing Regulation (EU) 526/2013, and on Information and Communication Technology cybersecurity certification (''Cybersecurity Act'') COM/2017/0477 final/2 - 2017/0225 (COD). The issue of insecure ICT products and devices is indeed a serious challenge that we need to address. As regar…	Thank you for your submission regarding the Commission’s proposal for ENISA, the "EU Cybersecurity Agency", and repealing Regulation (EU) 526/2013, and on Information and Communication Technology cybersecurity certification (''Cybersecurity Act'') COM/2017/0477 final/2 - 2017/0225 (COD). The issue of insecure ICT products and devices is indeed a serious challenge that we need to address. As regar…	Evidence	1	Increase	0	1	Policy substantive	DE	0.252208	0.0458731	0.00267007	0.00831268	0.174609	0.00608346	0.501751	0.00849351
e418	Y2018	2018-06-11	EU citizen	Citizen	France	Over the last few weeks, we’ve been hearing quite a lot about the catastrophic impact of all our plastic waiste and yet, many of the good citizens of Europe don’t make proper use of the recycling infrastructures available... why don’t we have a law that makes compulsory for every single packaging to show in which colored bin it should go ? A distinctive yellow mark for the yellow bin, a blue mark…	Over the last few weeks, we’ve been hearing quite a lot about the catastrophic impact of all our plastic waiste and yet, many of the good citizens of Europe don’t make proper use of the recycling infrastructures available... why don’t we have a law that makes compulsory for every single packaging to show in which colored bin it should go ? A distinctive yellow mark for the yellow bin, a blue mark…	The Platform has concluded that it does not intend to prepare an opinion on the issues raised. This decision is based on the fact that this submission fails to propose a simplification of the acquis; moreover, an EC proposal on Plastics is currently at the co-legislators. Having said that, it is to be noted that it is the Member States’ competence to organise the practical operation of waste mana…	The Platform has concluded that it does not intend to prepare an opinion on the issues raised. This decision is based on the fact that this submission fails to propose a simplification of the acquis; moreover, an EC proposal on Plastics is currently at the co-legislators. Having said that, it is to be noted that it is the Member States’ competence to organise the practical operation of waste mana…	Opinion	0	Increase	0	1	Competence	EN	0.332469	0.0489808	0.0217222	0.0322182	0.0437396	0.260499	0.046889	0.213482
e419	Y2018	2018-06-12	Non-EU citizen	Citizen	United States	The EU has excellent consumer protection laws for EU citizens but non-EU citizens traveling in Europe are not protected by European consumer authorities. When an EU-based company engages in unfair pricing, aggressive bullying, and extortion of a non-EU citizen, the European Commission ought to have regulations in place to prevent and punish such behavior on the part of a corporation. My specific …	The EU has excellent consumer protection laws for EU citizens but non-EU citizens traveling in Europe are not protected by European consumer authorities. When an EU-based company engages in unfair pricing, aggressive bullying, and extortion of a non-EU citizen, the European Commission ought to have regulations in place to prevent and punish such behavior on the part of a corporation. My specific …	Thank you for your interest in the REFIT Platform and your submission BRP S248742 regarding the non-respect of Passenger rights. We have read your query with interest and contacted the relevant European Commission Services in Directorate General Mobility and Transport who will get back to you on your request. We are afraid the REFIT Platform will not be able to issue an opinion on your suggestion…	Thank you for your interest in the REFIT Platform and your submission BRP S248742 regarding the non-respect of Passenger rights. We have read your query with interest and contacted the relevant European Commission Services in Directorate General Mobility and Transport who will get back to you on your request. We are afraid the REFIT Platform will not be able to issue an opinion on your suggestion…	Evidence	1	Harmonization	0	1	Competence	EN	0.220867	0.283443	0.0484968	0.0945212	0.0350064	0.184767	0.0507985	0.0820988
e420	Y2018	2018-06-12	EU citizen	Citizen	United Kingdom	Hold proper Elections by stopping illegal funding of political organisations and pressure groups. This will be an ongoing problem as evidenced by the UK Brexit referendum vote. Suggestion also is to have this vote nullified. It was driven by hateful and racist targeted advertisements, that have changed voters attitude. Russian funding of the Leave campaign persuaded many to vote Leave also. Pleas…	Hold proper Elections by stopping illegal funding of political organisations and pressure groups. This will be an ongoing problem as evidenced by the UK Brexit referendum vote. Suggestion also is to have this vote nullified. It was driven by hateful and racist targeted advertisements, that have changed voters attitude. Russian funding of the Leave campaign persuaded many to vote Leave also. Pleas…	Dear Sir, Thank you for your message to the website 'Lighten the load – Have your say'. This website is dedicated to collect views on how to make EU laws more effective and efficient, to identify actions for simplification and reduction of regulatory burden. To find out how Europe and its institutions are working, we recommend you contact the Commission's Europe Direct Service, which has been des…	Dear Sir, Thank you for your message to the website 'Lighten the load – Have your say'. This website is dedicated to collect views on how to make EU laws more effective and efficient, to identify actions for simplification and reduction of regulatory burden. To find out how Europe and its institutions are working, we recommend you contact the Commission's Europe Direct Service, which has been des…	Opinion	0	Increase	0	1	Competence	EN	0.0561416	0.0216923	0.0120725	0.00799728	0.00735424	0.0253995	0.0174705	0.851872
e421	Y2018	2018-06-13	EU citizen	Citizen	Italy	Bureaucracies throughout Europe need not be reduced but transformed. Bureaucracies are tropoPHOBIC by design. We can make them tropoPHILIC through a simple yet powerful two-stage process called The Search Conference & Participative Design Workshop designed over six decades by Fred Emery and his wife Emery. Further info here: http://sustainablesystemsinternational.org/?page_id=12 https://www.amazo…	Bureaucracies throughout Europe need not be reduced but transformed. Bureaucracies are tropoPHOBIC by design. We can make them tropoPHILIC through a simple yet powerful two-stage process called The Search Conference & Participative Design Workshop designed over six decades by Fred Emery and his wife Emery. Further info here: http://sustainablesystemsinternational.org/?page_id=12 https://www.amazo…	Thank you for your submission on the Better Regulation Portal. This website is dedicated to collect views on how to make EU laws more effective and efficient, to identify actions for simplification and reduction of regulatory burden. To find out how Europe and its institutions are working, we recommend you contact the Commission's Europe Direct Service, which has been designed to answer questions…	Thank you for your submission on the Better Regulation Portal. This website is dedicated to collect views on how to make EU laws more effective and efficient, to identify actions for simplification and reduction of regulatory burden. To find out how Europe and its institutions are working, we recommend you contact the Commission's Europe Direct Service, which has been designed to answer questions…	Opinion	0	Increase	0	1	Competence	EN	0.0177786	0.540558	0.158653	0.118593	0.0365601	0.0437475	0.0483367	0.0357738
e422	Y2018	2018-06-13	EU citizen	Citizen	Netherlands	Posted workers within the EU are confronted with various EU Regulations, eg the Posting of Workers Directive, Intra Corporate Transferees Directive and EC Regulation 883/2004, etc. For the Posting of Workers Directive a one year period applies, for the Intra Corporate Transferees Directive a 3 years period applies and for EC regulation a period of 2-5 years applies. (And in tax treaties a period …	Posted workers within the EU are confronted with various EU Regulations, eg the Posting of Workers Directive, Intra Corporate Transferees Directive and EC Regulation 883/2004, etc. For the Posting of Workers Directive a one year period applies, for the Intra Corporate Transferees Directive a 3 years period applies and for EC regulation a period of 2-5 years applies. (And in tax treaties a period …			Evidence	1	Harmonization	0	0		EN	0.936725	0.0121899	0.00404976	0.0101004	0.00965614	0.00800239	0.00716757	0.0121087
e423	Y2018	2018-06-14	Company/business org	Business	Romania	There is a number of EU countries which still don't have electronic identification and this is a local issue as well a complication for other EU members. The eID will reduce the corruption in certain states. Is it possible to make this mandatory to all members? Otherwise the gap between the EU members will increase.	There is a number of EU countries which still don't have electronic identification and this is a local issue as well a complication for other EU members. The eID will reduce the corruption in certain states. Is it possible to make this mandatory to all members? Otherwise the gap between the EU members will increase.			Opinion	0	Harmonization	0	0		EN	0.194768	0.0285999	0.0184097	0.0241701	0.0147617	0.600381	0.0856759	0.0332332
e424	Y2018	2018-06-14	NGO	Non-business org	Spain	EU Driving Licences. It was decided in 2013 I believe that these permits should be uniform across the Member States. The EU did not go far enough as each licence must be changed or renewed in each Member State when exercising freedom of movement. It would be better for all citizens if there was one universal EU driving licence permitted to be used in each State.	EU Driving Licences. It was decided in 2013 I believe that these permits should be uniform across the Member States. The EU did not go far enough as each licence must be changed or renewed in each Member State when exercising freedom of movement. It would be better for all citizens if there was one universal EU driving licence permitted to be used in each State.			Opinion	0	Harmonization	0	0		EN	0.00799558	0.0157156	0.0211906	0.0090184	0.00414771	0.879582	0.0191644	0.0431857
e425	Y2018	2018-06-15	EU citizen	Citizen	Ireland	Extend non discrimination provisions for EU citizens to prohibit the refusal of the provision of financial services (including insurance, and including unreasonably increasing the prices of such financial services to the extent that it amounts to a de-facto refusal of provision of services) on the grounds of country of residence. Smaller countries have smaller number of providers of financial ser…	Extend non discrimination provisions for EU citizens to prohibit the refusal of the provision of financial services (including insurance, and including unreasonably increasing the prices of such financial services to the extent that it amounts to a de-facto refusal of provision of services) on the grounds of country of residence. Smaller countries have smaller number of providers of financial ser…			Evidence	1	Harmonization	0	0		EN	0.246131	0.114448	0.0313351	0.112772	0.248339	0.211357	0.0213468	0.0142702
e426	Y2018	2018-06-15	EU citizen	Citizen	Ireland	Alter the legislation governing freedom of movement to allow those citizens of EU countries who wish to identify primarily as EU citizens (as distinct from citizens of the relevant EU member state) to obtain, upon satisfactory confirmation of their identity and citizenship of that EU member state (including direct confirmation from the member state in question) and consequent right to exercise fr…	Alter the legislation governing freedom of movement to allow those citizens of EU countries who wish to identify primarily as EU citizens (as distinct from citizens of the relevant EU member state) to obtain, upon satisfactory confirmation of their identity and citizenship of that EU member state (including direct confirmation from the member state in question) and consequent right to exercise fr…			Evidence	1	Harmonization	0	0		EN	0.00838632	0.0735617	0.0106532	0.0129486	0.03576	0.831813	0.0147342	0.0121434
e427	Y2018	2018-06-16	EU citizen	Citizen	United Kingdom	I suggest the EU reviews and highlights the compliance of internet memes with Art 13 of the Copyright Reform Proposal. Memes are a significant part of the online activity of the majority of young people, making them worth preserving. Most memes are created by independent individuals who use the meme template of other creators. In that regard, they are created and developed spontaneously and with …	I suggest the EU reviews and highlights the compliance of internet memes with Art 13 of the Copyright Reform Proposal. Memes are a significant part of the online activity of the majority of young people, making them worth preserving. Most memes are created by independent individuals who use the meme template of other creators. In that regard, they are created and developed spontaneously and with …			Evidence	1	Reduce	1	0		EN	0.0199793	0.597932	0.0544644	0.0311829	0.052524	0.0339256	0.139078	0.0709138
e428	Y2018	2018-06-17	EU citizen	Citizen	Spain	Dear Sir / Madam, I suggest to simplify the posting of workers in Europe by removing the limit of 24 months. I do not know why that limitation exists, but it is difficulting the Union and there shall be no time limit. Kindest regards, Diego González	Dear Sir / Madam, I suggest to simplify the posting of workers in Europe by removing the limit of 24 months. I do not know why that limitation exists, but it is difficulting the Union and there shall be no time limit. Kindest regards, Diego González			Opinion	0	Reduce	1	0		EN	0.626869	0.0827865	0.0236798	0.0650957	0.0355307	0.0824395	0.0340804	0.0495185
e430	Y2018	2018-06-26	NGO	Non-business org	Hungary	According to the Erasmus Plus Programme Guide, eligible expenditures regarding intellectual outputs are clearly grouped into different categories depending not only on the profile of the staff involved (manager, teacher / trainer, technician, administrative staff) but also on the country of the participating organization whose staff is involved. Although this system aimed at taking the different …	According to the Erasmus Plus Programme Guide, eligible expenditures regarding intellectual outputs are clearly grouped into different categories depending not only on the profile of the staff involved (manager, teacher / trainer, technician, administrative staff) but also on the country of the participating organization whose staff is involved. Although this system aimed at taking the different …			Evidence	1	Reduce	1	0		EN	0.136682	0.188655	0.0296021	0.0579112	0.0124223	0.0323694	0.153677	0.388681
e431	Y2018	2018-07-08	EU citizen	Citizen	Moldova	Dear Ladies and Gentlemen, This text regards Work Time Directive and describes the effects and consequences on my personal life and outlines key changes to safeguard other EU citizens. The broad consensus that is made in relation to the existence of this regulation is to ensure an adequate and reliable balance of rights and obligations between workers and employers. The input created a system whe…	Dear Ladies and Gentlemen, This text regards Work Time Directive and describes the effects and consequences on my personal life and outlines key changes to safeguard other EU citizens. The broad consensus that is made in relation to the existence of this regulation is to ensure an adequate and reliable balance of rights and obligations between workers and employers. The input created a system whe…	On behalf of the REFIT Platform, thank you for submitting your suggestion on the efficiency, effectiveness or burden reduction of EU regulation or its implementation by Member States. The Platform has concluded that it does not intend to prepare an opinion on the issues raised. This is because the Commission decided, in April 2017, to take a non-legislative approach in order to ensure a better im…	On behalf of the REFIT Platform, thank you for submitting your suggestion on the efficiency, effectiveness or burden reduction of EU regulation or its implementation by Member States. The Platform has concluded that it does not intend to prepare an opinion on the issues raised. This is because the Commission decided, in April 2017, to take a non-legislative approach in order to ensure a better im…	Evidence	1	Increase	0	1	Procedural	EN	0.672166	0.0241746	0.00727977	0.0491852	0.00906795	0.00856431	0.00871573	0.220847
e432	Y2018	2018-07-29	EU citizen	Citizen	France	Il appert qu'en France aujourd'hui les femmes trans (c'est à dire MtF), nous sommes persécutées par l état français. Les violences dont nous sommes victimes sont impunis par une politique général. Il est donc opportun d avoir un droit intra union européen d asile politique afin d être mise à l abri contre l état français It appears that in France today trans women (ie MtF), we are persecuted by t…	It appears that in France today trans women (ie MtF), we are persecuted by the French state. The violence of which we are victims is unpunished by a general policy. It is therefore appropriate to have an intra-European Union right of political asylum in order to be sheltered from the French state. It appears that in France today trans women (ie MtF), we are persecuted by the French state. The vio…			Opinion	0	Increase	0	0		FR	0.00510413	0.0116292	0.283423	0.00987498	0.00212636	0.654403	0.0143681	0.0190712
e433	Y2018	2018-07-29	EU citizen	Citizen	Germany	Anpassung der Gewerbeordnung § 36 zur Vermeidung von Inländerdiskriminierung in Deutschland durch falsche Interpretation durch die Wirtschaftsministerien und Obersten Baubehörden im Recht der Kammern und Eintragungsausschüsse für den Vorbeugenden Brandschutz entsprechend dem lebenden gesprochenen Beschluss des LG Hechingen. Der Inhalt des Beschlusses ist vom OLG Stuttgart geprüft. Der Beschluss h…	Adaptation of the trade regulations § 36 to avoid discrimination against nationals in Germany through incorrect interpretation by the ministries of economics and the supreme building authorities in the law of the chambers and registration committees for preventive fire protection in accordance with the lively, spoken decision of the LG Hechingen. The content of the decision has been checked by th…			Evidence	1	Harmonization	0	0		DE	0.00249931	0.0128189	0.0027958	0.948793	0.00499102	0.0159965	0.00941351	0.00269164
e434	Y2018	2018-07-29	EU citizen	Citizen	Spain	I would like to suggest the following EU laws concerning for animals.	I would like to suggest the following EU laws concerning for animals.			Opinion	0	Increase	0	0		EN	0.0304743	0.0869381	0.0457597	0.0500358	0.0332805	0.361028	0.257058	0.135426
e435	Y2018	2018-07-30	EU citizen	Citizen	United Kingdom	The rental car industry has for some time been a jungle for consumers with a complete lack of transparency, rip of pricing and malpractice (sometimes dangerously so). Check out @goldcarcares timeline on twitter for example - they are among the worst offenders. It’s time this industry was more tightly regulated and consumers given the protection and safeguards they deserve. I have tweeted the @euc…	The rental car industry has for some time been a jungle for consumers with a complete lack of transparency, rip of pricing and malpractice (sometimes dangerously so). Check out @goldcarcares timeline on twitter for example - they are among the worst offenders. It’s time this industry was more tightly regulated and consumers given the protection and safeguards they deserve. I have tweeted the @euc…			Opinion	0	Increase	0	0		EN	0.0503605	0.245514	0.130247	0.0219284	0.0332035	0.0317611	0.415587	0.0713983
e436	Y2018	2018-08-03	EU citizen	Citizen	Spain	Unificar las leyes electorales en toda la unión europea para que estas sean realmente democráticas e imparciales a los gobiernos de turno. Actualmente en muchos países como España la ley electoral es una "tomadura de pelo", casi podríamos decir que es un fraude de ley porque el resultado final no refleja la voluntad de los ciudadanos y en consecuencia deberíamos poder denunciar que no existe demo…	Unify electoral laws throughout the European Union so that they are truly democratic and impartial to the governments of the day. Currently in many countries like Spain the electoral law is a "" joke "", we could almost say that it is a fraud of the law because the final result does not reflect the will of the citizens and consequently we should be able to denounce that there is no democracy in S…	Thank you very much for submitting your suggestion. The items raised in your submission concern an issue not regulated at EU but at national level. For this reason, we are sorry to inform you that the members of the REFIT Platform consider that your concerns would be best addressed at national level. For your information, please find enclosed some contextual information on your submission provide…	Thank you very much for submitting your suggestion. The items raised in your submission concern an issue not regulated at EU but at national level. For this reason, we are sorry to inform you that the members of the REFIT Platform consider that your concerns would be best addressed at national level. For your information, please find enclosed some contextual information on your submission provide…	Evidence	1	Increase	0	1	Competence	ES	0.00284294	0.00344614	0.00436432	0.00250989	0.00126029	0.0238856	0.00688663	0.954804
e437	Y2018	2018-09-07	EU citizen	Citizen	Italy	Vorrei fare una proposta su come migliorare la sicurezza all’interno dell’Unione europea. Si dovrebbero installare telecamere in grado di leggere le targhe, sia alle frontiere interne che a quelle esterne. Il controllo dei dati potrebbe essere affidato ad una agenzia europea come quella delle dogane o a Europool, i dati sarebbero utilizzati solo per prevenire furti o rintracciare persone che tent…	I would like to make a proposal on how to improve security within the European Union.	On behalf of the REFIT Platform, thank you for submitting your suggestion on the efficiency, effectiveness or burden reduction of EU regulation or its implementation by Member States. The Platform has concluded that it does not intend to prepare an opinion on the issues raised. This is because the issues are: • covered by an EU legislative measure which only entered into application less than two…	On behalf of the REFIT Platform, thank you for submitting your suggestion on the efficiency, effectiveness or burden reduction of EU regulation or its implementation by Member States. The Platform has concluded that it does not intend to prepare an opinion on the issues raised. This is because the issues are: • covered by an EU legislative measure which only entered into application less than two…	Opinion	0	Increase	0	1	Procedural	IT	0.0349919	0.068533	0.0409532	0.109873	0.0314424	0.202495	0.376426	0.135286
e438	Y2018	2018-09-15	EU citizen	Citizen	Italy	Renting your home for short time. As the mobility is growing more and more, new opportunities comes for example renting your own home or part of it to tourist, work travellers, students, relatives of someone whom came for visit and so on and on. This allow the owner of the home to be helped economically in paying home taxes, bills and additional exonomical support as well as let traveller to trav…	Cameras capable of reading license plates should be installed, both at internal and external borders. The control of data could be entrusted to a European agency such as customs or to Europool, the data would be used only to prevent theft or trace people who try to cross borders. All police could make reports to a single database at European level so that if you were to trace a license plate in a…			Opinion	0	Reduce	1	0		EN	0.0153449	0.0341548	0.0191726	0.0370272	0.016124	0.297795	0.479831	0.10055
e439	Y2018	2018-09-15	EU citizen	Citizen	Italy	Open your small business (micro): Expecially for unemployed peolpe during these tight times, it shoul be easier open a small own business such as a bar, a wall painter, a home restaurant, a tourist guide, dog sitter and so on. For any kind of small business in Italy you would start, you have to deal with quite big burocracy first, which is unclear, triky, complicated and interpretative. As doing …	Open your small business (micro): Expecially for unemployed peolpe during these tight times, it shoul be easier open a small own business such as a bar, a wall painter, a home restaurant, a tourist guide, dog sitter and so on. For any kind of small business in Italy you would start, you have to deal with quite big burocracy first, which is unclear, triky, complicated and interpretative. As doing …	On behalf of the REFIT Platform, thank you for submitting your suggestion on the support to SMEs. The Platform has considered your suggestion and decided that it will not prepare an opinion because it does not identify actions for increasing efficiency or effectiveness, nor on burden reduction of EU regulation or its implementation by Member States. The EU does not have a competence to intervene …	On behalf of the REFIT Platform, thank you for submitting your suggestion on the support to SMEs. The Platform has considered your suggestion and decided that it will not prepare an opinion because it does not identify actions for increasing efficiency or effectiveness, nor on burden reduction of EU regulation or its implementation by Member States. The EU does not have a competence to intervene …	Evidence	1	Increase	0	1	Competence	EN	0.514306	0.00675626	0.00587958	0.00523835	0.00314608	0.0103631	0.00694058	0.44737
e440	Y2018	2018-09-15	EU citizen	Citizen	Italy	Family income: divorce is convenient sometimes! In Italy there are strange rules sometimes, for example the so called isee total income average which accordingly a family pay fees. For example in a family a husband has a well paid job and the wife is jobless. If she decides to go to university she pay high fees than she would be not married. The same is she have a kid, the kindergarten comes very…	Family income: divorce is convenient sometimes! In Italy there are strange rules sometimes, for example the so called isee total income average which accordingly a family pay fees. For example in a family a husband has a well paid job and the wife is jobless. If she decides to go to university she pay high fees than she would be not married. The same is she have a kid, the kindergarten comes very…	On behalf of the REFIT Platform, thank you for submitting your suggestion on the efficiency, effectiveness or burden reduction of EU regulation or its implementation by Member States. The Platform has concluded that it does not intend to prepare an opinion on the issues raised. This is because the issues addressed, substantive family law and substantive taxation law, fall within the competence of…	On behalf of the REFIT Platform, thank you for submitting your suggestion on the efficiency, effectiveness or burden reduction of EU regulation or its implementation by Member States. The Platform has concluded that it does not intend to prepare an opinion on the issues raised. This is because the issues addressed, substantive family law and substantive taxation law, fall within the competence of…	Evidence	1	Reduce	1	1	Competence	EN	0.18303	0.0161146	0.72747	0.0191787	0.00381243	0.0210421	0.0130249	0.0163268
e441	Y2018	2018-09-16	EU citizen	Citizen	Germany	Sehr geehrte Damen und Herren, ich lebe gern in Deutschland und bin mit den meisten hiesigen Regelungen sehr zufrieden. Insbesondere auf dem Gebiet der Gleichstellung zwischen den Geschlechtern ist Deutschland vorbildlich. Frauen sind heute auch in den früheren "Männerberufen" willkommem. Im schriftlichen Behördenkontakt werden Frauen und Männer sprachlich gleichgestellt. Bei der Eheschliessung z…	Dear Ladies and Gentlemen, I like living in Germany and am very satisfied with most of the local regulations. Germany is particularly exemplary in the area of ​​gender equality. Today women are also welcome in the earlier "" male professions "". In written contact with the authorities, women and men are linguistically equated. When marrying a man and a woman, the spouses can choose who would like…	1 February 2019. translated version of the reply: On behalf of the REFIT Platform, thank you for submitting your suggestion on the efficiency, effectiveness or burden reduction of EU regulation or its implementation by Member States. The Platform has concluded that it does not intend to prepare an opinion on the issues raised. This is because the request falls beyond the remits of the REFIT Platf…	1 February 2019. translated version of the reply: On behalf of the REFIT Platform, thank you for submitting your suggestion on the efficiency, effectiveness or burden reduction of EU regulation or its implementation by Member States. The Platform has concluded that it does not intend to prepare an opinion on the issues raised. This is because the request falls beyond the remits of the REFIT Platf…	Evidence	1	Reduce	1	1	Competence	DE	0.00653539	0.0406201	0.647744	0.0110262	0.00471427	0.177032	0.0942024	0.0181261
e442	Y2018	2018-09-16	EU citizen	Citizen	Italy	Pay to pay taxes. In italy you have to pay someone else (expertise) in order he or she calculates the amount of taxes you have to pay to the state, unless you are a trained skilled accountant. It is valid both if you income is a 20€ or 1 billion a year. I suggest to have a free tax dignity life level where if your income is at the level for conducting a dignity life you do not have to pay any tax…	Pay to pay taxes. In italy you have to pay someone else (expertise) in order he or she calculates the amount of taxes you have to pay to the state, unless you are a trained skilled accountant. It is valid both if you income is a 20€ or 1 billion a year. I suggest to have a free tax dignity life level where if your income is at the level for conducting a dignity life you do not have to pay any tax…			Opinion	0	Reduce	1	0		EN	0.930025	0.00962063	0.00879029	0.00668388	0.00413732	0.0194938	0.00722293	0.0140257
e443	Y2018	2018-09-19	Company/business org	Business	Germany	Good Day, I would like to emphasise that here in Europe, we have two regulations (REACh and RoHS), which partly contradict each other. The RoHS Directive 2011/65/EU explicitly allows exceptions for lead (since 2003) and the REACh Regulation 1907/2003/EC stipulates an obligation to notify since June 2018. Here it is the problem that the RoHS Regulation, with its exceptions the use of lead in alloy…	Good Day, I would like to emphasise that here in Europe, we have two regulations (REACh and RoHS), which partly contradict each other. The RoHS Directive 2011/65/EU explicitly allows exceptions for lead (since 2003) and the REACh Regulation 1907/2003/EC stipulates an obligation to notify since June 2018. Here it is the problem that the RoHS Regulation, with its exceptions the use of lead in alloy…			Evidence	1	Reduce	1	0		EN	0.0547812	0.158461	0.0156091	0.277422	0.312682	0.0167619	0.0289082	0.135375
[truncated: 115 more rows]
